1

2

# Normative and mechanistic model of an adaptive circuit for efficient encoding and feature extraction

3

4 Nikolai M. Chapochnikov<sup>1,2,✉</sup>, Cengiz Pehlevan<sup>3</sup>, Dmitri B. Chklovskii<sup>1,4</sup>

5 <sup>1</sup>Flatiron Institute, Simons Foundation, New York, NY, USA

6 <sup>2</sup>current address: Department of Neurology, New York University School of Medicine, New York,  
7 NY, USA

8 <sup>3</sup>John A. Paulson School of Engineering and Applied Sciences, Harvard University, Cambridge,  
9 MA, USA

10 <sup>4</sup>Neuroscience Institute, New York University School of Medicine, New York, NY, USA

11 ✉email: [nchapochnikov@gmail.com](mailto:nchapochnikov@gmail.com)

12

## Abstract

13

14

15

16

17

18

19

20

21

22

23

24

25

26

27

28

29

30

One major question in neuroscience is how to relate connectomes to neural activity, circuit function, and learning. We offer an answer in the peripheral olfactory circuit of the *Drosophila* larva, composed of olfactory receptor neurons (ORNs) connected through feedback loops with interconnected inhibitory local neurons (LNs). We combine structural and activity data and, using a holistic normative framework based on similarity-matching, we propose a biologically plausible mechanistic model of the circuit. Our model predicts the ORN  $\rightarrow$  LN synaptic weights found in the connectome and demonstrate that they reflect correlations in ORN activity patterns. Additionally, our model explains the relation between ORN  $\rightarrow$  LN and LN  $-$  LN synaptic weight and the arising of different LN types. This global synaptic organization can autonomously arise through Hebbian plasticity, and thus allows the circuit to adapt to different environments in an unsupervised manner. Functionally, we propose LNs extract redundant input correlations and dampen them in ORNs, thus partially whitening and normalizing the stimulus representations in ORNs. Our work proposes a comprehensive framework to combine structure, activity, function, and learning, and uncovers a general and potent circuit motif that can learn and extract significant input features and render stimulus representations more efficient.

## 31 Significance

32 The brain represents information with patterns of neural activity. At the periphery, due to the  
33 properties of the external world and of encoding neurons, these patterns contain correlations, which  
34 are detrimental for stimulus discrimination. We study the peripheral olfactory neural circuit of the  
35 *Drosophila* larva, that preprocesses neural representations before relaying them to higher brain  
36 areas. A comprehensive understanding of this preprocessing is, however, lacking. Here, we propose  
37 a mechanistic and normative framework describing the function of the circuit and predict the  
38 circuit's synaptic organization based on the circuit's input neural activity. We show how the circuit  
39 can autonomously adapt to different environments, extracts stimulus features, and decorrelate and  
40 normalize input representations, which facilitates odor discrimination downstream.

## 41 Introduction

42 Thanks to technological advances in connectomics (Eichler et al., 2017; Scheffer et al., 2020) and  
43 neural population activity imaging (Aimon et al., 2019), more and more neural circuits will soon  
44 be characterized anatomically and physiologically at unprecedented scale and detail. However, it  
45 is not clear what insights can be obtained from combining such datasets and how to use them  
46 to advance our understanding of brain computation. To address this, we focus on the peripheral  
47 olfactory system of the *Drosophila* larva - a small and genetically tractable circuit for which a  
48 connectivity (Berck et al., 2016) and comprehensive activity imaging (Si et al., 2019) datasets are  
49 already available.

50 This circuit is an analogous, but simpler version of the well-studied olfactory circuit in adult  
51 flies and vertebrates (Wilson, 2013). It contains 21 olfactory receptor neurons (ORNs), each ex-  
52 pressing a different receptor type with a different odor sensitivity profile (**Fig. 1A**). ORN axons are  
53 reciprocally connected to a web of multiple interconnected inhibitory local neurons (LNs) through  
54 feedforward excitation and feedback inhibition. The connectome dataset contains not just the pres-  
55 ence or absence of a connection between two neurons but also the number of synaptic contacts in  
56 parallel (Berck et al., 2016), which is an estimate of the connection strength, since synaptic con-  
57 tacts do not vary significantly in size in the *Drosophila* (Scheffer et al., 2020). The activity dataset  
58 contains the responses of ORNs to 34 odors at 5 dilutions (**Fig. 2A**) and has been obtained by  
59 imaging  $\text{Ca}^{2+}$  concentration in their somas (Si et al., 2019).

60 Previous studies addressed the role of the inhibitory feedback provided by LNs in transform-  
61 ing the neural representation of odors from ORN somas to projection neurons (PNs), which are  
62 postsynaptic to ORNs. In adult *Drosophila*, this circuit was suggested to perform gain-control and  
63 divisive normalization (Olsen et al., 2010; Olsen & Wilson, 2008), which equalizes different odor  
64 concentrations and decorrelates input channels. In the zebrafish larva, an analogous circuit was  
65 suggested to whiten the input leading to pattern decorrelation which helps odors discrimination  
66 downstream (Friedrich, 2013; Wanner & Friedrich, 2020).

67 However, the underlying mechanistic principles of computation are still not elucidated. For  
68 example, whereas different types of LNs have different connectivity patterns with ORNs in the  
69 *Drosophila* larva (Berck et al., 2016), the role of different LN types, their multiplicity, and their  
70 specific connectivity is not understood. Also, the peripheral olfactory circuit exhibits synaptic  
71 plasticity in response to olfactory environment changes (Arenas et al., 2012; Das et al., 2011;  
72 Devaud et al., 2001; Sachse et al., 2007; Sudhakaran et al., 2012), but the functional role of such  
73 plasticity is unclear.

74 To address these shortcomings, we use a combination of data analysis and modeling and develop  
75 a holistic theoretical framework that links circuit structure, function, activity data, and learning.  
76 Our contribution is fourfold. (1) We find that the ORNs  $\rightarrow$  LN synaptic weights vectors reflect  
77 features of the independently acquired ORN activity patterns dataset (**Fig. 2, 3, 4**). (2) Building  
78 upon the similarity matching framework (Pehlevan et al., 2018), we develop a novel, biologically  
79 realistic, normative circuit model incorporating activity-dependent synaptic plasticity. (3) The  
80 model, driven by the ORN activity dataset, predicts the following observations in the structural  
81 dataset: the ORNs  $\rightarrow$  LN synaptic weights (**Fig. 4**), the emergence of LNs groups (**Fig. 4**), and  
82 the relationship between feedforward ORN  $\rightarrow$  LN and lateral LN - LN connection (**Fig. 5**). (4)  
83 Using our model, we characterize the circuit computation (**Fig. 6, 7**), and propose that LNs play  
84 a dual role in rendering the neural representation of odors in ORNs more efficient and extracting  
85 useful features that are transmitted downstream. Furthermore, we show that the synaptic weights  
86 enabling this computation can be learned by the circuit in an unsupervised manner.

87 In this study, we further our understanding of LNs and their computations. We highlight the  
88 importance of minutely organized ORN - LN and LN - LN connection weights, which allows LNs  
89 to encode different significant features of input activity and dampen them in ORN axons. The  
90 transformation from the representation in ORN somas to that in ORN axons consists of a partial  
91 equalization of the PCA variances, which enables a more efficient stimulus encoding (Barlow, 1961).  
92 Indeed, this results in a decorrelation and equalization of ORNs and odor representations, which  
93 correspond to two fundamental computations in the brain: partial ZCA (zero-phase) whitening  
94 (Bell & Sejnowski, 1997; Kessy et al., 2018) and divisive normalization (Carandini & Heeger,  
95 2012). In essence, we uncover an elegant neural circuit motif that can, via associative Hebbian  
96 plasticity, adapt to different stimuli environment and learn to extract features as well as to perform  
97 two critical computations. Thus, we present a framework that allows to quantitatively link synaptic  
98 weights in the structural data with the circuit's function and with the circuit adaptation to input  
99 correlations, thus making a crucial step towards more integrated understanding of neural circuits.

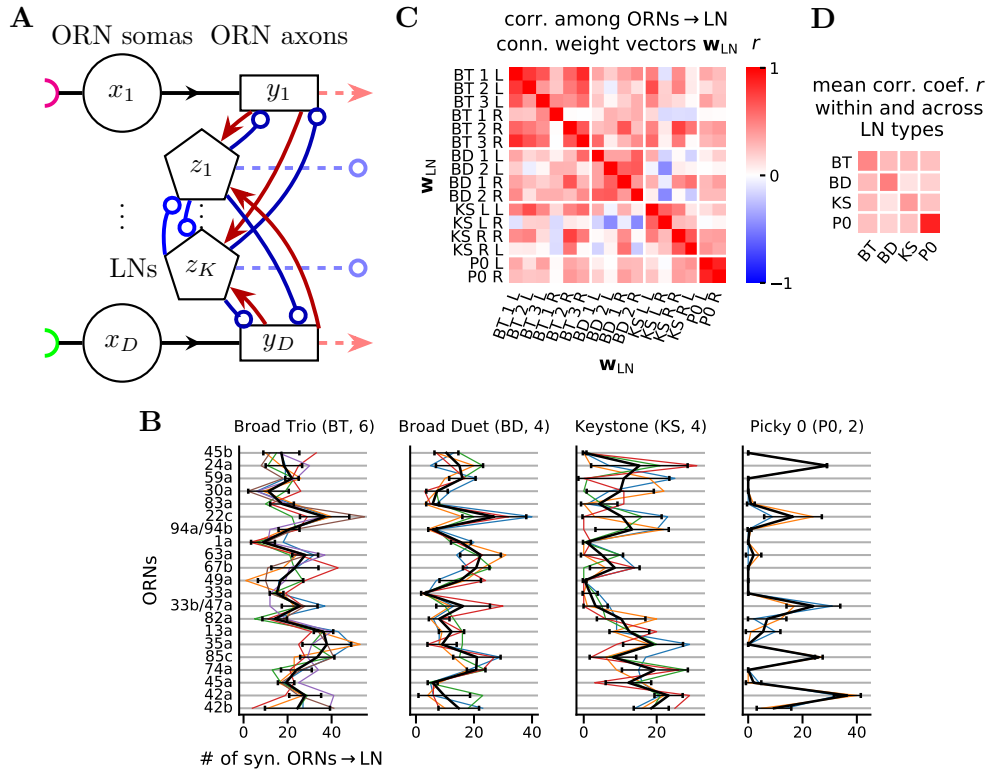

**Fig. 1. Circuit connectivity and LN types**

**A** Scheme of the ORN-LN circuit. Each of the  $D$  ORNs is depicted as a two-compartment unit with a soma (circle) and an axonal terminal (rectangle). The differently colored half circles on the left represent different chemical receptor types.  $K$  inhibitory local neurons (LNs, pentagons) reciprocally connect with ORN axons and between themselves. ORN axons and LNs transmit information further downstream (dashed lines). Red lines with arrowheads and blue lines with open circles represent excitatory and inhibitory connections, respectively.  $x_i$ ,  $y_i$ , and  $z_i$  represent the activity of ORN somas, axons, and LNs, respectively.

**B** Feedforward ORNs  $\rightarrow$  LN connection weight vectors,  $w_{LN}$  (colored lines), and average feedforward ORNs  $\rightarrow$  LN type connection weight vectors,  $w_{LNtype}$  (black lines, mean  $\pm$  s.d.) for each LN type (see also **Fig. S2A**).

**C** Correlation coefficients  $r$  between all  $w_{LN}$ . L: left, R: right. KS L R is the Keystone with the soma positioned on the left side of the larva, connecting with the ORNs of the right side, and vice-versa for KS R L. Since Picky 0 receives synaptic input mainly on the dendrite, here we only use the connections synapsing onto the dendrite.

**D** Average rectified correlation coefficient  $\langle r_+ \rangle$  ( $r_+ := \max[0, r]$ ) between LN types calculated by averaging the rectified values from **(C)** in each rectangle with white border, excluding the diagonal entries of the full matrix.

## 100 Results

### 101 ORN-LN circuit

102 ORNs in the *Drosophila* larva carry odor information from antennas to the antennal lobe. There it  
103 is reformatted and handed over to PNs which transmit it to higher brain areas like the mushroom  
104 body and the lateral horn (Berck et al., 2016). LNs, which synapse bidirectionally with ORN axons  
105 and PN dendrites, strongly contribute to this reformatting through presynaptic and postsynaptic  
106 inhibition, as mainly shown in the adult fly (Asahina et al., 2009; Chou et al., 2010; Kim et al.,  
107 2015; Laurent, 2002; Nagel et al., 2014; Olsen et al., 2010; Olsen & Wilson, 2008).

108 Here, we focus on the circuit and computation presynaptic to PNs, i.e., occurring from ORN  
109 somas to ORN axons driven by LN inhibition. Specifically, we study the sub-circuit formed by  
110 all  $D = 21$  ORNs and those 4 LN types (on each side of the brain) that provide direct inhibitory  
111 feedback onto the ORNs (Berck et al., 2016) (**Fig. 1A, S1**). The 4 LN types include 3 Broad Trio  
112 (BT) neurons, 2 Broad Duet (BD) neurons, 1 Keystone (KS, bilateral connections) neuron and 1  
113 Picky 0 (P0) neuron (**Fig. S1, S2A**). This amounts to 8 ORNs - LN connections per side (3 BTs,  
114 2 BDs, 2 KSs, and 1 P0s), and 16 on both sides.

115 We use the number of synapses in parallel between two neurons as a proxy of the synaptic  
116 weight  $w$  because synapses in the *Drosophila* larva have been found to be of similar sizes (Scheffer  
117 et al., 2020; Takemura et al., 2013) and synaptic size correlates with strength (Holderith et al.,  
118 2012). In the linear approximation, the contribution of a connection to the postsynaptic neuron  
119 activity  $a_{post}$  is proportional to the product of  $w$  and the presynaptic neuron activity  $a_{pre}$ , i.e.,  
120  $a_{post} \propto w \cdot a_{pre}$ .

121 We focus our analysis on the feedforward ORNs  $\rightarrow$  LN connection weight vectors,  $\mathbf{w}_{LN}$ , whose  
122  $D = 21$  components are  $w$ 's corresponding to the connections from different ORNs onto the same  
123 post-synaptic LN rather than the feedback LN  $\rightarrow$  ORNs. Because all the components of such  
124 a weight vector share the same post-synaptic neuron their effect on the post-synaptic activity  
125 is directly comparable, i.e. the coefficient of proportionality in  $a_{LN} \propto \sum_i w_{LN,i} \cdot a_{pre,i}$  is the  
126 same. Conversely, the  $w$ s from one LN onto all 21 ORNs are not directly comparable among each  
127 other, because each connection affects a different postsynaptic ORN, which potentially has different  
128 electrical properties. Yet, the feedforward and feedback connection vectors are somewhat correlated  
129 (**Fig. S2**).

130 While Berck et al., 2016 divided the LNs into the above types based on their neuronal lineage,  
131 morphology, and qualitative connectivity, we also find that such types are innervated differently  
132 by ORNs (**Fig. 1B**). Indeed, the average correlations within LN type is higher than between LN  
133 types  $\mathbf{w}_{LN}$  (**Fig. 1C,D**). Thus, for a part of our study (**Fig. 2, 3, 4A,B**) we use the 4 average  
134  $\mathbf{w}_{LNtype} = \frac{1}{n} \sum_{LN \in LNtype} \mathbf{w}_{LN}$ , where  $n$  is the number of connection vectors for that LN type.

135 **Odor representations in ORNs are aligned with ORNs → Broad Trio connectivity weight**  
136 **vector**

137 Several studies proposed that the LNs could facilitate decorrelation of the neural representation  
138 of odors (Friedrich, 2013; Friedrich & Laurent, 2001; Friedrich & Wiechert, 2014; Giridhar et al.,  
139 2011; Gschwend et al., 2015; Wanner & Friedrich, 2020). To perform such decorrelation, the circuit  
140 needs to be adapted to or “know about” the correlations in the activity patterns (Simoncelli &  
141 Olshausen, 2001). We investigated if this is the case in this olfactory circuit by testing whether the  
142  $\mathbf{w}_{LNtype}$  contain signatures of ORN activity patterns.

143 An ensemble of ORN activity patterns  $\{\mathbf{x}^{(t)}\}_{data}$  ( $t = 1, \dots, 170$ ) was obtained using  $Ca^{2+}$   
144 fluorescence imaging of ORN somas in response to a set of 34 odorants at 5 dilutions (Si et al.,  
145 2019) (**Fig. 2A**). These odorants were chosen from the components of fruits and plant leaves from  
146 the larva’s natural environment to stimulate ORNs as broadly and evenly as possible, with many  
147 odorants activating just a single ORN at the lowest concentration (i.e., the highest dilution).

148 Activity patterns  $\mathbf{x}^{(t)}$  elicited by different odorants are correlated with the synaptic weight  
149 vector  $\mathbf{w}_{BT}$  to a different degree (**Fig. 2B-D**), yet are such correlations statistically significant?  
150 To determine this, we first calculate the Pearson correlation coefficients  $r$  between the four  $\mathbf{w}_{LNtype}$   
151 and the ensemble of  $\{\mathbf{x}^{(t)}\}_{data}$  (**Fig. 2E**). Each  $\mathbf{w}_{LNtype}$  exhibits a different “connectivity tuning  
152 curve” shape (**Fig. 2F**),  $\mathbf{w}_{BT}$  being the most broadly aligned to the  $\mathbf{x}^{(t)}$  of this stimuli set,  
153  $\mathbf{w}_{P0}$  the most sharply aligned to a few  $\mathbf{x}^{(t)}$ , and the  $\mathbf{w}_{BD}$  and  $\mathbf{w}_{KS}$  the most weakly aligned. To  
154 test if the  $\mathbf{w}_{LNtype}$  are significantly aligned with the ensemble  $\{\mathbf{x}^{(t)}\}_{data}$ , we compare the relative  
155 cumulative frequency (RCF) of  $r$  in the data with the RCFs of  $r$  obtained after randomly shuffling  
156 the entries of each  $\mathbf{w}_{LNtype}$  (**Fig. 2G,H**). We use the maximum deviation from the mean RCF from  
157 shuffled connection vector to measure significance and find that only  $\mathbf{w}_{BT}$  is significantly aligned  
158 to  $\{\mathbf{x}^{(t)}\}_{data}$  (**Fig. 2H,I**).

159 Furthermore, we find that  $\mathbf{w}_{BT}$  is significantly aligned with the first PCA direction of  $\{\mathbf{x}^{(t)}\}_{data}$   
160 (**Fig. S6A,B**), but none of remaining  $\mathbf{w}_{LNtype}$  significantly aligned with any of the top 5 PCA  
161 directions (**Fig. 3**). We choose to compare with the top 5 (instead of 4, as the number of  $\mathbf{w}_{LNtype}$ )  
162 PCA directions of  $\{\mathbf{x}^{(t)}\}_{data}$  to cover more activity direction, thus accounting for the fact that this  
163 activity dataset does not have the same statistics of odors as the true larva environment, and likely  
164 has a different order of PCA directions. We performed PCA without centering  $\{\mathbf{x}^{(t)}\}_{data}$ , to avoid  
165 any preprocessing on the activity data and mimic what the circuit is experiencing. The first PCA  
166 direction is thus relatively close to the mean activity direction.

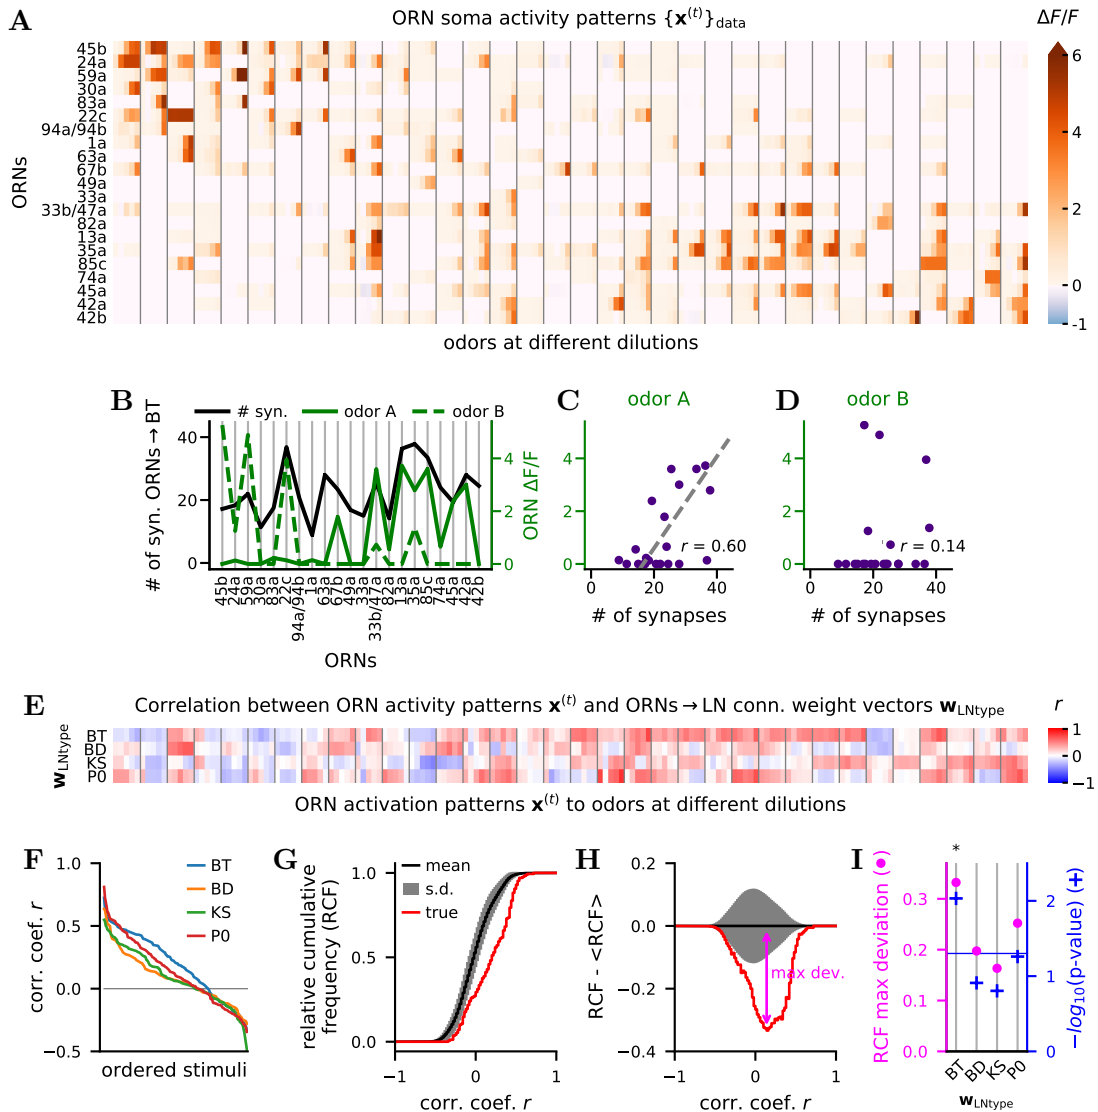

**Fig. 2. Alignment of ORNs  $\rightarrow$  LN connectivity weight vectors with odor representations in ORN activity**

**A** Activity patterns  $\{\mathbf{x}^{(t)}\}_{data}$  at ORN soma in response to 34 odors at 5 dilutions from Si et al., 2019. Different odors are separated by vertical gray lines. For each odor, there are 5 columns corresponding to 5 dilutions:  $10^{-8}, \dots, 10^{-4}$ . See **Fig. S3** for odor labels and scaled  $\mathbf{x}^{(t)}$ .

**B**  $\mathbf{w}_{BT}$  superimposed with ORNs activity patterns  $\mathbf{x}^{(A)}$  and  $\mathbf{x}^{(B)}$  in response to the ligands 2-heptanone (odor A) and 2-acetylpyridine (odor B) at dilution  $10^{-4}$ .

**C-D** Scatter plot representation of **(B)**.  $\mathbf{w}_{BT}$  is more strongly tuned to  $\mathbf{x}^{(A)}$  ( $r = 0.6$ ) than to  $\mathbf{x}^{(B)}$  ( $r = 0.14$ ).

**E** Correlation coefficients between  $\mathbf{w}_{LNtype}$  with the  $\mathbf{x}^{(t)}$  from **(A)** (see also **Fig. S4A**).

**F** LN “connectivity tuning curves”: correlation coefficients sorted in decreasing order from **(E)** for each  $\mathbf{w}_{LNtype}$ .

**G** Red line: relative cumulative frequency (RCF) of the correlation coefficients  $r$  of the first row of **(E)**. Black line and gray band: mean  $\pm$  s.d. from the RCFs generated by 10,000 instances of shuffling the entries of  $\mathbf{w}_{BT}$ . Bin size: 0.02.

**H** Same as **(G)** with the mean RCF subtracted. We define the maximum deviation as the maximum negative difference between the true and the mean RCF of correlation coefficients.

**I** RCF maximum deviation and  $\log_{10}$  of false discovery rate (FDR, Benjamini and Hochberg, 1995) adjusted p-values for each  $\mathbf{w}_{LNtype}$  (see also **Fig. S4B**). \*: significance with FDR at 5%.



167 Next, to test whether the connection vectors  $\mathbf{w}_{\text{LNtype}}$  might be linear combinations of the PCA  
 168 directions of  $\{\mathbf{x}^{(t)}\}_{\text{data}}$ , we examine the alignment of the subspace spanned by the 4  $\mathbf{w}_{\text{LNtype}}$  and  
 169 the one spanned by the top 5 PCA directions of  $\{\mathbf{x}^{(t)}\}_{\text{data}}$  (**Fig. S5**). We define a measure  
 170  $0 \leq \Gamma \leq 4$ , approximately representing the number of aligned directions between these 2 subspaces  
 171 (**Methods**) and find  $\Gamma \approx 2$ . This value significantly deviates from the expected  $\Gamma$  from subspaces  
 172 generated by 4 and 5 Gaussian random normal vectors in 21 dimensions ( $p < 10^{-4}$ ) and subspaces  
 173 generated from the 4 connectivity vectors with shuffled entries and the 5 original activity vectors  
 174 from PCA ( $p < 0.01$ ). Approximately 1 more dimension is significantly aligned between the 2  
 175 subspaces than expected by random, supporting the results from **Fig. 3C**.

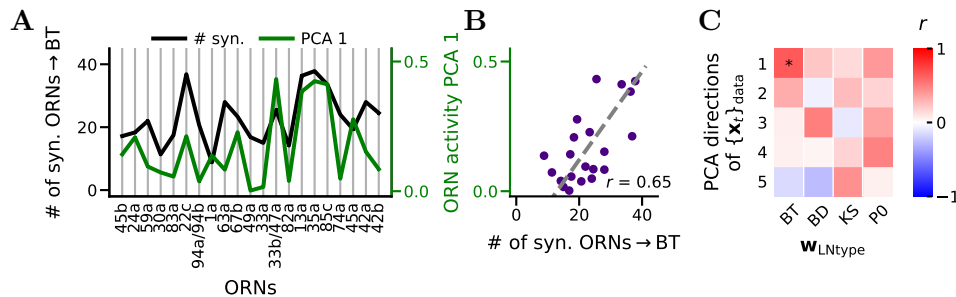

**Fig. 3. Alignment of  $\mathbf{w}_{\text{BT}}$  with the top PCA direction of ORN activity patterns  $\{\mathbf{x}^{(t)}\}_{\text{data}}$**

**A**  $\mathbf{w}_{\text{BT}}$  superimposed in the 1<sup>st</sup> PCA direction of  $\{\mathbf{x}^{(t)}\}_{\text{data}}$ .

**B** Scatter plot representation of (**A**).

**C** Correlation coefficient  $r$  between the top 5 principal directions of  $\{\mathbf{x}^{(t)}\}_{\text{data}}$  and the four  $\mathbf{w}_{\text{LNtype}}$  (see also **Fig. S6C,D,G**). Two-sided p-values were calculated by shuffling the entries of each  $\mathbf{w}_{\text{LNtype}}$ . 50,000 permutations used. \*: significance with FDR at 5%.

176 In summary, we find that  $\mathbf{w}_{\text{BT}}$  is adapted to ORNs activity patterns  $\{\mathbf{x}^{(t)}\}_{\text{data}}$  as demonstrated  
 177 by (1) the significant alignment of  $\mathbf{w}_{\text{BT}}$  with individual activity patterns  $\mathbf{x}^{(t)}$ , (2) the significant  
 178 alignment of  $\mathbf{w}_{\text{BT}}$  with the top PCA direction of  $\{\mathbf{x}^{(t)}\}_{\text{data}}$ , and (3) by a significantly large  $\Gamma$ .  
 179 This supports the idea that the circuit is at least partially adapted to ORN activity patterns. This  
 180 analysis fails, however, to reveal the relation between ORN activity and LNs other than BT.

### 181 **A normative and mechanistic model of the ORN-LN circuit**

182 A detailed bottom-up modeling of the circuit requires the knowledge of the multiple unavailable  
 183 physiological parameters such as ion channel distributions and neural morphologies. We therefore  
 184 take here a route that circumvents these unknowns and harvests the benefits of normative ap-  
 185 proaches: similar to physics, we guess the circuit cost function, derive the governing equations, and  
 186 see if their predictions agree with experiments.

187 Similarity-matching objective functions have been shown to be capable of extracting PCA sub-  
 188 spaces and can be optimized by biologically plausible neural circuits with Hebbian synaptic learning  
 189 rules (Pehlevan et al., 2018). Motivated by the result that the ORN-LN circuit might be adapted  
 190 to at least one PCA direction of the input, we postulated a similarity-matching inspired objective



191 function (equation (18)), such that its online optimization equations maps onto the neural dynam-  
 192 ics of the ORN-LN circuit (equations (19), (20)) and Hebbian plasticity update rules for ORN-LN  
 193 and LN-LN synapses (equation (21)). Biologically, the circuit synaptic weights could be “learned”  
 194 either over evolutionary time scales, and/or during the animal lifetime.

195 Given a set of  $T$  inputs  $[\mathbf{x}^{(1)}, \dots, \mathbf{x}^{(T)}] = \{\mathbf{x}^{(t)}\}_{t=1\dots T}$  representing the activity patterns of ORN  
 196 somas, the model provides us with the learned connection weights between  $D$  ORNs and  $K$  LNs:  
 197  $\mathbf{W} = [\mathbf{w}_1, \dots, \mathbf{w}_K]$  as well as between LNs:  $\mathbf{M} = \{m_{i,j}\}_{i,j=1\dots K}$ .  $m_{i,i}$  relates to the leak term of LN  
 198  $i$ .  $[\mathbf{w}_1, \dots, \mathbf{w}_K]$  and  $\mathbf{M}$  set the input-output relationship of the circuit and determine the activity  
 199 patterns of ORN axons:  $\{\mathbf{y}^{(t)}\}_{t=1\dots T}$  and LNs:  $\{\mathbf{z}^{(t)}\}_{t=1\dots T}$ . In addition to  $K$ , the number of  
 200 LNs, the model contains only one effective parameter  $\rho$  characterizing the strength of the feedback  
 201 inhibition.

202 We consider two models. First is a Linear Circuit LC- $K$ , (equations (19), arising from the  
 203 unconstrained objective function (18)), for which we derived an analytical solution for  $[\mathbf{w}_1, \dots, \mathbf{w}_K]$ ,  
 204  $\mathbf{M}$ ,  $\{\mathbf{y}^{(t)}\}$ , and  $\{\mathbf{z}^{(t)}\}$  (**Supplementary Information**). Although linearity might be an over-  
 205 simplification of the biological reality, it allows us to build up intuition. Second is a Non-Negative  
 206 Circuit, NNC- $K$ , (equations (20), arising from objective function (18), containing non-negativity  
 207 constraints on the ORN axon and LN activity), which might be more biologically plausible. The  
 208 results below for the NNC arise from numerical simulations.

## 209 Predictions of the ORN - LN connection weight vectors

210 We start by analyzing the prediction of our model in terms of circuit connectivity. In the LC- $K$ , the  
 211  $\{\mathbf{w}_k\}_{k=1\dots K}$  span the subspace of the top  $K$  PCA directions of the input  $\{\mathbf{x}^{(t)}\}$  (**Supplementary**  
 212 **Information**):

$$\mathbf{w}_k = \sum_{i=1}^K a_{k,i} \mathbf{u}_i \quad (1)$$

213 where  $\{\mathbf{u}_i\}_{i=1\dots K}$  are the top  $K$  PCA directions of the dataset  $\{\mathbf{x}^{(t)}\}$ ,  $\{a_{i,j}\}_{i,j=1\dots K}$  are coefficients  
 214 such that all  $\mathbf{w}_k$  are linearly independent. Thus, the  $\mathbf{w}_k$  in the LC do not necessarily correspond  
 215 to specific PCA directions and are not orthogonal, and there is a degree of freedom in the  $\{a_{i,j}\}$ ,  
 216 making the solution of the optimization not unique. Such synaptic organization assure that LNs  
 217 in the LC extract the top  $K$  PCA subspace of the input (below). This structural prediction is  
 218 tested and only partially verified in the data above (**Fig. 3**): the first PCA direction of  $\{\mathbf{x}^{(t)}\}_{\text{data}}$   
 219 significantly aligns with  $\mathbf{w}_{\text{BT}}$ , but there is no full alignment between the connectivity  $\{\mathbf{w}_{\text{LNtype}}\}$   
 220 and activity ORN principal subspaces.

221 Next, we study the predictions of the NNC-4 ( $K = 4$  as the number of LN types). We nu-  
 222 merically optimize the objective function (18) with  $\{\mathbf{x}^{(t)}\}_{t=1\dots T} = \{\mathbf{x}^{(t)}\}_{\text{data}}$  (**Fig. 2A**),  $K = 4$ ,  
 223  $\rho = 1$  and obtain  $\{\mathbf{y}^{(t)}\}$ ,  $\{\mathbf{z}^{(t)}\}$ , and  $[\mathbf{w}_1, \dots, \mathbf{w}_4]$  (**Fig. S6C**). Intuitively, the  $\{\mathbf{w}_k\}$  relate to cluster  
 224 centers in soft K-means or to features in non-negative matrix factorization and the  $z_k^{(t)}$  are the

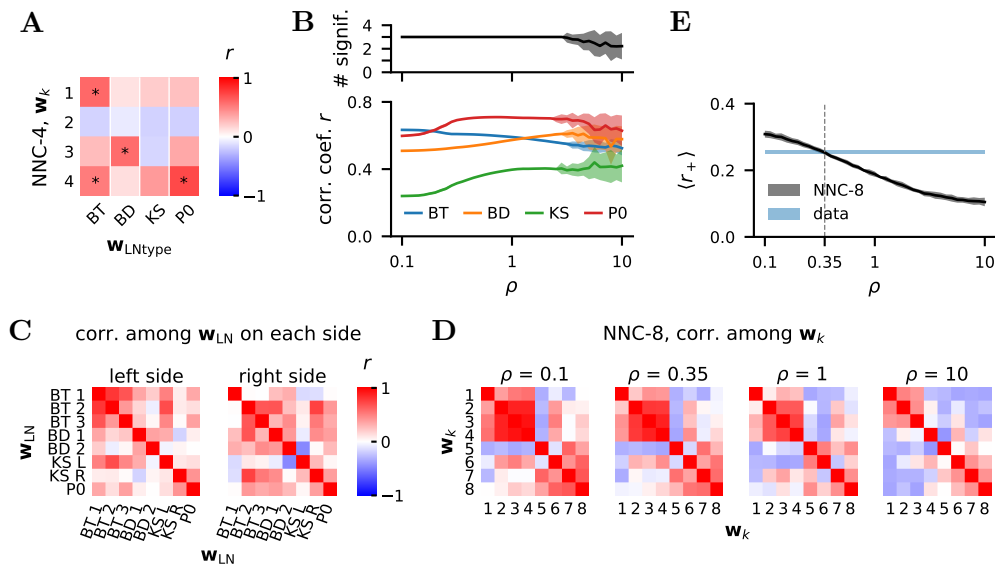

**Fig. 4. Prediction of the connectivity with the NNC and emergence of LN types**

**A** Correlation coefficient  $r$  between the four  $\mathbf{w}_k$  from NNC-4 ( $\rho = 1$ ) and the four  $\mathbf{w}_{LNtype}$  (see also **Fig. S6C,D,F-H**). One-sided p-values were calculated by shuffling the entries of each  $\mathbf{w}_{LNtype}$ . 50,000 permutations used. \*: significance with FDR at 5%.

**B** Bottom: maximum correlation coefficient (mean  $\pm$  s.d.) of the four  $\mathbf{w}_k$  from NNC-4 with the four  $\mathbf{w}_{LNtype}$  for different values of  $\rho$ . Top: number of  $\mathbf{w}_{LNtype}$  significantly correlated with at least one  $\mathbf{w}_k$  from NNC-4 (FDR at 5%). 50 numerical simulations of NNC-4 for each value of  $\rho$ .

**C** Correlation between the  $\mathbf{w}_{LN}$  on the left and right sides of the larva brain.

**D** Same as **(C)** for the eight  $\mathbf{w}_k$  arising from NNC-8 and with  $\rho = 0.1, 0.35, 1, 10$ .  $\mathbf{w}_k$  ordered with hierarchical clustering.

**E** Mean rectified correlation coefficient  $\langle r_+ \rangle$  from **(C)** (blue band delimited by the value for left and right circuit) and from NNC-8 (black line, mean  $\pm$  s.d.). One  $\langle r_+ \rangle$  is obtained by averaging all the rectified values in a matrix in **(C)** or **(D)**, excluding the diagonal. For the NNC-8 and a given value of  $\rho$ , we run 50 simulations. Each simulation can give rise to a different set of  $\mathbf{w}_k$ , we thus plot the mean  $\pm$  s.d. of all the 50  $\langle r_+ \rangle$  for a given  $\rho$ .

225 soft-clustering membership coefficients of  $\mathbf{x}^{(t)}$  (below).

226 Three of the four  $\mathbf{w}_k$  align significantly with the  $\mathbf{w}_{LNtype}$  (BT, BD, and P0, **Fig. 4A**). This  
 227 result is robust for  $\rho < 3.1$  (**Fig. 4B**): all numerical optimization converge to the same  $\{\mathbf{y}^{(t)}\}$ ,  
 228  $\{\mathbf{z}^{(t)}\}$ , and  $\{\mathbf{w}_k\}$  for the input  $\{\mathbf{x}^{(t)}\}_{data}$  and given  $\rho$ . This can partially be attributed to the non-  
 229 negativity constraint in NNC, which removes an intrinsic symmetry of the LC model. Although  
 230  $\mathbf{w}_{KS}$  is the least aligned to the found  $\mathbf{w}_k$ , NNC-5 has one  $\mathbf{w}_k$  aligned with  $\mathbf{w}_{KS}$  too (**Fig. S6H**).  
 231 In summary, the ORN  $\rightarrow$  LN connection weights predicted by the NNC model trained on ORN  
 232 activity data  $\{\mathbf{x}^{(t)}\}_{data}$  largely explain the  $\mathbf{w}_{LNtype}$  of the connectome. Thus, several LNs are  
 233 adapted to statistical features of these ORN activity patterns.

## 234 Emergence of LN groups in the NNC

235 In the connectome LNs are grouped by type and several  $\mathbf{w}_{\text{LN}}$  are similar (**Fig. 1B-D, 4C**). Do LN  
236 groups naturally emerge in our model? In the LC, the  $\{\mathbf{w}_k\}_{k=1\dots K}$  spans a  $K$ -dimensional subspace  
237 (given enough independent dimensions in the input  $\{\mathbf{x}^{(t)}\}$ ). All  $\mathbf{w}_k$  are thus different. Therefore,  
238 in the LC, LN types emerge, but no similar LNs. In the NNC with small  $\rho$ , however, the objective  
239 function (18) leads to the symmetric non-negative matrix factorization (SNMF) objective function  
240 between  $\{\mathbf{x}^{(t)}\}$  and  $\{\mathbf{z}^{(t)}\}$  (**Supplementary Information**), which corresponds to a soft clustering  
241 of  $\mathbf{x}^{(t)}$  by  $\mathbf{z}^{(t)}$ . Thus, each component in  $\mathbf{z}^{(t)}$  discovers and encodes the presence of a sparse feature  
242 of  $\mathbf{x}^{(t)}$  (Pehlevan & Chklovskii, 2015). In that case, when the number of significant sparse features  
243 in  $\{\mathbf{x}^{(t)}\}$  is smaller than  $K$ , several components of  $\mathbf{z}^{(t)}$  (i.e., LNs) encode a similar feature. Our  
244 simulations for NNC-8 ( $K = 8$  as the number of LNs on each side of the larva) with  $\{\mathbf{x}^{(t)}\}_{\text{data}}$  and  
245  $\rho = 0.1$  indeed give rise to groups of similar  $\mathbf{w}_k$  (**Fig. 4D**). Conversely, for larger  $\rho$ , the  $\mathbf{w}_k$  become  
246 more decorrelated (**Fig. 4D,  $\rho = 10$** ). To study how the resemblance of the  $\mathbf{w}_k$  changes with  $\rho$ ,  
247 we calculated the average rectified correlation coefficient  $\langle r_+ \rangle$  between all the  $\mathbf{w}_k$  for different  $\rho$   
248 (**Fig. 4D,E**). At  $\rho = 0.35$ ,  $\langle r_+ \rangle$  of the NNC-8 matched that of the connectome. This value of  $\rho$   
249 should not, however, be interpreted as a “true” value for the actual biological circuit, because the  
250 true ORN activity patterns  $\{\mathbf{x}^{(t)}\}$  that the larva experienced is unknown - in fact changing  $\{\mathbf{x}^{(t)}\}$   
251 and  $\rho$  are two independent means of influencing the model circuit synaptic weights. In summary,  
252 within reasonable parameter ranges, the NNC reproduces yet another property of the biological  
253 circuit: the emergence of LNs that can be grouped by type.

## 254 Relation between LN-LN and feedforward ORNs $\rightarrow$ LN connection weights

255 The ORN - LN circuit also contains inhibitory reciprocal LN - LN connections ( $\mathbf{M} = \{m_{\text{LN}_i, \text{LN}_j}\}$ ,  
256 **Fig. 5A**) whose role is not fully understood. Our model predicts that  $\mathbf{M}$  and  $\mathbf{W} = [\mathbf{w}_1, \dots, \mathbf{w}_K]$   
257 are related thus (**Supplementary Information**):

$$\mathbf{M} \propto \sqrt{\mathbf{W}^\top \mathbf{W}} \quad (2)$$

258 Where  $\top$  is the matrix transpose. This relationship is exact for the LC and approximate for the  
259 NNC. First, it predicts that the matrix  $\mathbf{M}$  is symmetric, i.e., that the synaptic weight of  $\text{LN}_i$   
260  $\rightarrow \text{LN}_j$  is equal to that of  $\text{LN}_j \rightarrow \text{LN}_i$ . This is indeed approximately true in the connectome,  
261 except for the P0, which inhibits KS, but is not strongly inhibited by them (**Fig. 5A**). Second,  
262 as predicted by the relationship (2), we find, in the connectome, a significant correlation between  
263 the entries of  $\mathbf{M}$  and  $\sqrt{\mathbf{W}^\top \mathbf{W}}$  for the left and right sides of the larva (excluding the diagonal  
264 entries, since the connectome does not provide the values corresponding to the diagonal of  $\mathbf{M}$   
265 of the model circuit) (**Fig. 5**). This suggests that the ORN-LN and LN-LN connections are  
266 meticulously co-organized to perform the circuit’s function. Intuitively, LN-LN interaction could  
267 be interpreted as LNs competing with each other for activation. During circuit learning, without

268 LN-LN connections, all LNs would learn the same most significant direction of the input data.  
 269 Thus, these lateral connections ensure that LNs span more than a single direction of the ORN  
 270 activity space. After learning, LN-LN connections constitute an essential part of the computation  
 271 (below, **Fig. S11**).

272 In summary, the NNC model accurately predicts several key features of the connectome: the  
 273  $\mathbf{w}_{\text{LNtype}}$  connection weights, the emergence of LN groups, and the relationship between ORNs  $\rightarrow$   
 LN and LN - LN connections weights.

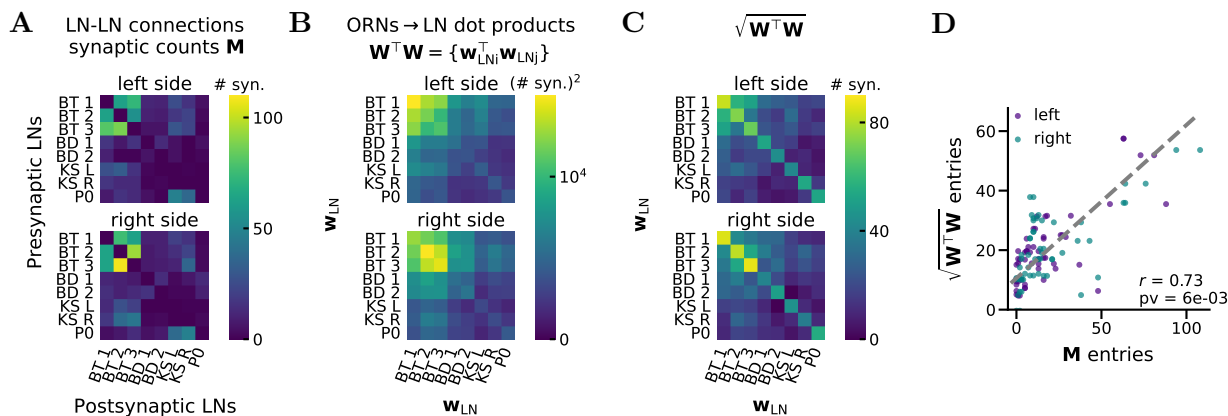

**Fig. 5. Relation between LN-LN ( $\mathbf{M}$ ) and ORNs  $\rightarrow$  LN ( $\mathbf{W}$ ) synaptic counts in the connectome reconstruction**

**A** LN-LN connections synaptic counts  $\mathbf{M}$  on the left and right sides of the larva.

**B**  $\mathbf{W}^T \mathbf{W}$  with  $\mathbf{W} = [\mathbf{w}_{\text{LN}1}, \dots, \mathbf{w}_{\text{LN}8}]$  on the left and right sides. Thus each entry is  $\mathbf{w}_{\text{LN}i}^T \mathbf{w}_{\text{LN}j}$ , the scalar product between 2 ORNs  $\rightarrow$ LN connection weight vectors  $\mathbf{w}_{\text{LN}}$ .

**C**  $\sqrt{\mathbf{W}^T \mathbf{W}}$ , i.e., the square root of the matrices in (**B**).

**D** Entries of  $\mathbf{M}$  vs entries of  $\sqrt{\mathbf{W}^T \mathbf{W}}$ , excluding the diagonal, for both sides.  $r$ : Pearson correlation coefficient. One-sided p-value calculated by shuffling the entries of each  $\mathbf{w}_{\text{LN}}$ .

274

## 275 Computation in the LC: partial equalization of PCA variances in ORN axons and 276 extraction of principal subspace by LNs

277 Next, we examine the computation performed by the LC model. The computation is imple-  
 278 mented dynamically through the ORN - LN loop and converges exponentially to a steady state  
 279 (equation (19)). Given inputs  $\{\mathbf{x}^{(t)}\}$ , we consider the twofold output of the circuit: the con-  
 280 verged representations in ORN axons  $\{\mathbf{y}^{(t)}\}$  and in LNs  $\{\mathbf{z}^{(t)}\}$ , both transmitted downstream.  
 281 Although LNs are usually thought of only performing local computations, here LNs also project  
 282 to several types of neuron like uni- and multi-glomerular PNs (Berck et al., 2016). Because the  
 283 circuit is adapted to its input  $\{\mathbf{x}^{(t)}\}$ , the transformations from  $\mathbf{x}^{(t)}$  to  $\mathbf{y}^{(t)}$  and  $\mathbf{z}^{(t)}$  are related  
 284 to the statistics of  $\{\mathbf{x}^{(t)}\}$  and are naturally expressed using the PCA directions  $\{\mathbf{u}_i\}$  and vari-  
 285 ances  $\{\sigma_{X,i}^2\}$  ( $i = 1, \dots, D$ ) of uncentered  $\{\mathbf{x}^{(t)}\}$ . Formally, given the autocorrelation matrix  
 286  $\Sigma_X := \mathbf{E}[\mathbf{x}^{(t)} \mathbf{x}^{(t)\top}] = \frac{1}{T} \sum_{t=1}^T \mathbf{x}^{(t)} \mathbf{x}^{(t)\top} = \sum_{i=1}^D \sigma_{X,i}^2 \mathbf{u}_i \mathbf{u}_i^\top = \mathbf{U} \Lambda_X^2 \mathbf{U}^\top$ ,  $\sigma_{X,i}^2$  and  $\mathbf{u}_i$  are the eigen-

287 values and eigenvectors of  $\Sigma_X$ , respectively ( $\sigma_{X,i}\sqrt{T} = s_{X,i}$  is also the  $i^{\text{th}}$  singular value of  $\{\mathbf{x}^{(t)}\}$ ),  
 288  $\mathbf{U} = [\mathbf{u}_1, \dots, \mathbf{u}_D]$ , and  $\Lambda_X = \text{diag}(\sigma_{X,1}, \dots, \sigma_{X,D})$ . We write the odor representations in ORN somas  
 289 in this basis and find (**Supplementary Information**):

$$\mathbf{x}^{(t)} = \sum_{i=1}^D v_i^{(t)} \sigma_{X,i} \mathbf{u}_i \quad (3)$$

$$\mathbf{y}^{(t)} = \sum_{i=1}^D v_i^{(t)} \sigma_{Y,i} \mathbf{u}_i = \sum_{i=1}^D \frac{\sigma_{Y,i}}{\sigma_{X,i}} \mathbf{u}_i \mathbf{u}_i^\top \mathbf{x}^{(t)} \quad (4)$$

$$\mathbf{z}^{(t)} = \mathbf{Q} \sum_{i=1}^K v_i^{(t)} \frac{\rho}{\gamma} \sigma_{Y,i} \mathbf{u}_i = \mathbf{Q} \sum_{i=1}^K \frac{\rho}{\gamma} \frac{\sigma_{Y,i}}{\sigma_{X,i}} \mathbf{u}_i \mathbf{u}_i^\top \mathbf{x}^{(t)} \quad (5)$$

290

$$\text{with } \begin{cases} \sigma_{Y,i} (1 + \rho^2 \sigma_{Y,i}^2) = \sigma_{X,i} & 1 \leq i \leq K \\ \sigma_{Y,i} = \sigma_{X,i} & K + 1 \leq i \leq D \end{cases} \quad (6a)$$

$$(6b)$$

291 where  $v_i^{(t)} = \frac{1}{\sigma_{X,i}} \mathbf{u}_i^\top \mathbf{x}^{(t)}$  are the coefficients of  $\mathbf{x}^{(t)}$  in the orthogonal basis  $\{\sigma_{X,i} \mathbf{u}_i\}$  and  $\mathbf{Q}$  is a  
 292  $(K \times K)$  orthonormal (rotation) matrix and is a degree of freedom of the optimization.

293 On the dataset level, we find  $\Sigma_Y = \sum_{i=1}^D \sigma_{Y,i}^2 \mathbf{u}_i \mathbf{u}_i^\top = \mathbf{U} \Lambda_Y^2 \mathbf{U}^\top$  where  $\Lambda_Y = \text{diag}(\sigma_{Y,1}, \dots, \sigma_{Y,D})$ .  
 294 Thus, the activity patterns in ORN axons  $\{\mathbf{y}^{(t)}\}$  have the same principal directions  $\{\mathbf{u}_i\}$  as  $\{\mathbf{x}^{(t)}\}$   
 295 but with modified PCA variances (portrayed in **Fig. 6A,B** with  $D = 2$  and  $K = 1$ ). The variances  
 296 of the last  $D - K$  PCA directions of  $\{\mathbf{x}^{(t)}\}$  remain unaltered in  $\{\mathbf{y}^{(t)}\}$ , whereas the variances of  
 297 top  $K$  directions (as the number of LNs) are diminished according to equation (6a) (**Fig. 6C,D**),  
 298 because LNs ( $\{\mathbf{z}^{(t)}\}$ ) encode (a rotated version of) the top  $K$  principal subspace of  $\{\mathbf{x}^{(t)}\}$  (equation  
 299 (5)) and inhibit it in the ORN axons ( $\{\mathbf{y}^{(t)}\}$ ). From the top  $K$  principal directions, those with  
 300 relatively large variances are shrunk with a cubic root ( $\sigma_{Y,i} \approx \sqrt[3]{\sigma_{X,i}/\rho^2}$ ), whereas those with  
 301 relatively small variance remain virtually unchanged. Indeed, in the latter case, LNs are weakly  
 302 activated and inhibition is almost inexistent.

303 For a LC with the same number of LNs as ORNs (i.e.,  $D = K$ ), this computation leads to a  
 304 flatter spectrum of  $\{\sigma_{Y,i}^2\}$  relatively to the one of  $\{\sigma_{X,i}^2\}$ , which can be quantified by the coefficient  
 305 of variation,  $\text{CV}_\sigma$  (**Supplementary Information**). Although for  $K < D$  only the top  $K$  principal  
 306 direction are shrunk, in most cases it also leads to a decrease of  $\text{CV}_\sigma$  (see below).

307 This computation is a partial (Zero-phase) ZCA-whitening. By definition, a multivariate  
 308 random variable  $\mathbf{A}$  is white if its autocovariance matrix is proportional to the identity matrix:  
 309  $\mathbf{E}[(\mathbf{A} - \mathbf{E}[\mathbf{A}])(\mathbf{A} - \mathbf{E}[\mathbf{A}])^\top] \propto \mathbf{I}$ , which implies that all the PCA variances (i.e., eigenvalues of  
 310 the autocovariance matrix) are equal. For the LC, the  $\text{CV}_\sigma$  of  $\{\sigma_{Y,i}^2\}$  is smaller than the  $\text{CV}_\sigma$   
 311 of  $\{\sigma_{X,i}^2\}$  (see also **Fig. 7E** below). Although these are formally the variances of the PCA on  
 312 uncentered data, because the mean of  $\{\mathbf{x}^{(t)}\}_{\text{data}}$  is close to  $\mathbf{0}$ , flattening the spectrum of  $\{\sigma_i^2\}$   
 313 causes the flattening of the spectrum of the eigenvalues of the autocovariance matrix too, leading  
 314 to partial whitening. Finally, since the principal directions of  $\{\mathbf{y}^{(t)}\}$  and  $\{\mathbf{x}^{(t)}\}$  are the same, the

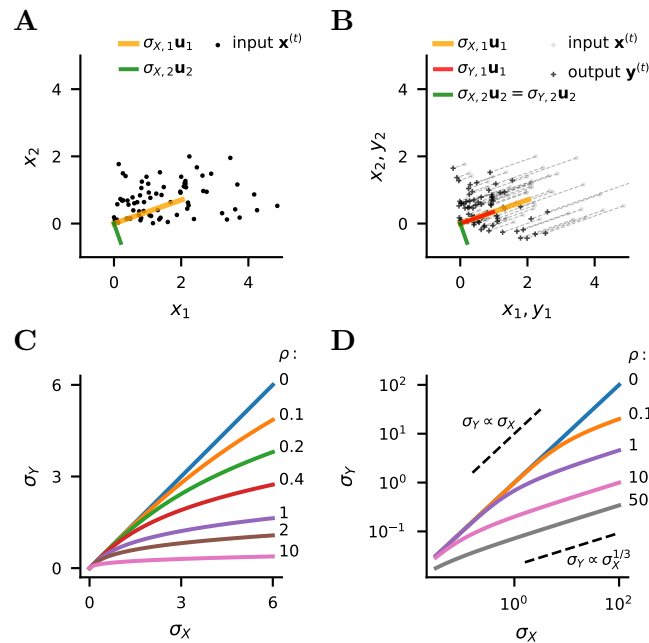

**Fig. 6. Computation in the LC**

**A** Example dataset  $\{\mathbf{x}^{(t)}\}$  with  $D = 2$  generated randomly from a zero-centered multivariate Gaussian and by removing points with negative coordinates. Depicted the PCA directions of  $\{\mathbf{x}^{(t)}\}$  multiplied by the s.d. of that direction.

**B** Transformation from  $\{\mathbf{x}^{(t)}\}$  to  $\{\mathbf{y}^{(t)}\}$  by LC-1 ( $K = 1$ ) with  $\rho = 1$ . Depicted the PCA directions of  $\{\mathbf{x}^{(t)}\}$  and  $\{\mathbf{y}^{(t)}\}$  multiplied by the s.d. of that direction.

**C-D** Transformation of the s.d. of PCA directions from  $\{\mathbf{x}^{(t)}\}$  to  $\{\mathbf{y}^{(t)}\}$  in the LC on linear and logarithmic axes.

315 transformation contains no rotation and is thus “zero-phase”, as ZCA-whitening.

### 316 LC and NNC computation on the ORN activity dataset

317 Finally, to elucidate the computation of this circuit on odor representations, we study the compu-  
 318 tation of the LC and the NNC on  $\{\mathbf{x}^{(t)}\}_{\text{data}}$ . We set the parameter regulating the strength of the  
 319 inhibition  $\rho = 2$  to distinctly portray the input-output transformation. Given the input of ORN  
 320 activities  $\{\mathbf{x}^{(t)}\}_{\text{data}}$ , we calculate  $\{\mathbf{y}^{(t)}\}$  and  $\{\mathbf{z}^{(t)}\}$  with  $K = 1$  and  $K = 8$  using the analytical  
 321 formula for the LC and by optimizing the objective function (18) for the NNC.

322 In the LC, LNs encode the top  $K$  principal subspace of  $\{\mathbf{x}^{(t)}\}$  (above, **Fig. S7B**). In the  
 323 NNC, the computation in LNs approximates SNMF for small  $\rho$  (**Supplementary Information**)  
 324 which performs soft clustering and sparse feature discovery (Pehlevan & Chklovskii, 2015). LNs  
 325 thus encode features of the odor representations in ORN (**Fig. S7C-G**), that are transmitted to  
 326 downstream brain areas.

327 Next we show that in LC and NNC the transformation from  $\{\mathbf{x}^{(t)}\}$  to  $\{\mathbf{y}^{(t)}\}$  is a partial ZCA-  
 328 whitening and a divisive normalization as reflected in the partial equalization of the PCA variances



(**Fig. 7E**), the decrease of channel (i.e., ORN) and pattern (i.e., neural representations of odors) correlations (**Fig. 7J-O, S9**), and the lack of rotation of the output (**Fig. S8E**). **Fig. 7A-C** shows the activity in ORN somas and the computed activity in ORN axons for LC-8 and NNC-8. The LC produces strongly negative values in  $\{\mathbf{y}^{(t)}\}$ , which might not be biologically plausible. We next compared the spectrum of  $\{\sigma_{X,i}^2\}$  and  $\{\sigma_{Y,i}^2\}$ , since this characterizes whitening and the computation in LC affects this aspect (**Fig. 7D**). As expected, in the LC only the top  $K$  principal directions of the input are dampened. For the NNC, however, we find that all directions are dampened, even for  $K = 1$ . This can be attributed to the non-negativity constraint on the output  $\{\mathbf{y}^{(t)}\}$  and  $\{\mathbf{z}^{(t)}\}$  in NNC, which potentially affects all stimuli directions. We find a flattening of  $\{\sigma_{Y,i}^2\}$  spectrum both in LN and NNC as seen in the smaller  $CV_\sigma$  (**Fig. 7E**) demonstrating that  $\{\mathbf{y}^{(t)}\}$  is more white than  $\{\mathbf{x}^{(t)}\}$ . Changing the number of LNs does not affect the NNC as much as the LC. However, changing  $\rho$  greatly influences the strength of the dampening (**Fig. S10**). Although in the LC the principal directions of  $\{\mathbf{x}^{(t)}\}$  and  $\{\mathbf{y}^{(t)}\}$  remain the same, their order changes, because only a fraction of them are shrunken (**Fig. S8A,B**). For the NNC, however, there is only a slight mixing between principal directions of similar strength, but their order mainly remains (**Fig. S8C,D**).

As expected from a flatter  $\{\sigma_{Y,i}\}$ , we observe that channels and patterns are more decorrelated in the output  $\{\mathbf{y}^{(t)}\}$  in the NNC (**Fig. 7J-O**) and in the LC (**Fig. S9**) than in the input, which is coherent with partial whitening. The strength of decorrelation increases with  $\rho$  (**Fig. S10**).

Next, we study the effect of the circuit computation on channel and pattern activity Euclidean norms, which reflect the total channel and total pattern activity. We find that both LC and NNC dampen the channels with strong norms and leave the weaker channels largely unaffected, thus decreasing the CV of channel norms (**Fig. 7F,G**). This allows the information to be more evenly distributed among channels, an important property of efficient coding. Similarly, the circuit partially equalizes the norms of activity patterns (**Fig. 7H,I**). This slightly removes the concentration information from the signal. These effects are similar to a divisive normalization-type computation, also reported in *Drosophila* (Carandini & Heeger, 2012; Olsen et al., 2010).

Finally, we aim at better understanding the role of LN-LN connections. We study the computations performed by the converged LC and NNC, with the off-diagonal elements in  $\mathbf{M}$  set to 0 (**Fig. S11**). We find that this manipulation mixes the output principal direction in relation to the input and also increases the total level of inhibition. Thus, LN-LN connection helps to reduce the amount of rotation in the neural representation, regulate the amount of inhibition, and maintain the predicted computation.

In summary, the analysis of the LC and NNC predicts that the ORN-LN circuit performs the following computation on the odor representation in ORNs: it most strongly dampens the most prominent directions of the input dataset and thus flatten the PCA variance spectrum. This results in an output in ORN axons that is more white, decorrelated, and more equalized channels and patterns. This allows a more efficient neural representation and improves odor discrimination



367 downstream.

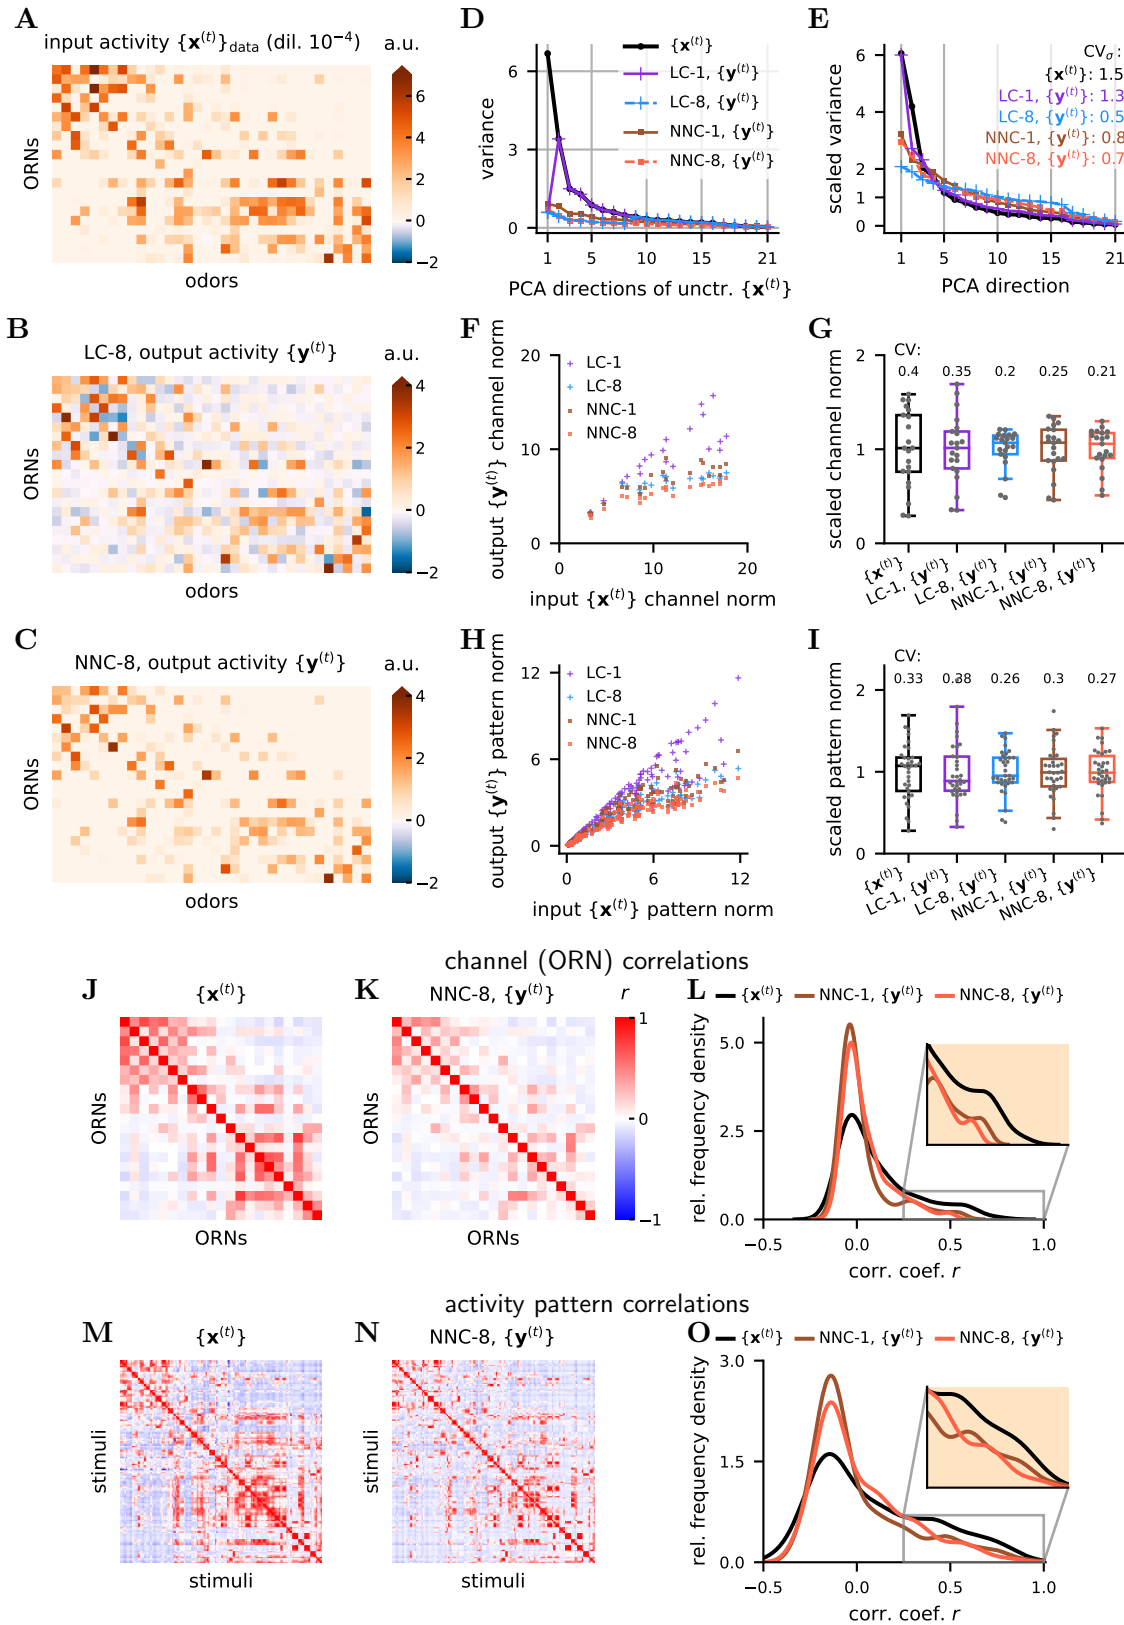

**Fig. 7. Functional consequences of LC and NNC: partial whitening, normalization, decorrelation** (continued on next page)

**Fig. 7.** (continued)

**A** Input (ORN soma) activity patterns  $\{\mathbf{x}^{(t)}\}_{\text{data}}$  for all odors at dilution  $10^{-4}$ . Instead of  $\Delta F/F_0$  as units of activity, we use arbitrary units (a.u.), which stand for appropriate activity units at the neurons level.

**B** Output  $\{\mathbf{y}^{(t)}\}$  for the input of **(A)** for the LC-8.

**C** Same as **(B)** for NNC-8.

**D** Variances of  $\{\mathbf{x}^{(t)}\}_{\text{data}}$  and  $\{\mathbf{y}^{(t)}\}$  in the principal directions of uncentered  $\{\mathbf{x}^{(t)}\}$ .

**E** PCA variances of  $\{\mathbf{x}^{(t)}\}_{\text{data}}$  and  $\{\mathbf{y}^{(t)}\}$ , scaled by their mean.  $\{\mathbf{y}^{(t)}\}$  has a smaller span of variances than  $\{\mathbf{x}^{(t)}\}$ . See **Fig. S8** for the relation between the principal directions of  $\{\mathbf{x}^{(t)}\}_{\text{data}}$  and  $\{\mathbf{y}^{(t)}\}$ .

**F** Euclidean norm of the 21 channels in output  $\{\mathbf{y}^{(t)}\}$  (ORN axons) vs in the input  $\{\mathbf{x}^{(t)}\}_{\text{data}}$  (ORN somas).

**G** Box plot of the channel norms scaled by their mean, CV on top.

**H** Euclidean norm of the 170 activity pattern in output  $\{\mathbf{y}^{(t)}\}$  vs in the input  $\{\mathbf{x}^{(t)}\}_{\text{data}}$ .

**I** Box plot of the activity patterns norms (only for dilution  $10^{-4}$ ) scaled by their mean, CV on top.

**J** ORNs correlations in the input  $\{\mathbf{x}^{(t)}\}_{\text{data}}$ .

**K** ORNs correlations in the output  $\{\mathbf{y}^{(t)}\}$  of the NNC with  $K = 8$ .

**L** Histogram for the channel correlation coefficients from **(J-K)**, excluding the diagonal ( $n=210$ ).

**M** Activity vector (i.e., pattern) correlation in  $\{\mathbf{x}^{(t)}\}_{\text{data}}$ .

**N** Activity vector correlation in  $\{\mathbf{y}^{(t)}\}$  of NNC-8.

**O** Histogram for the pattern correlation coefficients from **(M-N)**, only for dilution  $10^{-4}$  ( $n=561$ ) (see also **Fig. S9**).  $\rho = 2$  in the whole figure.

## 368 Discussion

369 Combining the *Drosophila* larva olfactory circuit connectome, ORN activity data, and a new norma-  
370 tive model, we advance the understanding of sensory computation and adaptation, quantitatively  
371 link ORN activity statistics, functional data and connectome, and make testable predictions. Our  
372 work uncovers and characterizes a simple and potent neural circuit architecture capable of adap-  
373 tive data preprocessing and feature extraction, which, as an independent computational unit, could  
374 arise in other brain areas and be useful for machine learning and signal processing. Finally, our  
375 normative approach provides a general framework to understand circuit computation (Bahroun  
376 et al., 2019; Golkar et al., 2020) and could be applied to more connectomes (Eichler et al., 2017;  
377 Scheffer et al., 2020).

### 378 Circuit computation, partial ZCA-whitening, and divisive normalization

379 We propose that the circuit’s effect on neural odor representation in ORNs correspond to partial  
380 ZCA-whitening and divisive normalization (DN) (**Fig. 6, 7**). Such computations, which reduce  
381 correlations originating from the sensory system and the environment, have appeared in efficient  
382 coding and redundancy reduction theories (Atick & Redlich, 1992; Barlow, 1961; Carandini &  
383 Heeger, 2012; Linsker, 1988; Plumbley, 1993; Simoncelli & Olshausen, 2001). Partial whitening  
384 is indeed a solution for mutual information maximization in the presence of input noise (Atick &  
385 Redlich, 1990). In this circuit too, we suggest that a pure whitening transformation might not be  
386 desirable, as it could lead to noise amplification. Thus, keeping low-variance signal directions of the  
387 input unchanged and damping larger ones might accord with mutual information maximization.  
388 Our conclusions are in line with reports of pattern decorrelation and/or whitening in the olfactory  
389 system in zebrafish (Friedrich, 2013; Friedrich & Laurent, 2001; Friedrich & Wiechert, 2014; Wanner  
390 & Friedrich, 2020) and mice (Giridhar et al., 2011; Gschwend et al., 2015).

391 Infinitely many whitening transformations exist - indeed, a rotated white signal remains white.  
392 ZCA-whitening, where the output is not rotated relatively to the input, might be advantageous over  
393 other flavors of whitening because it is the optimal whitening transform that minimizes the distance  
394 between the original and the whitened signal (Kessy et al., 2018). Since inputs (i.e., spike rates)  
395 are non-negative, this property of ZCA-whitening will reduce the amount of negative deviations  
396 and lessen the distortion of the computation that arises from the non-negative constraint on neural  
397 activity.

398 On the other hand, the computation in our model also resembles DN, a ubiquitous computation  
399 in the brain (Carandini & Heeger, 2012) which was suggested for the analogous circuit in the  
400 adult *Drosophila* (Olsen et al., 2010; Olsen & Wilson, 2008). In its simplest form, DN is defined  
401 as  $Y_j = \gamma \frac{X_j^n}{\sigma^n + \sum_k X_k^n}$ , where  $Y_j$  is the response of the neuron  $j$ ,  $X_i$  is the driving input of the  
402 neuron  $i$ , and  $\gamma$ ,  $\sigma$ , and  $n$  are positive parameters. DN captures two effects of neuronal and circuit  
403 computation: (1) the saturation of a neural response with increasing input up to a maximum spiking

404 rate  $\gamma$ , which mainly arises from neuron's biophysical properties; (2) dampening of the response of a  
405 given neuron when other neurons also receive input, usually originating from lateral inhibition (but  
406 see Sato et al., 2016). In our model, aspect (1) of DN is absent, but could readily be implemented  
407 with a saturating non-linearity. However, signatures of (2) are especially apparent in the saturation  
408 of the pattern output norm for increasing input norm (**Fig. 7H**). This saturation occurs because  
409 inputs with higher norms correspond to inputs at higher odor concentrations and with a higher  
410 number of active ORNs. Because such input directions are more statistically significant in our  
411 dataset, these stimuli that are more strongly dampened by LNs (which encode those directions)  
412 than those with few ORNs active. Thus, our model presents a possible linear implementation of a  
413 crucial aspect of DN, which in itself is a nonlinear operation.

414 The basic form of DN equalizes the channels and performs channel decorrelation, but not pattern  
415 decorrelation (Friedrich & Wiechert, 2014; Olsen et al., 2010; Wanner & Friedrich, 2020), which  
416 appears in our model. However, a modified version of DN, which includes different coefficients for  
417 the driving inputs in the denominator (Westrick et al., 2016), performs pattern decorrelation too,  
418 as seen in our circuit. The proposed neural implementations of DN usually require a multiplication  
419 by the feedback (Heeger, 1992; Westrick et al., 2016), which might not be as biologically realistic  
420 as our circuit implementation.

421 Several neural architectures similar to ours have been proposed to learn to decorrelate channels,  
422 perform DN, or learn sparse representations in an unsupervised manner (Atick & Redlich, 1993;  
423 King et al., 2013; Koulakov & Rinberg, 2011; Olshausen & Field, 1997; Pehlevan & Chklovskii,  
424 2015, 2016; Westrick et al., 2016; Wick et al., 2010; M. Zhu & Rozell, 2015). These studies, however,  
425 either do not have an objective function, or have a different circuit architecture or synaptic learning  
426 rules.

## 427 **Roles of LNs**

428 LNs form a significant part of the neural populations in the brain, have multiple crucial compu-  
429 tational functions, and have extremely diverse morphologies and excitabilities (Chou et al., 2010;  
430 Hattori et al., 2017). We propose a dual role for LNs in this olfactory circuit: altering the odor  
431 representation in ORNs and extracting ORN activity features, which can be used downstream  
432 (Berck et al., 2016). In the olfactory system of *Drosophila* and zebrafish, LNs perform multiple  
433 roles like gain control, normalization of odor representations, pattern and channel decorrelation  
434 (Friedrich, 2013; Friedrich & Wiechert, 2014; Olsen et al., 2010; Olsen & Wilson, 2008; Wanner &  
435 Friedrich, 2020; P. Zhu et al., 2013), roles that are in line with our results. Also, in *Drosophila* the  
436 LN population expands the temporal bandwidth of synaptic transmission and temporally tune PN  
437 responses (Kim et al., 2015; Nagel et al., 2014; Nagel & Wilson, 2016), which was not addressed  
438 here.

439 In topographically organized circuits such as visual periphery or auditory cortex, several LN  
440 types uniformly tile the topographic space and each LN type has its own role and selectivity (e.g., in

441 the retina (Masland, 2012)). In non-topographically organized networks, however, the organization  
442 and selectivity of LNs is still a matter of research and controversy (Chou et al., 2010; Hong &  
443 Wilson, 2015). We have included 4 LN types in the studied subcircuit (**Fig. 1**). Several LN types  
444 contains multiple copies of LNs, with similar connection weights, and thus presumably similar  
445 roles. In the LC model, the  $K$  LNs span a  $K$ -dimensional subspace of activity, thus each LN has  
446 a different connectivity and would form a type of its own. In the NNC model, large  $\rho$  lead to  
447 different LNs, whereas smaller  $\rho$  lead to the formation of LN groups (**Fig. 4C-E**). Thus based on  
448 our study and the different connectivity patterns of LNs in the connectome (Berck et al., 2016),  
449 we suggest that in the *Drosophila* larva LN types extract different features of ORN activity and  
450 are thus differently activated in response to different input directions (and glomeruli) and also  
451 different ORNs are differently inhibited by different LNs. This seems at odds with the results of  
452 Hong and Wilson, 2015 who found that the activation of the LN population appears invariant to  
453 odor identity. However, the latter study imaged several LNs simultaneously and thus might have  
454 missed the selectivity of individual LNs.

455 What are the features being extracted by LNs? The Broad Trio, whose connection weight  
456 vector aligns to the first PCA direction of ORN activity and to a  $\mathbf{w}$  of the NNC model (**Fig. 3,**  
457 **4A,B**), could potentially encode the mean ORN activity, and thus be related to the global odor  
458 concentration (Asahina et al., 2009). Other LNs, whose connectivity aligns with the  $\mathbf{w}$  of the  
459 NNC model, might encode features of odors, like aromatic vs long carbon chain (Si et al., 2019), or  
460 specific information influencing larva behavior (Berck et al., 2016). What is the function of multiple  
461 “copies” of LNs within each type? Firstly, LNs might differentiate further as the larva grows, and  
462 as the circuit continues learning. Secondly, several LNs might help expand the dynamical range of  
463 a single LN.

464 The connectome reveals that the circuit also includes LN-LN connections, which arise naturally  
465 in our approach. We suggest that LN-LN connections constitute a crucial part of learning and LN  
466 differentiation, as well as performing partial ZCA-whitening and normalization. Our model also  
467 correctly predicted how LN-LN connections co-organize with the ORN-LN connections (**Fig. 5**).  
468 To our knowledge, the role of LN-LN connections and their relationship to ORN-LN connections  
469 has not been addressed previously in such circuits.

470 In summary, our study highlights the significance of the different ORN-LN and LN-LN connec-  
471 tion strengths and argues that LNs are minutely selective and organized to extract features and  
472 render the representation of odors more efficient.

### 473 **Learning and ORN activity statistics**

474 Using ORN activity dataset (Si et al., 2019), our NNC model could predict to a large extent the  
475 connection weight vectors found in the connectome (**Fig. 4A-B**). This suggests that the circuit  
476 is adapted to ORN activity patterns (**Fig. 2, 3, 4**). How could the connectivity prediction be  
477 successful, when the ORN activity dataset was mainly chosen to uniformly and broadly activate all

478 ORNs and not to match the true larva odor environment, in terms of odor identity, frequency, and  
479 intensity? One possibility is that, given an ORN activity dataset large enough, certain generic cor-  
480 relations between ORNs always appear, giving rise to the same robust features in the connectivity.  
481 These correlations could be caused by intrinsic chemical properties of ORN receptors. Moreover,  
482 the exact odor statistics would also alter the connection weights, but to a lesser extent than the  
483 former effect. Thus, given an activity dataset closely mimicking the larva natural odor environment,  
484 the model predictions of the connectome might further improve.

485 Are those synaptic weights learned during the animal lifetime or are they encoded genetically,  
486 i.e., “learned” over an evolutionary time span? A genetic origin is undoubtedly present, given  
487 that several LNs types (e.g., Keystone and Picky) differ by their connectivity to specific neurons  
488 outside the studied circuit and seem to be linked to different hard-wired animal behaviors (Berck  
489 et al., 2016). Additionally, several studies reveal that glomeruli sizes (and thus ORN-LN or ORN-  
490 PN synaptic weights) or activity vary depending on the environment where the *Drosophila* grows  
491 up (Arenas et al., 2012; Das et al., 2011; Devaud et al., 2001; Sachse et al., 2007; Sudhakaran  
492 et al., 2012). This feature would equip the circuit with a potent mechanism to adapt to evolving  
493 natural environment. Additionally, synaptic count and innervation variability arises for *Drosophila*  
494 brought up in similar environments (Chou et al., 2010; Tobin et al., 2017), indicating the potential  
495 imprecision of the development and/or learning. Resolving connectomes of larva raised in different  
496 odor environments, probing the synaptic plasticity present in the network, and recording ORN  
497 responses to the full ensemble of odors present in its environment would help clarify the influence  
498 of learning and of genetics.

499 In conclusion, our work uncovers a canonical circuit model that could robustly adapt to different  
500 environments in an unsupervised manner, while maintaining the critical computations of partial  
501 whitening, normalization, and feature extraction. Our comprehensive normative approach, which  
502 contains only one effective parameter, predicted the structural organization based on input activity,  
503 and found in the connectome the signatures of circuit function and adaptation to ORN pattern  
504 statistics. Such an approach could provide important insights into more complicated adaptive  
505 neural circuits, whose structural and activity data is becoming available.



## 506 Methods

### 507 ORN activity

508 We use the average maximal  $\text{Ca}^{2+} \Delta F/F_0$  responses among trials for the activity data as in Si  
 509 et al., 2019. For the ORN 85c in response to 2-heptanone, and for the ORN 22c in response to  
 510 methyl salicylate, we only have responses to dilutions  $\leq 10^{-7}$ . Because the ORN responses are  
 511 very similar for dilutions  $10^{-7}$  and  $10^{-8}$  and are already saturated (for this cell we have responses  
 512 down to dilutions of  $10^{-11}$ ), we set the missing response for dilutions  $10^{-6}$ ,  $10^{-5}$  and  $10^{-4}$  as the  
 513 response for  $10^{-7}$ .

### 514 RCF distribution of correlation coefficient and significance testing

515 Given a vector  $\mathbf{a} \in \mathbb{R}^D$ , we define the mean  $\bar{a}$ , the centered vector  $\mathbf{a}_c$ , and the centered normalized  
 516 vector  $\hat{\mathbf{a}}$ :

$$\bar{a} := \frac{1}{D} \sum_{i=1}^D a_i \quad (7)$$

$$\mathbf{a}_c := \mathbf{a} - \bar{a} \quad (8)$$

$$\hat{\mathbf{a}} := \frac{\mathbf{a}_c}{\|\mathbf{a}_c\|} \quad (9)$$

517 We call  $\hat{\mathbf{w}} \in \mathbb{R}^D$  the centered and normalized ORNs  $\rightarrow$  LN synaptic weight vector  $\mathbf{w}$ . Similarly, we  
 518 define  $\hat{\mathbf{X}} \in \mathbb{R}^{D \times T}$  the centered and normalized ORN activity  $\mathbf{X}_{\text{data}} = [\mathbf{x}^{(1)}, \dots, \mathbf{x}^{(T)}]$ , where each  
 519 column vector is centered and normalized.

520 Each row of the matrix of correlation coefficients depicted in **Fig. 2E** is given by  $\mathbf{c} := \hat{\mathbf{w}}_{\text{LNtype}}^\top \hat{\mathbf{X}}$ .  
 521  $\mathbf{c}$  is used to calculate the true relative cumulative frequency (RCF) of correlation coefficients in  
 522 **Fig. 2G**:  $\text{RCF}_c(x) := \frac{1}{T} \sum_{i=1}^T \mathbf{1}_{[-1,x]}(c_i)$ , where  $\mathbf{1}_A(y)$  is the indicator function of a given set  $A$ .

523 We define the random variables  $\mathbf{w}'$ ,  $\mathbf{c}'$  and  $\text{RCF}'$ .  $\mathbf{w}'$  is generated by shuffling the entries of a  
 524 connectivity vector  $\hat{\mathbf{w}}$ :

$$w'_i := w_{\sigma(i)} \quad (10)$$

$$\mathbf{c}' := \hat{\mathbf{w}}'^\top \hat{\mathbf{X}} \quad (11)$$

$$\text{RCF}'_c(x) := \frac{1}{T} \sum_{i=1}^T \mathbf{1}_{[-1,x]}(c'_i) \quad (12)$$

525 Where  $\sigma(i)$  is a random permutation operator. We define  $\overline{\text{RCF}}'(x)$  (**Fig. 2G**, black line) as the  
 526 mean  $\text{RCF}'(x)$  arising from all RCFs that come from shuffled  $\hat{\mathbf{w}}$ . Next, we define, the maximum

527 negative deviation  $\delta'$  random variable as:

$$\delta' := \max_x \left[ \overline{RCF'}(x) - RCF'(x) \right] \quad (13)$$

528 Finally, we define p-value =  $\Pr(\delta' \geq \delta_{true})$ . The p-value is thus the proportion of RCFs generated  
529 with random shuffling of entries of  $\widehat{\mathbf{w}}$  that deviate from the mean RCF more than the true RCF.

530 Numerically, these calculations were done by binning the RCF function into 0.02 bins and  
531 generating 10000 instances of shuffled  $\widehat{\mathbf{w}}$ .

### 532 **Number of aligned dimensions between two subspaces**

533 Given a Hilbert space of dimension  $D$ , we define  $\Omega$  - a measure of dissimilarity between 2 subspaces  
534  $\mathbf{S}_A$  and  $\mathbf{S}_B$  generated by the matrices of linearly independent  $K_A$  and  $K_B$  column vectors:  $\mathbf{A} \in$   
535  $\mathbb{R}^{D \times K_A}$  and  $\mathbf{B} \in \mathbb{R}^{D \times K_B}$ :

$$\Omega := \|\mathbf{P}_A - \mathbf{P}_B\|_F^2 \quad (14)$$

$$= \text{Tr}[\mathbf{P}_A^2] + \text{Tr}[\mathbf{P}_B^2] - 2 \text{Tr}[\mathbf{P}_A \mathbf{P}_B] = \dim[\mathbf{S}_A] + \dim[\mathbf{S}_B] - 2 \text{Tr}[\mathbf{P}_A \mathbf{P}_B] \quad (15)$$

$$= K_A + K_B - 2 \text{Tr}[\mathbf{P}_A \mathbf{P}_B] \quad (16)$$

536 Where  $\mathbf{P}_A, \mathbf{P}_B \in \mathbb{R}^{D \times D}$  are the projectors onto the subspaces  $S_A$  and  $S_B$ , respectively,  $F$  stands for  
537 the Frobenius norm,  $\text{Tr}$  is the matrix trace, and  $K_X = \dim(\mathbf{S}_X)$  is the dimensionality of a subspace  
538  $S_X$ . We assume  $K_A + K_B \leq D$ . We have that  $|K_A - K_B| \leq \Omega \leq K_A + K_B$ . The projection matrix  
539 can be obtained thus  $\mathbf{P}_A = \mathbf{A}(\mathbf{A}^\top \mathbf{A})^{-1} \mathbf{A}^\top$ , or via QR factorization:  $\mathbf{Q}\mathbf{R} = \mathbf{A}$ ,  $\mathbf{P}_A = \mathbf{Q}\mathbf{Q}^\top$ .

540 Intuitively, for two very similar subspaces, the projection  $\mathbf{P}_A v$  of an arbitrary vector  $v$  onto  $S_A$   
541 will be very similar to the projection  $\mathbf{P}_B v$  vector  $v$  onto  $S_B$ , thus  $\mathbf{P}_A v \approx \mathbf{P}_B v$  and  $\Omega$  will be small.  
542 Conversely, if the subspaces are very different, the projections  $\mathbf{P}_A v$  and  $\mathbf{P}_B v$  will also be different  
543 and  $\Omega$  will be large.

544 We now define the more intuitive measure:

$$\Gamma := (K_A + K_B - \Omega) / 2 \quad (17)$$

545 which is a proxy of the number of aligned dimensions in the two subspaces. Indeed  $0 \leq \Gamma \leq$   
546  $\min(K_A, K_B)$ . For 2 perpendicular subspaces,  $\Gamma = 0$  and for 2 fully aligned subspaces  $\Gamma =$   
547  $\min(K_A, K_B)$ .

548 In the main text we have  $\mathbf{A} = [\mathbf{w}_{BT}, \mathbf{w}_{BD}, \mathbf{w}_{KS}, \mathbf{w}_{P0}]$  and  $\mathbf{B}$  is the matrix with the top 5 PCA  
549 loading vectors of  $\{\mathbf{x}^{(t)}\}$  as columns,  $K_A = \dim[\mathbf{S}_A] = 4$ ,  $K_B = \dim[\mathbf{S}_B] = 5$  and  $D = 21$ .

## 550 Objective function for the ORN-LN circuit

551 We choose a normative-theoretical approach to study the ORN-LN circuit. It has the advantage  
 552 of providing analytical expressions describing different aspects of the computation and the circuit  
 553 architecture. Studying the circuit’s computation is then equivalent to studying the optimum of a  
 554 cost function.

555 We first define the following variables: an input  $\mathbf{X} = [\mathbf{x}^{(1)}, \dots, \mathbf{x}^{(T)}]$  of  $T$  samples, and outputs  
 556  $\mathbf{Y} = [\mathbf{y}^{(1)}, \dots, \mathbf{y}^{(T)}]$ ,  $\mathbf{Z} = [\mathbf{z}^{(1)}, \dots, \mathbf{z}^{(T)}]$ .  $\mathbf{x}^{(t)}$  and  $\mathbf{y}^{(t)}$  are  $D$ -dimensional vectors, whereas  $\mathbf{z}^{(t)}$  are  
 557  $K$ -dimensional.  $\mathbf{x}^{(t)}$ ,  $\mathbf{y}^{(t)}$ , and  $\mathbf{z}^{(t)}$  represent the activity of ORN somas (i.e., the inputs), ORN  
 558 axons and  $K$  LNs, respectively. We postulate the following similarity-based objective function (e.g.,  
 559 Pehlevan et al., 2018), which links the steady state activity of the outputs to that of the input:

$$\mathcal{L} = \min_{\mathbf{Y} \geq 0} \max_{\mathbf{Z} \geq 0} \frac{1}{T^2} \left( \frac{T}{2} \|\mathbf{X} - \mathbf{Y}\|_F^2 - \frac{\rho^2}{4} \left\| \mathbf{Y}^\top \mathbf{Y} - \frac{\gamma^2}{\rho^2} \mathbf{Z}^\top \mathbf{Z} \right\|_F^2 + \frac{\rho^2}{4} \|\mathbf{Y}^\top \mathbf{Y}\|_F^2 \right) \quad (18)$$

560 Intuitively this objective function drives the activity of the ORN axons  $\mathbf{Y}$  to be close to the activity  
 561 of ORN somas  $\mathbf{X}$  through the term  $\|\mathbf{X} - \mathbf{Y}\|_F^2$ , it aligns the similarity between the activity of ORN  
 562 axons and LNs through the term  $\left\| \mathbf{Y}^\top \mathbf{Y} - \frac{\gamma^2}{\rho^2} \mathbf{Z}^\top \mathbf{Z} \right\|_F^2$ , and finally puts a 4<sup>th</sup> order penalty on the  
 563 norm of  $\mathbf{Y}$  through the term  $\|\mathbf{Y}^\top \mathbf{Y}\|_F^2$ .  $\rho$  and  $\gamma$  are two parameters. Scaling  $\rho$  is related to the  
 564 strength of the dampening in  $\mathbf{Y}$  and affects both the optima of  $\mathbf{Y}$  and  $\mathbf{Z}$ . Changing  $\gamma$  only scales  
 565  $\mathbf{Z}$ , without affecting  $\mathbf{Y}$ . Since  $\gamma$  does not fundamentally change the computation, we set  $\gamma = 1$  in  
 566 the whole paper.

567 We consider two objective functions. One without the non-negativity constraints on  $\mathbf{Y}$  and  
 568  $\mathbf{Z}$ , representing the Linear Circuit (LC) model, and one with the non-negativity constraints as in  
 569 equation (18), representing the Non-Negative Circuit (NNC) model. Non-negativity constraints  
 570 account for the fact that neural activity is usually non-negative, or at least not symmetric in the  
 571 negative and positive directions.

572 In order to map the objective function to a neural circuit (**Supplementary Information**),  
 573 we first introduce two auxiliary matrices  $\mathbf{W} = \frac{1}{T} \mathbf{Y} \mathbf{Z}^\top$  and  $\mathbf{M} = \frac{1}{T} \mathbf{Z} \mathbf{Z}^\top$ , which naturally map  
 574 onto ORNs - LNs and LNs - LNs synaptic weights, respectively. The objective function is thus  
 575 optimized over the variables  $\mathbf{Y}$ ,  $\mathbf{Z}$ ,  $\mathbf{W}$ , and  $\mathbf{M}$ . We then consider the objective function in the  
 576 “online setting”. In this situation one  $\mathbf{x}^{(t)}$  is presented at a time, the optimal  $\mathbf{y}^{(t)}$  and  $\mathbf{z}^{(t)}$  are  
 577 found with the current  $\mathbf{W}$  and  $\mathbf{M}$ , and subsequently the  $\mathbf{W}$  and  $\mathbf{M}$  are updated. The optimal  $\mathbf{y}^{(t)}$   
 578 and  $\mathbf{z}^{(t)}$  are found with gradient descent/ascent equations, which also correspond to the ORN-LN  
 579 neural dynamics equations ((19) for the LC or (20) for the NNC). The gradient descent/ascent  
 580 steps on  $\mathbf{W}$  and  $\mathbf{M}$  correspond to the Hebbian learning update rules equation (21).

## 581 Circuit neural dynamics

582 When optimized online, the objective function (18) without the non-negativity constraints gives rise  
 583 to the following differential equations describing the LC, whose steady state solutions correspond  
 584 to the optima for  $\mathbf{y}^{(t)}$  and  $\mathbf{z}^{(t)}$  (**Supplementary Information**). These equations naturally map  
 585 onto the ORN-LN neural circuit dynamics (dropping the sample index  $t$  for simplicity of notation):

$$\begin{cases} \tau_y \frac{d\mathbf{y}(\tau)}{d\tau} = -\mathbf{y}(\tau) - \gamma^2 \mathbf{W} \mathbf{z}(\tau) + \mathbf{x} \\ \tau_z \frac{d\mathbf{z}(\tau)}{d\tau} = -\mathbf{M} \mathbf{z}(\tau) + \rho^2 / \gamma^2 \mathbf{W}^\top \mathbf{y}(\tau) \end{cases} \quad (19)$$

586 Where  $\mathbf{x}$ ,  $\mathbf{y}$  and  $\mathbf{z}$  are  $D$ ,  $D$ , and  $K$ -dimensional vectors, and represent the activity (e.g., spiking  
 587 rate) of the ORN somas, ORN axons, and LNs, respectively.  $\tau_y$  and  $\tau_z$  are neural time constants,  
 588  $\tau$  is the local time evolution (not to be confused with the  $t$  sample index). The elements of the  
 589  $D \times K$  matrices  $\rho^2 / \gamma^2 \mathbf{W}$  and  $\gamma^2 \mathbf{W}$  contain the synaptic weights of the feedforward ORNs  $\rightarrow$  LN  
 590 and feedback LN  $\rightarrow$  ORNs connections, respectively. Thus, the feedforward connection vectors are  
 591 proportional to the feedback vectors, with a scaling factor  $\rho^2 / \gamma^4$ . This assumption is reasonable  
 592 considering the connectivity data (**Fig. S1, S2B**). Off-diagonal elements of the  $K \times K$  matrix  $\mathbf{M}$   
 593 contain the weights of LN - LN inhibitory connections, whereas the diagonal elements are related  
 594 to the LNs leak. In the absence of LN activity and at steady state, the equations satisfy  $\mathbf{y} = \mathbf{x}$ ,  
 595 i.e., ORN soma and axonal activities are identical. In the absence of input (i.e.,  $\mathbf{x} = \mathbf{0}$ ) both  $\mathbf{y}$  and  
 596  $\mathbf{z}$  decay exponentially to  $\mathbf{0}$ , because of the terms  $-\mathbf{y}(\tau)$  and  $-M_{i,i} z_i(\tau)$ , respectively. In summary,  
 597 these equations effectively model the ORN-LN circuit dynamics by implementing that (1) the ORN  
 598 axonal activity is driven by the input in ORN somas  $\mathbf{x}$  and inhibited by the feedback from the LNs  
 599 through the term  $-\gamma^2 \mathbf{W} \mathbf{z}(\tau)$  and (2) LN activity is driven by the activity in ORN axonal terminals  
 600 by  $\rho^2 / \gamma^2 \mathbf{W}^\top \mathbf{y}(\tau)$  and inhibited by LNs through the term  $-\mathbf{M} \mathbf{z}(\tau)$ .  $\rho$  and  $\gamma$  are two parameters.  
 601 In fact, a general system of differential equations describing this circuit architecture can be reduced  
 602 to having just two parameters (**Supplementary Information**). Scaling  $\rho$  affects both the steady  
 603 state solution of  $\mathbf{y}$  and  $\mathbf{z}$ , whereas scaling  $\gamma$  only scales  $\mathbf{z}$ . Note that changing  $\rho$  in the objective  
 604 function, will also give rise to different optimal  $\mathbf{W}$  and  $\mathbf{M}$ .

605 When optimized online, the objective function (18) with the non-negativity constraints gives  
 606 rise to the following equations describing the NNC:

$$\begin{cases} \mathbf{y}(\tau + 1) = \max \left[ \mathbf{0}, \mathbf{y}(\tau) + \epsilon(\tau) (-\mathbf{y}(\tau) - \gamma^2 \mathbf{W} \mathbf{z}(\tau) + \mathbf{x}) \right] \\ \mathbf{z}(\tau + 1) = \max \left[ \mathbf{0}, \mathbf{z}(\tau) + \epsilon(\tau) (-\mathbf{M} \mathbf{z}(\tau) + \rho^2 / \gamma^2 \mathbf{W}^\top \mathbf{y}(\tau)) \right] \end{cases} \quad (20)$$

607 Where  $\epsilon(\tau)$  is the step size parameter and the max is performed component wise. Here  $\tau$  is a discrete  
 608 time variable. These equations can be seen as the equivalent to equations (19), but also satisfying  
 609 constraints on the activity, such as  $y_i(\tau) \geq 0, z_i(\tau) \geq 0, \forall \tau, i$ . Such constraints are implemented  
 610 by formulating circuit dynamics in discrete time and using a projected gradient descent.

611 We call LC- $K$  the linear circuit implemented by (19) and NNC- $K$  the non-negative circuit  
612 implemented by (20), with  $K$  LNs. The actual biological circuit might exhibit a behavior somewhere  
613 between the LC and NNC. For the circuit studied here, we have  $D = 21$  (number of ORNs), and  
614  $K = 8$  (number of LNs on one side of the larva) or  $K = 4$  (number of LN types) or  $K = 1$  (to build  
615 intuition).

## 616 Mathematical description of synaptic plasticity

617 When the objective function (18) is optimized online, we obtain the following updates for  $\mathbf{W}$  and  
618  $\mathbf{M}$  after each presentation of a sample  $\mathbf{x}^{(t)}$  and convergence to optimal  $\mathbf{y}^{(t)}$  and  $\mathbf{z}^{(t)}$ :

$$\begin{aligned}\mathbf{W}^{(t+1)} &= \mathbf{W}^{(t)} + \epsilon_1(t) \left( \mathbf{y}^{(t)} \mathbf{z}^{(t)\top} - \mathbf{W}^{(t)} \right) \\ \mathbf{M}^{(t+1)} &= \mathbf{M}^{(t)} + \epsilon_2(t) \left( \mathbf{z}^{(t)} \mathbf{z}^{(t)\top} - \mathbf{M}^{(t)} \right)\end{aligned}\tag{21}$$

619 Where  $\epsilon_i(t)$  are learning rates. We assume that the ORN soma activation  $\mathbf{x}^{(t)}$  in present long  
620 enough so that  $\mathbf{y}^{(t)}(\tau)$  and  $\mathbf{z}^{(t)}(\tau)$  reach steady state values. These equations represent Hebbian  
621 plasticity in  $\mathbf{W}$  and  $\mathbf{M}$ , which is a form of correlative unsupervised learning. This is justified by  
622 (1) the adaptation of the connectivity to statistics of the ORN activity found in our data, (2)  
623 the presence of activity-dependent plasticity in *Drosophila* (Arenas et al., 2012; Das et al., 2011;  
624 Devaud et al., 2001; Sachse et al., 2007; Sudhakaran et al., 2012), and (3) that glomeruli activity  
625 is best explained with glomerulus-glomerulus inhibitory connectivity that is proportional to the  
626 correlation between glomeruli (Linster et al., 2005). These equations (21) set the diagonal values  
627 of  $\mathbf{M}$  by analogy to the off-diagonal ones.

628 With appropriate learning rates, these synaptic update rules lead to:

$$\mathbf{W} \rightarrow \mathbf{E} \left[ \bar{\mathbf{y}} \bar{\mathbf{z}}^\top \right], \quad \mathbf{M} \rightarrow \mathbf{E} \left[ \bar{\mathbf{z}} \bar{\mathbf{z}}^\top \right]\tag{22}$$

629 Such  $\mathbf{W}$  and  $\mathbf{M}$  could potentially arise either over evolutionary time scales, or during the animal  
630 lifetime. In summary, based on the postulated objective function (18), we derived neural dynamics  
631 equation (equations (19) for LC, (20) for NNC) which map onto the ORN-LN circuit and biologically  
632 plausible Hebbian synaptic plasticity rules (equations (21)). This fully specifies the circuit, its  
633 synaptic weights, and its input-output relationship.

## 634 Numerical simulation of the LC offline

635 For the LC, we have the theoretical solution, so numerical simulations are not necessary to obtain  $\mathbf{Y}$ .  
636 Also, there is a degeneracy in the solutions of  $\mathbf{Z}$ ,  $\mathbf{W}$ , and  $\mathbf{M}$ . However, to confirm the theoretical  
637 results, we did simulate the LC too. For that, we used the following equation, where the cost

638 function depends on  $\mathbf{Z}$  only (**Supplementary Information**, equation (S49), with  $\gamma = 1$ ):

$$\mathcal{L} = \min_{\mathbf{Z}} \frac{1}{T^2} \text{Tr} \left[ \frac{T}{2} \mathbf{X}^\top \mathbf{X} \left( \mathbf{I}_T + \frac{1}{T} \mathbf{Z}^\top \mathbf{Z} \right)^{-1} + \frac{1}{4\rho^2} \mathbf{Z}^\top \mathbf{Z} \mathbf{Z}^\top \mathbf{Z} \right] \quad (23)$$

639 We used an algorithm similar to Kuang et al., 2012.

---

**Algorithm 1** Finding the minimum of

$$f(\mathbf{Z}) = \text{Tr} \left[ \frac{T}{2} \mathbf{X}^\top \mathbf{X} \left( \frac{\mathbf{Z}^\top \mathbf{Z}}{T} + \mathbf{I}_T \right)^{-1} + \frac{1}{4\rho^2} \mathbf{Z}^\top \mathbf{Z} \mathbf{Z}^\top \mathbf{Z} \right]$$


---

- 1: **Objective:** find  $\mathbf{Z} \in \mathbb{R}^{K \times T}$  that minimizes  $f(\mathbf{Z})$ .
  - 2: **Inputs:**
  - 3:  $\mathbf{X} \in \mathbb{R}^{D \times T}$
  - 4:  $K > 0$ : the number of dimensions of  $\mathbf{Z}$
  - 5:  $\rho > 0$ : a constant encoding the strength of the inhibition by the LNs
  - 6:  $0 < \sigma < 1$ : acceptance parameter (usually 0.1)
  - 7:  $\alpha_0 > 0$ : initial gradient step coefficient (usually 1)
  - 8:  $0 < \beta < 1$ : reduction factor (usually 0.1)
  - 9:  $0 < \mu \ll 1$ : tolerance parameter (usually  $\approx 10^{-6}$ )
  - 10:  $n_{cycle} \approx 500$ : number of steps after which one decreases the value of  $\alpha_0$
  - 11: **Initialize:**
  - 12:  $\mathbf{Z}_{new} \in \mathbb{R}^{K \times N} \sim \mathcal{N}(0, \text{s. d.}(\mathbf{X})/100)$
  - 13:  $i \leftarrow 1$
  - 14: **Iterate:**
  - 15: **repeat**
  - 16:      $\mathbf{Z} \leftarrow \mathbf{Z}_{new}$
  - 17:      $\alpha = \alpha_0$
  - 18:     **repeat**
  - 19:          $\mathbf{Z}_{new} = \mathbf{Z} - \alpha \nabla f(\mathbf{Z})$      ▷ Find a potential new  $\mathbf{Z}$  through a gradient descent step
  - 20:          $\widehat{\Delta}f = \sigma \cdot \text{sum}[\nabla f(\mathbf{Z}) \odot (\mathbf{Z}_{new} - \mathbf{Z})]$      ▷ Acceptable decrease in  $f$  (negative number)
  - 21:          $\Delta f = f(\mathbf{Z}_{new}) - f(\mathbf{Z})$      ▷ True decrease in  $f$  (negative number)
  - 22:          $\alpha \leftarrow \beta \alpha$      ▷ Decrease the gradient descent step size for the next iteration, if it occurs
  - 23:     **until**  $\Delta f < \widehat{\Delta}f$      ▷ Exit loop if the true decrease in  $f$  is larger than the acceptable one
  - 24:     **if**  $i \bmod n_{cycle} = 0$  **then**     ▷ Every  $n_{cycle}$ , decrease the initial step size  $\alpha_0$  by  $\beta$
  - 25:          $\alpha_0 \leftarrow \beta \alpha_0$
  - 26:     **end if**
  - 27:      $i \leftarrow i + 1$
  - 28: **until**  $|f(\mathbf{Z}) - f(\mathbf{Z}_{new})|/|f(\mathbf{Z})| < \mu$
  - 29: **Output:**  $\mathbf{Z}_{new}$
-

640 Where  $\odot$  is an element-wise multiplication and the “sum” adds all the elements of the matrix.  
 641 In the inner repeat loop of the algorithm, it can happen that because of limited numerical precision,  
 642 no  $\alpha$  is small enough to make a decrease in  $f$  (i.e., satisfy the condition  $\Delta f < \widehat{\Delta f}$ ), in that case  
 643 the inner and outer repeat loops stop and the current  $\mathbf{Z}$  (not  $\mathbf{Z}_{new}$ ) is outputted.

644  $\nabla f(\mathbf{Z})$  is given by:

$$\mathbf{B} := \left( \mathbf{Z}^\top \mathbf{Z} / T + \mathbf{I} \right)^{-1} \quad (24)$$

$$\nabla f(\mathbf{Z}) = -\mathbf{Z} \mathbf{B} \mathbf{X} \mathbf{X}^\top \mathbf{B} + \mathbf{Z} \mathbf{Z}^\top \mathbf{Z} / \rho^2 \quad (25)$$

645 Finally, the expression for  $\mathbf{Y}$  is (**Supplementary Information**, equation (S48)):

$$\mathbf{Y} = \mathbf{X} \left( \mathbf{I}_T + \frac{1}{T} \mathbf{Z}^\top \mathbf{Z} \right)^{-1} \quad (26)$$

### 646 Numerical simulation of the NNC offline

647 For the NNC, we do not have the analytical expressions of  $\mathbf{Y}$  and  $\mathbf{Z}$ . To minimize the objective  
 648 function, we perform alternating gradient descent/ascent steps on  $\mathbf{Y}$  and  $\mathbf{Z}$ , respectively. We start  
 649 from the expanded expression of the objective function (18) (with  $\gamma = 1$ ):

$$\mathcal{L} = \min_{\mathbf{Y} \geq 0} \max_{\mathbf{Z} \geq 0} \frac{1}{T^2} \text{Tr} \left[ -T \mathbf{X}^\top \mathbf{Y} + \frac{T}{2} \mathbf{Y}^\top \mathbf{Y} + \frac{1}{2} \mathbf{Y}^\top \mathbf{Y} \mathbf{Z}^\top \mathbf{Z} - \frac{1}{4\rho^2} \mathbf{Z}^\top \mathbf{Z} \mathbf{Z}^\top \mathbf{Z} \right] \quad (27)$$



---

**Algorithm 2** Finding the minimum in  $\mathbf{Y}$  and maximum in  $\mathbf{Z}$  of

$$f(\mathbf{Y}, \mathbf{Z}) = \text{Tr} \left[ -T\mathbf{X}^\top \mathbf{Y} + \frac{T}{2} \mathbf{Y}^\top \mathbf{Y} + \frac{1}{2} \mathbf{Y}^\top \mathbf{Y} \mathbf{Z}^\top \mathbf{Z} - \frac{1}{4\rho^2} \mathbf{Z}^\top \mathbf{Z} \mathbf{Z}^\top \mathbf{Z} \right]$$


---

- 1: **Objective:** find  $\mathbf{Y} \in \mathbb{R}_+^{D \times T}$  and  $\mathbf{Z} \in \mathbb{R}_+^{K \times T}$  that optimize  $\min_{\mathbf{Y}} \max_{\mathbf{Z}} f(\mathbf{Y}, \mathbf{Z})$ .
  - 2: **Inputs:**
  - 3:  $\mathbf{X} \in \mathbb{R}^{D \times T}$
  - 4:  $K > 0$ : the number of dimensions of  $\mathbf{Z}$
  - 5:  $\rho > 0$ : a constant encoding the strength of the inhibition by the LNs
  - 6:  $0 < \sigma < 1$ : acceptance parameter (usually 0.1)
  - 7:  $\alpha_0 > 0$ : initial gradient step coefficient (usually 1)
  - 8:  $0 < \beta < 1$ : reduction factor (usually 0.1)
  - 9:  $0 < \mu \ll 1$ : tolerance parameter (usually  $\approx 10^{-6}$ )
  - 10:  $n_{cycle} \approx 500$ : number of steps after which one decreases the value of  $\alpha_0$
  - 11: **Initialize:**
  - 12:  $\mathbf{Y}_{new} \in \mathbb{R}_+^{D \times N} \sim \text{abs}[\mathcal{N}(0, \text{s. d.}(\mathbf{X})/100)]$
  - 13:  $\mathbf{Z}_{new} \in \mathbb{R}_+^{K \times N} \sim \text{abs}[\mathcal{N}(0, \text{s. d.}(\mathbf{X})/100)]$
  - 14:  $i \leftarrow 1$
  - 15: **Iterate:**
  - 16: **repeat**
  - 17:      $\mathbf{Y} \leftarrow \mathbf{Y}_{new}$
  - 18:      $\mathbf{Z} \leftarrow \mathbf{Z}_{new}$
  - 19:      $\alpha = \alpha_0$
  - 20:     **repeat**
  - 21:          $\mathbf{Y}_{new} = [\mathbf{Y} - \alpha \nabla_{\mathbf{Y}} f(\mathbf{Y}, \mathbf{Z})]^+ \triangleright$  Find a potential new  $\mathbf{Y}$  through a gradient descent step
  - 22:          $\widehat{\Delta}f = \sigma \cdot \text{sum}[\nabla_{\mathbf{Y}} f(\mathbf{Y}, \mathbf{Z}) \odot (\mathbf{Y}_{new} - \mathbf{Y})] \triangleright$  Acceptable decrease in  $f$  (negative number)
  - 23:          $\Delta f = f(\mathbf{Y}_{new}, \mathbf{Z}) - f(\mathbf{Y}, \mathbf{Z}) \triangleright$  True decrease in  $f$  (negative number)
  - 24:          $\alpha \leftarrow \beta \alpha \triangleright$  Decrease the gradient descent step size for the next iteration, if it occurs
  - 25:     **until**  $\Delta f < \widehat{\Delta}f \triangleright$  Exit loop if the true decrease in  $f$  is larger than the acceptable one
  - 26:      $\alpha = \alpha_0$
  - 27:     **repeat**
  - 28:          $\mathbf{Z}_{new} = [\mathbf{Z} + \alpha \nabla_{\mathbf{Z}} f(\mathbf{Y}_{new}, \mathbf{Z})]^+ \triangleright$  find a potential new  $\mathbf{Z}$  through a gradient ascend step
  - 29:          $\widehat{\Delta}f = \sigma \cdot \text{sum}[\nabla_{\mathbf{Z}} f(\mathbf{Y}_{new}, \mathbf{Z}) \odot (\mathbf{Z}_{new} - \mathbf{Z})] \triangleright$  Acceptable increase in  $f$  (positive number)
  - 30:          $\Delta f = f(\mathbf{Y}_{new}, \mathbf{Z}_{new}) - f(\mathbf{Y}_{new}, \mathbf{Z}) \triangleright$  True increase in  $f$  (positive number)
  - 31:          $\alpha \leftarrow \beta \alpha \triangleright$  Decrease the ascent descent step size for the next iteration, if it occurs
  - 32:     **until**  $\Delta f > \widehat{\Delta}f \triangleright$  Exit loop if the true increase in  $f$  is larger than the acceptable one
  - 33:     **if**  $i \bmod n_{cycle} = 0$  **then**  $\triangleright$  Every  $n_{cycle}$ , decrease the initial step size  $\alpha_0$  by  $\beta$
  - 34:          $\alpha_0 \leftarrow \beta \alpha_0$
  - 35:     **end if**
  - 36:      $i \leftarrow i + 1$
  - 37: **until**  $|f(\mathbf{Y}, \mathbf{Z}) - f(\mathbf{Y}_{new}, \mathbf{Z})| / |f(\mathbf{Y}, \mathbf{Z})| < \mu$  and  $|f(\mathbf{Y}_{new}, \mathbf{Z}) - f(\mathbf{Y}_{new}, \mathbf{Z}_{new})| / |f(\mathbf{Y}_{new}, \mathbf{Z})| < \mu$
  - 38: **Output:**  $\mathbf{Y}_{new}, \mathbf{Z}_{new}$
-

650 In the case of the LC, the same algorithm holds, with all the rectifications  $[\cdot]^+$  removed from the  
651 algorithm and the “abs” removed from the initiation. If in either of the inner repeat loops, no  $\alpha$  is  
652 small enough to make a decrease/increase in  $f$  (i.e., satisfy the condition  $\Delta f < \widehat{\Delta f}$  or  $\Delta f > \widehat{\Delta f}$ ),  
653 the iterations stop and the current  $\mathbf{Y}$  and  $\mathbf{Z}$  are the output of the algorithm.

654 The gradients of  $f(\mathbf{Y}, \mathbf{Z})$  are:

$$\nabla_{\mathbf{Y}} f(\mathbf{Y}, \mathbf{Z}) = -T(\mathbf{X} - \mathbf{Y}) + \mathbf{Y}\mathbf{Z}^{\top}\mathbf{Z} \quad (28)$$

$$\nabla_{\mathbf{Z}} f(\mathbf{Y}, \mathbf{Z}) = \mathbf{Z}\mathbf{Y}^{\top}\mathbf{Y} - \mathbf{Z}\mathbf{Z}^{\top}\mathbf{Z}/\rho^2 \quad (29)$$

## 655 Numerical simulation of the circuits online

656 For **Fig. S11**, we simulated the circuit dynamics for a given  $\mathbf{W}$ ,  $\mathbf{M}$ , and  $\mathbf{X}$ . For that purpose, to  
657 find  $\bar{\mathbf{y}}$  and  $\bar{\mathbf{z}}$ , we performed gradient descent steps based on the discretized equations (19) for the  
658 LC or equation (20) for the NNC.

## 659 Data and code availability

660 All data in this study is published in Berck et al., 2016; Si et al., 2019 and is accessible online:  
661 <https://github.com/samuellab/Larval-ORN>, <https://doi.org/10.7554/eLife.14859.019>,  
662 <https://doi.org/10.7554/eLife.14859.020>.

663 All the code used in this study is available here:  
664 [https://github.com/chapochn/ORN-LN\\_circuit](https://github.com/chapochn/ORN-LN_circuit)

## References

- 665  
666 Aimon, S., Katsuki, T., Jia, T., Grosenick, L., Broxton, M., Deisseroth, K., Sejnowski, T. J., &  
667 Greenspan, R. J. (2019). Fast near-whole-brain imaging in adult drosophila during re-  
668 sponses to stimuli and behavior. *PLOS Biology*, *17*(2), e2006732.
- 669 Arenas, A., Giurfa, M., Sandoz, J. C., Hourcade, B., Devaud, J. M., & Farina, W. M. (2012). Early  
670 olfactory experience induces structural changes in the primary olfactory center of an insect  
671 brain. *European Journal of Neuroscience*, *35*(5), 682–690.
- 672 Asahina, K., Louis, M., Piccinotti, S., & Vosshall, L. B. (2009). A circuit supporting concentration-  
673 invariant odor perception in drosophila. *Journal of Biology*, *8*(1), 9.
- 674 Atick, J. J., & Redlich, A. N. (1990). Towards a theory of early visual processing. *Neural Computa-*  
675 *tion*, *2*(3), 308–320.
- 676 Atick, J. J., & Redlich, A. N. (1992). What does the retina know about natural scenes? *Neural*  
677 *Computation*, *4*(2), 196–210.
- 678 Atick, J. J., & Redlich, A. N. (1993). Convergent algorithm for sensory receptive field development.  
679 *Neural Computation*, *5*(1), 45–60.
- 680 Bahroun, Y., Chklovskii, D., & Sengupta, A. (2019). A similarity-preserving network trained on  
681 transformed images recapitulates salient features of the fly motion detection circuit. *Ad-*  
682 *vances in Neural Information Processing Systems*, *32*.
- 683 Barlow, H. B. (1961). Possible principles underlying the transformations of sensory messages. In  
684 W. Rosenblith (Ed.), *Sensory communication* (pp. 217–34). The MIT Press.
- 685 Bell, A. J., & Sejnowski, T. J. (1997). The 'independent components' of natural scenes are edge  
686 filters. *Vision Research*, *37*(23), 3327–3338.
- 687 Benjamini, Y., & Hochberg, Y. (1995). Controlling the false discovery rate: A practical and powerful  
688 approach to multiple testing. *Journal of the Royal Statistical Society. Series B (Method-*  
689 *ological)*, *57*(1), 289–300.
- 690 Berck, M. E., Khandelwal, A., Claus, L., Hernandez-Nunez, L., Si, G., Tabone, C. J., Li, F., Truman,  
691 J. W., Fetter, R. D., Louis, M., Samuel, A. D., & Cardona, A. (2016). The wiring diagram  
692 of a glomerular olfactory system. *eLife*, *5*, e14859.
- 693 Carandini, M., & Heeger, D. J. (2012). Normalization as a canonical neural computation. *Nature*  
694 *Reviews Neuroscience*, *13*(1), 1–12.
- 695 Chou, Y.-H., Spletter, M. L., Yaksi, E., Leong, J. C. S., Wilson, R. I., & Luo, L. (2010). Diversity  
696 and wiring variability of olfactory local interneurons in the *Drosophila* antennal lobe. *Nature*  
697 *Neuroscience*, *13*(4), 439–449.
- 698 Das, S., Sadanandappa, M. K., Dervan, A., Larkin, A., Lee, J. A., Sudhakaran, I. P., Priya, R.,  
699 Heidari, R., Holohan, E. E., Pimentel, A., Gandhi, A., Ito, K., Sanyal, S., Wang, J. W.,  
700 Rodrigues, V., & Ramaswami, M. (2011). Plasticity of local GABAergic interneurons drives

- 701 olfactory habituation. *Proceedings of the National Academy of Sciences*, 108(36), E646–  
702 E654.
- 703 Devaud, J.-M., Acebes, A., & Ferrús, A. (2001). Odor exposure causes central adaptation and mor-  
704 phological changes in selected olfactory glomeruli in drosophila. *Journal of Neuroscience*,  
705 21(16), 6274–6282.
- 706 Eichler, K., Li, F., Litwin-Kumar, A., Park, Y., Andrade, I., Schneider-Mizell, C. M., Saumweber,  
707 T., Huser, A., Eschbach, C., Gerber, B., Fetter, R. D., Truman, J. W., Priebe, C. E.,  
708 Abbott, L. F., Thum, A. S., Zlatic, M., & Cardona, A. (2017). The complete connectome  
709 of a learning and memory centre in an insect brain. *Nature*, 548(7666), 175–182.
- 710 Friedrich, R. W. (2013). Neuronal computations in the olfactory system of zebrafish. *Annual Review*  
711 *of Neuroscience*, 36(1), 383–402.
- 712 Friedrich, R. W., & Laurent, G. (2001). Dynamic optimization of odor representations by slow  
713 temporal patterning of mitral cell activity. *Science*, 291(5505), 889–894.
- 714 Friedrich, R. W., & Wiechert, M. T. (2014). Neuronal circuits and computations: Pattern decorre-  
715 lation in the olfactory bulb. *FEBS Letters*, 588(15), 2504–2513.
- 716 Giridhar, S., Doiron, B., & Urban, N. N. (2011). Timescale-dependent shaping of correlation by  
717 olfactory bulb lateral inhibition. *Proceedings of the National Academy of Sciences*, 108(14),  
718 5843–5848.
- 719 Golkar, S., Lipshutz, D., Bahroun, Y., Sengupta, A., & Chklovskii, D. (2020). A simple norma-  
720 tive network approximates local non-hebbian learning in the cortex. *Advances in Neural*  
721 *Information Processing Systems*, 33, 7283–7295.
- 722 Gschwend, O., Abraham, N. M., Lagier, S., Begnaud, F., Rodriguez, I., & Carleton, A. (2015).  
723 Neuronal pattern separation in the olfactory bulb improves odor discrimination learning.  
724 *Nature Neuroscience*, 18(10), 1474–1482.
- 725 Hattori, R., Kuchibhotla, K. V., Froemke, R. C., & Komiyama, T. (2017). Functions and dysfunc-  
726 tions of neocortical inhibitory neuron subtypes. *Nature Neuroscience*, 20(9), 1199–1208.
- 727 Heeger, D. J. (1992). Normalization of cell responses in cat striate cortex. *Visual Neuroscience*,  
728 9(2), 181–197.
- 729 Holderith, N., Lorincz, A., Katona, G., Rózsa, B., Kulik, A., Watanabe, M., & Nusser, Z. (2012).  
730 Release probability of hippocampal glutamatergic terminals scales with the size of the active  
731 zone. *Nature Neuroscience*, 15(7), 988–997.
- 732 Hong, E. J., & Wilson, R. I. (2015). Simultaneous encoding of odors by channels with diverse  
733 sensitivity to inhibition. *Neuron*, 85(3), 573–589.
- 734 Kessy, A., Lewin, A., & Strimmer, K. (2018). Optimal whitening and decorrelation. *The American*  
735 *Statistician*, 72(4), 309–314.
- 736 Kim, A. J., Lazar, A. A., & Slutskiy, Y. B. (2015). Projection neurons in drosophila antennal lobes  
737 signal the acceleration of odor concentrations. *eLife*, 4, e06651.

- 738 King, P. D., Zylberberg, J., & DeWeese, M. R. (2013). Inhibitory interneurons decorrelate excitatory  
739 cells to drive sparse code formation in a spiking model of v1. *Journal of Neuroscience*,  
740 *33*(13), 5475–5485.
- 741 Koulakov, A. A., & Rinberg, D. (2011). Sparse incomplete representations: A potential role of  
742 olfactory granule cells. *Neuron*, *72*(1), 124–136.
- 743 Kuang, D., Park, H., & Ding, C. (2012). Symmetric nonnegative matrix factorization for graph  
744 clustering. *International Conference on Data Mining*, 494–505.
- 745 Laurent, G. (2002). Olfactory network dynamics and the coding of multidimensional signals. *Nature*  
746 *Reviews Neuroscience*, *3*(11), 884–895.
- 747 Linsker, R. (1988). Self-organization in a perceptual network. *Computer*, *21*(3), 105–117.
- 748 Linster, C., Sachse, S., & Galizia, C. G. (2005). Computational modeling suggests that response  
749 properties rather than spatial position determine connectivity between olfactory glomeruli.  
750 *Journal of Neurophysiology*, *93*(6), 3410–3417.
- 751 Masland, R. H. (2012). The neuronal organization of the retina. *Neuron*, *76*(2), 266–280.
- 752 Nagel, K. I., Hong, E. J., & Wilson, R. I. (2014). Synaptic and circuit mechanisms promoting broad-  
753 band transmission of olfactory stimulus dynamics. *Nature Neuroscience*, *18*(1), nn.3895.
- 754 Nagel, K. I., & Wilson, R. I. (2016). Mechanisms underlying population response dynamics in  
755 inhibitory interneurons of the drosophila antennal lobe. *Journal of Neuroscience*, *36*(15),  
756 4325–4338.
- 757 Olsen, S. R., Bhandawat, V., & Wilson, R. I. (2010). Divisive normalization in olfactory population  
758 codes. *Neuron*, *66*(2), 287–299.
- 759 Olsen, S. R., & Wilson, R. I. (2008). Lateral presynaptic inhibition mediates gain control in an  
760 olfactory circuit. *Nature*, *452*(7190), 956–960.
- 761 Olshausen, B. A., & Field, D. J. (1997). Sparse coding with an overcomplete basis set: A strategy  
762 employed by v1? *Vision Research*, *37*(23), 3311–3325.
- 763 Pehlevan, C., & Chklovskii, D. B. (2015). A hebbian/anti-hebbian network derived from online non-  
764 negative matrix factorization can cluster and discover sparse features. *Conference Record -*  
765 *Asilomar Conference on Signals, Systems and Computers, 2015-April*, 769–775.
- 766 Pehlevan, C., & Chklovskii, D. B. (2016). Optimization theory of hebbian/anti-hebbian networks for  
767 PCA and whitening. *2015 53rd Annual Allerton Conference on Communication, Control,*  
768 *and Computing, Allerton 2015*, 1458–1465.
- 769 Pehlevan, C., Sengupta, A., & Chklovskii, D. B. (2018). Why do similarity matching objectives  
770 lead to hebbian/anti-hebbian networks? *Neural computation*, *30*(1), 84–124.
- 771 Plumbley, M. D. (1993). A hebbian/anti-hebbian network which optimizes information capacity by  
772 orthonormalizing the principal subspace. *in Proc. IEE Conf. on Artificial Neural Networks*,  
773 86–90.
- 774 Sachse, S., Rueckert, E., Keller, A., Okada, R., Tanaka, N. K., Ito, K., & Vosshall, L. B. (2007).  
775 Activity-dependent plasticity in an olfactory circuit. *Neuron*, *56*(5), 838–850.

- 776 Sato, T. K., Haider, B., Häusser, M., & Carandini, M. (2016). An excitatory basis for divisive  
777 normalization in visual cortex. *Nature Neuroscience*, *19*(4), 568–570.
- 778 Scheffer, L. K., Xu, C. S., Januszewski, M., Lu, Z., Takemura, S.-y., Hayworth, K. J., Huang, G. B.,  
779 Shinomiya, K., Maitlin-Shepard, J., Berg, S., Clements, J., Hubbard, P. M., Katz, W. T.,  
780 Umayam, L., Zhao, T., Ackerman, D., Blakely, T., Bogovic, J., Dolafi, T., . . . Plaza, S. M.  
781 (2020). A connectome and analysis of the adult drosophila central brain (E. Marder, M. B.  
782 Eisen, J. Pipkin, & C. Q. Doe, Eds.). *eLife*, *9*, e57443.
- 783 Si, G., Kanwal, J. K., Hu, Y., Tabone, C. J., Baron, J., Berck, M., Vignoud, G., & Samuel, A. D. T.  
784 (2019). Structured odorant response patterns across a complete olfactory receptor neuron  
785 population. *Neuron*, *101*(5), 950–962.e7.
- 786 Simoncelli, E. P., & Olshausen, B. A. (2001). Natural image statistics and neural representation.  
787 *Annual Review of Neuroscience*, *24*(1), 1193–1216.
- 788 Sudhakaran, I. P., Holohan, E. E., Osman, S., Rodrigues, V., VijayRaghavan, K., & Ramaswami,  
789 M. (2012). Plasticity of recurrent inhibition in the drosophila antennal lobe. *Journal of*  
790 *Neuroscience*, *32*(21), 7225–7231.
- 791 Takemura, S.-y., Bharioke, A., Lu, Z., Nern, A., Vitaladevuni, S. N., Rivlin, P. K., Katz, W. T.,  
792 Olbris, D. J., Plaza, S. M., Winston, P., Zhao, T., Horne, J. A., Fetter, R. D., Takemura, S.,  
793 Blazek, K., Chang, L.-A., Ogundeyi, O., Saunders, M. a., Shapiro, V., . . . Chklovskii, D. B.  
794 (2013). A visual motion detection circuit suggested by drosophila connectomics. *Nature*,  
795 *500*(7461), 175–181.
- 796 Tobin, W. F., Wilson, R. I., & Lee, W.-C. A. (2017). Wiring variations that enable and constrain  
797 neural computation in a sensory microcircuit (L. Luo, Ed.). *eLife*, *6*, e24838.
- 798 Wanner, A. A., & Friedrich, R. W. (2020). Whitening of odor representations by the wiring diagram  
799 of the olfactory bulb. *Nature Neuroscience*, 1–10.
- 800 Westrick, Z. M., Heeger, D. J., & Landy, M. S. (2016). Pattern adaptation and normalization  
801 reweighting. *Journal of Neuroscience*, *36*(38), 9805–9816.
- 802 Wick, S. D., Wiechert, M. T., Friedrich, R. W., & Rieke, H. (2010). Pattern orthogonalization  
803 via channel decorrelation by adaptive networks. *Journal of Computational Neuroscience*,  
804 *28*(1), 29–45.
- 805 Wilson, R. I. (2013). Early olfactory processing in drosophila: Mechanisms and principles. *Annual*  
806 *Review of Neuroscience*, *36*(1), 217–241.
- 807 Zhu, M., & Rozell, C. J. (2015). Modeling inhibitory interneurons in efficient sensory coding models.  
808 *PLOS Computational Biology*, *11*(7), e1004353.
- 809 Zhu, P., Frank, T., & Friedrich, R. W. (2013). Equalization of odor representations by a network  
810 of electrically coupled inhibitory interneurons. *Nature Neuroscience*, *16*(11), 1678–1686.

## 811 **Acknowledgments**

812 We thank Aravinthan D.T. Samuel, Jacob Baron, Guangwei Si, Thomas Frank, Victor Minden,  
813 Anirvan Sengupta, Eftychios A. Pnevmatikakis, Shiva GhaaniFarashahi, and the Neuroscience  
814 Group at the Flatiron Institute for discussions and/or comments on the manuscript.

## 815 **Author contributions**

816 All authors designed the study. C.P. and D.B.C. formulated the objective function. N.M.C. and  
817 C.P. performed theoretical derivations. N.M.C. wrote the computer code, analyzed the data, per-  
818 formed numerical simulations, and prepared the original draft. All authors reviewed and edited the  
819 manuscript.

## 820 **Competing interests**

821 The authors declare no competing interests.



## 822 **Supplementary Figures**



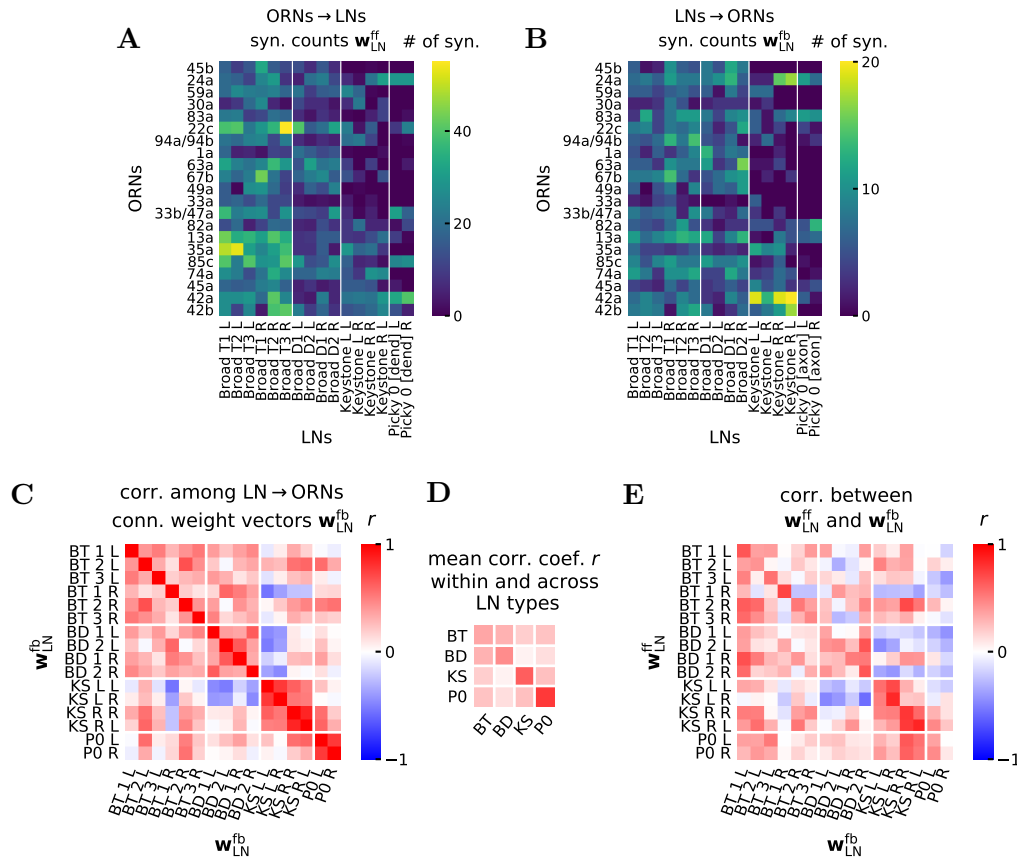

**Fig. S2. ORN-LN connectivity, comparison feedforward with feedback**

**A** ORNs → LNs feedforward connections weights  $w_{LN}^{ff}$  on both left and right sides of the antennal lobe with the chosen LNs, ordered by LN class. The vectors  $w_{LN}^{ff}$  correspond to the columns of the depicted matrix.

**B** LN → ORNs feedback connections weights  $w_{LN}^{fb}$  on both left and right sides of the antennal lobe with the chosen LNs, ordered by LN class. The vectors  $w_{LN}^{fb}$  correspond to the columns of the depicted matrix.

**C** Correlation coefficients between feedback LN → ORNs connection weight vectors  $w_{LN}^{fb}$ .

**D** Average rectified correlation coefficient  $\langle r_+ \rangle$  ( $r_+ := \max[0, r]$ ) between LN types calculated by averaging the rectified values from (C) in each rectangle with white border, excluding the diagonal entries of the full matrix.

The average correlation coefficient within a class is larger than the correlation coefficient across classes.

**E** Correlation coefficients between feedforward ORNs → LN  $w_{LN}^{ff}$  and feedback LN → ORNs  $w_{LN}^{fb}$  connection weight vectors. The Picky 0 LN is the only LN that has a separation between axonal and dendritic terminals. For the feedforward ORNs → LN connections, we only include in the connection weight vector the synapses onto the Picky 0 dendrite, and for the LN → ORNs connection, we only count the synapses from the Picky 0 axon.

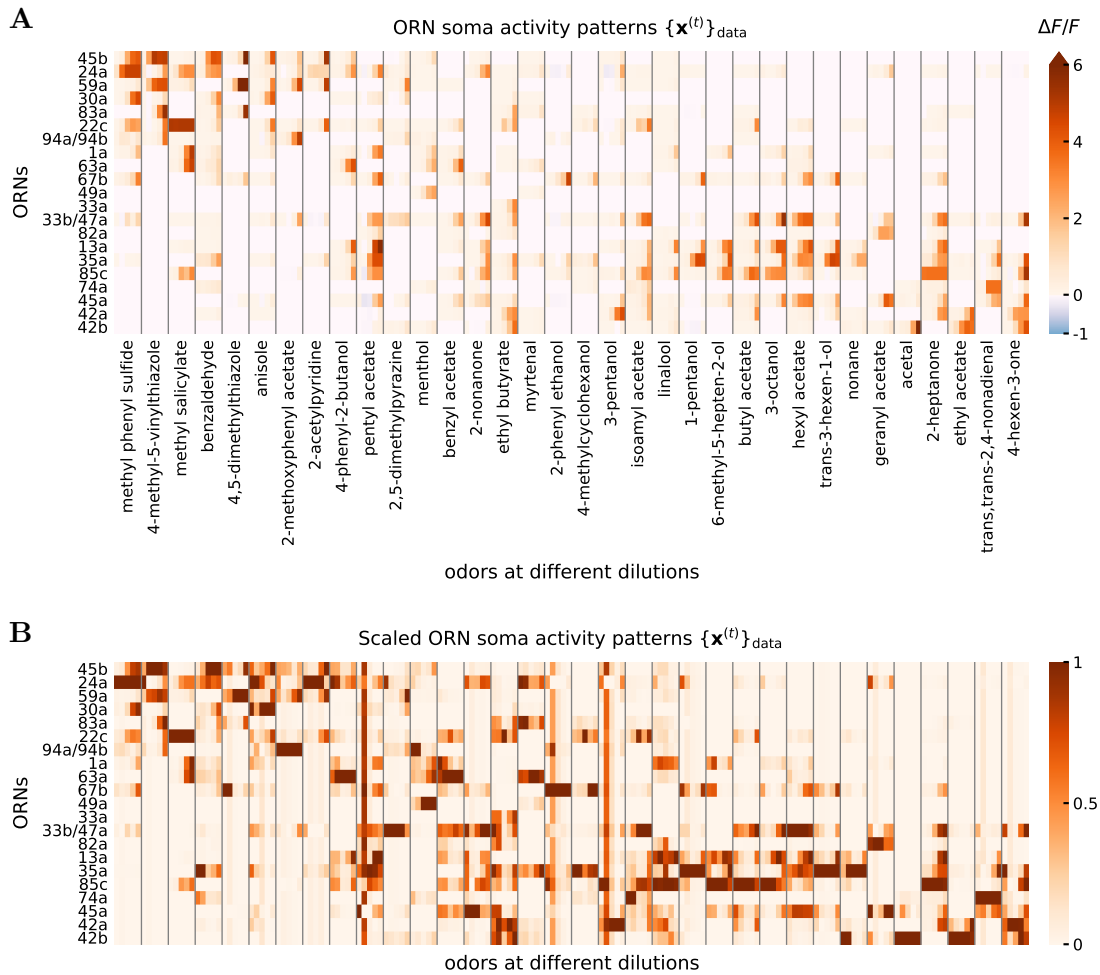

**Fig. S3. ORN soma activity from Si et al., 2019**

**A** ORN soma activity patterns  $\{\mathbf{x}^{(t)}\}_{\text{data}}$  in response to 34 odors at 5 dilutions acquired through  $\text{Ca}^{2+}$  imaging. Different odors are separated by vertical gray lines. For each odor, there are 5 columns corresponding to 5 dilutions:  $10^{-8}$ , ...,  $10^{-4}$ . The odors and ORNs are ordered by the value of the second singular vectors of the left and right SVD matrices of this activity data, after centering and normalizing. This data is obtained by averaging the maximum responses of several trials to the same odor and dilution (as in Si et al., 2019).

**B** Same as **(A)**, with each  $\mathbf{x}^{(t)}$  scaled between 0 and 1 to better portray the patterns.

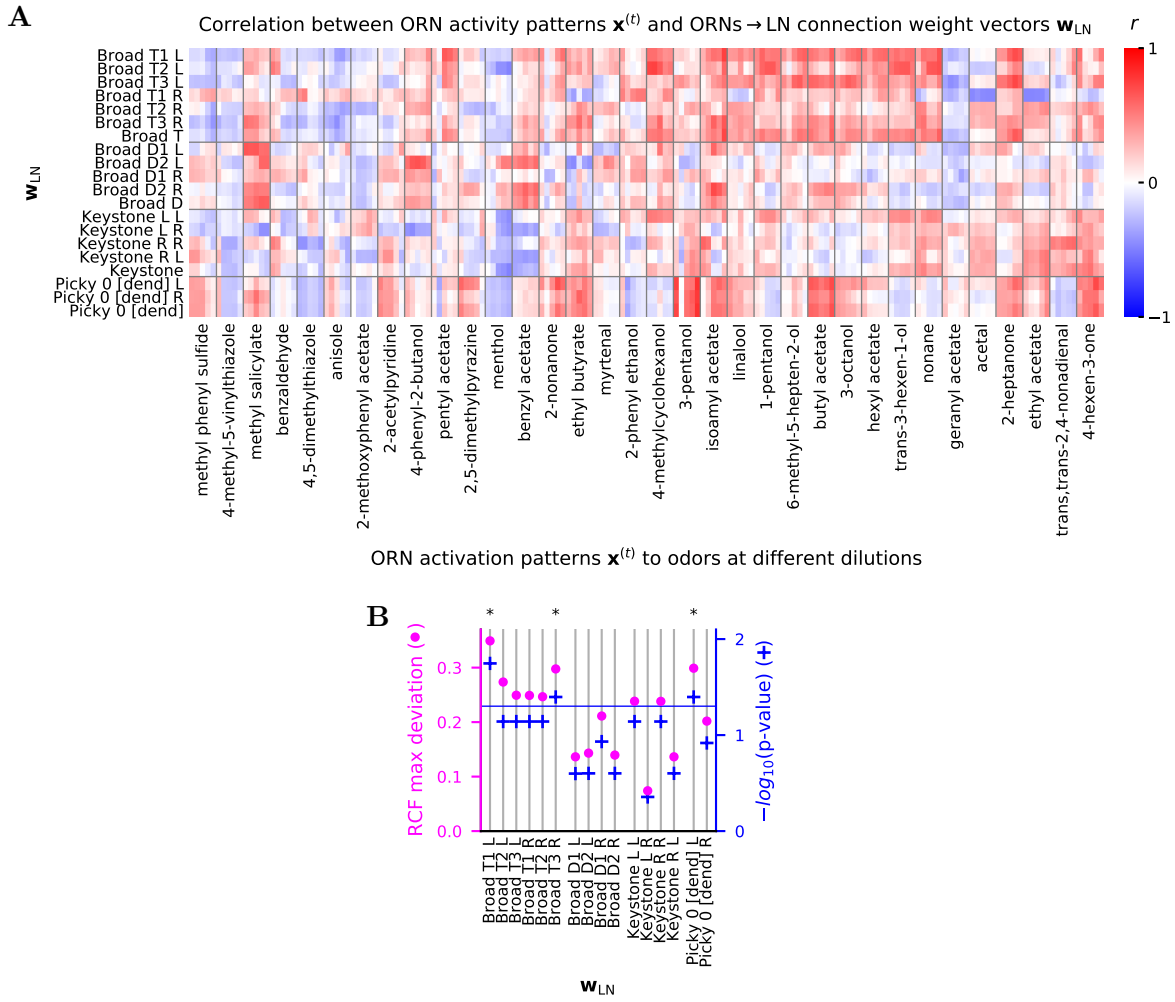

**Fig. S4. Alignment of activity patterns  $\mathbf{x}^{(t)}$  in ORNs and ORNs  $\rightarrow$  LN connectivity weight vectors  $\mathbf{w}_{LN}$**   
**A** Same as **Fig. 2E**, for all the  $\mathbf{w}_{LN}$  and with all the odors labeled. Same odor order.  
**B** Same as **Fig. 2I**, for all  $\mathbf{w}_{LN}$ .

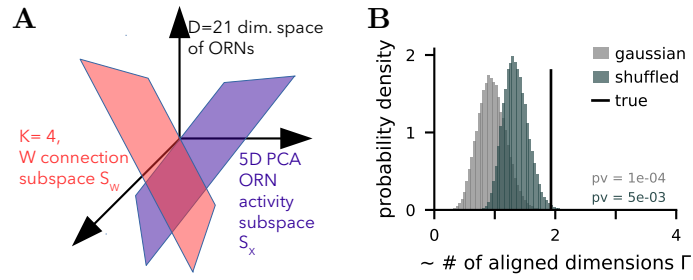

**Fig. S5. Activity and connectivity subspace alignment**

**A** Scheme representing the comparison of the 4-dimensional connectivity ( $S_W$ ) and 5-dimensional activity ( $S_X$ ) subspaces in 21 dimensions ( $D = 21$ , dimensionality of the ORN space).

**B** Number of aligned dimensions  $\Gamma$  between the 2 subspaces of (A) in the data (true,  $\Gamma = 1.9$ ), from randomly shuffling the connectivity vector entries (shuffled, mean  $\Gamma = 1.3$ ) and from random normal vectors (Gaussian, mean  $\Gamma = 1$ ). pv: one-sided p-value.

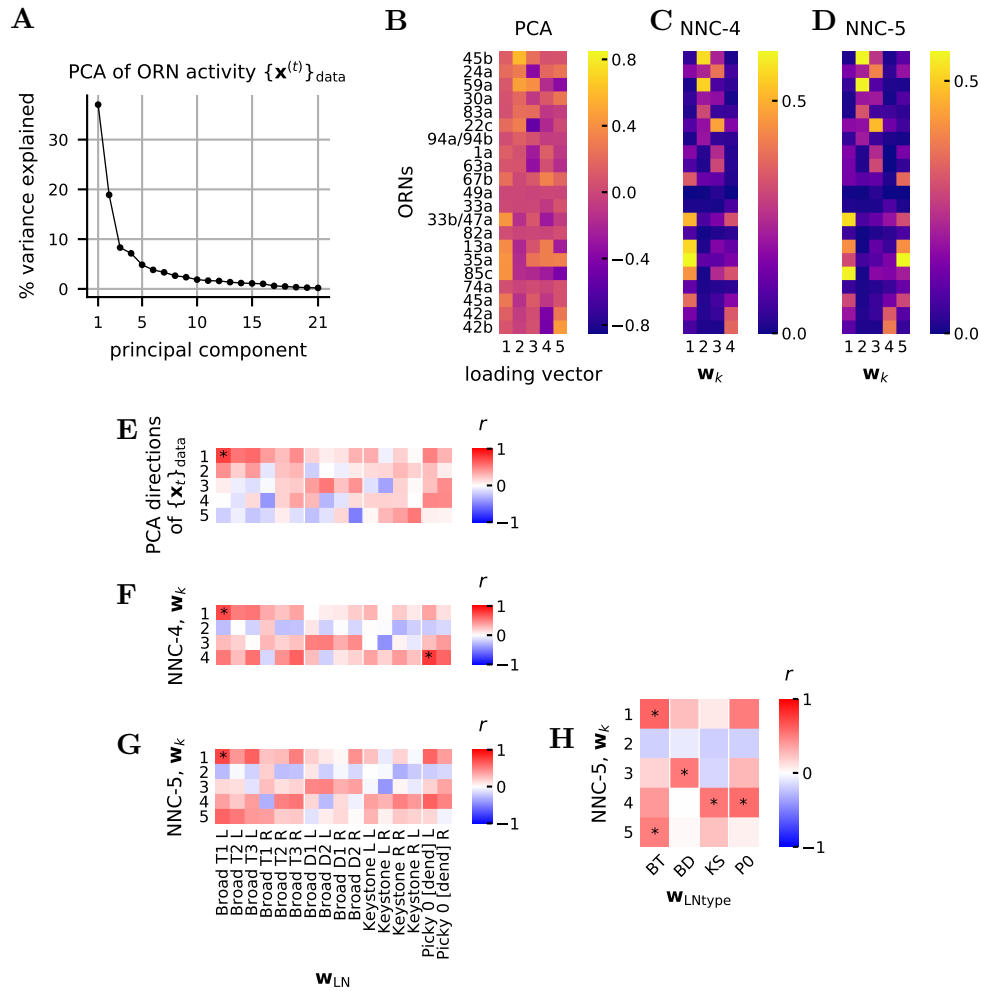

**Fig. S6. Activity and connectivity**

**A** Percentage of the variance of the ORN activity patterns  $\{\mathbf{x}^{(t)}\}_{\text{data}}$  explained by the uncentered PCA. The top 4 and 5 PCA directions explain 71% and 76% of the variance, respectively.

**B** First 5 PCA loading vectors of  $\{\mathbf{x}^{(t)}\}_{\text{data}}$ .

**C-D**  $\mathbf{w}_k$  from NNC with  $K = 4, 5$  and  $\rho = 1$ , ordered to resemble the PCA ordering.

**E** Same as **Fig. 3C** with all  $\mathbf{w}_{LN}$ .

**F** Same as **(E)**, with  $\mathbf{w}_k$  from NNC-4 instead of PCA loading vectors.

**G** Same as **(F)**, for NNC-5. The small number of significant points in **(E-G)** results from the higher number of hypothesis tests, which decreases the adjusted p-values in the FDR multi-hypothesis testing framework.

**H** Same as **Fig. 4A**, for NNC-5.



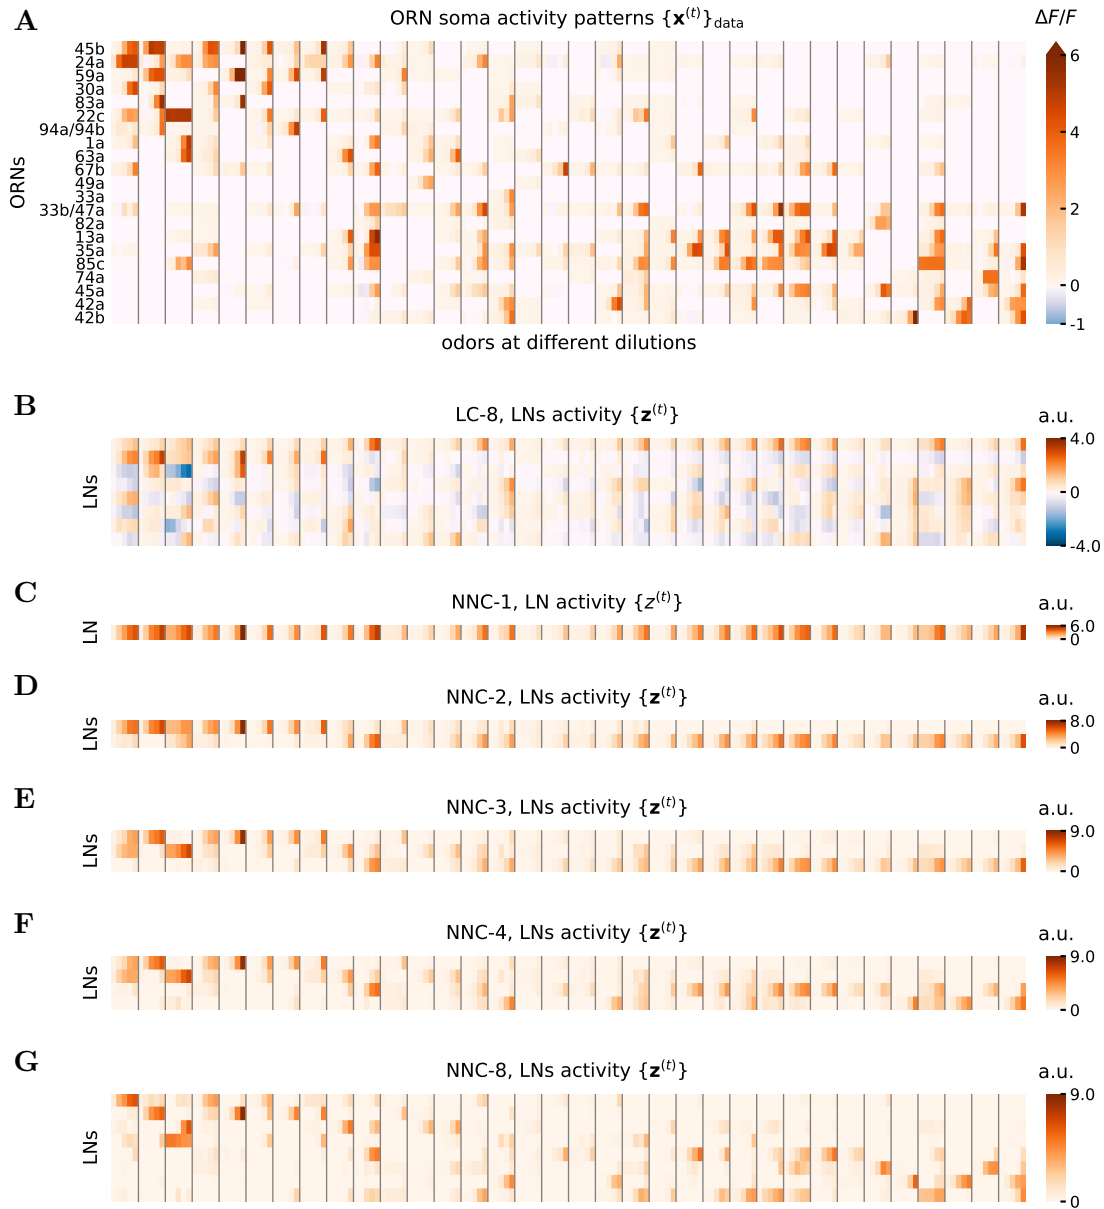

**Fig. S7. Activity of LNs  $\{z^{(t)}\}$  in the NNC and LC**

**A** ORN soma activity patterns  $\{x^{(t)}\}_{\text{data}}$  as in Fig. S3A.

**B** Activity in the LNs  $\{z^{(t)}\}$  for the LC-8. Stimuli are aligned to the panel above. As mentioned in the text,  $\{z^{(t)}\}$  is undetermined up to an orthogonal matrix  $U_Z$ . Here we set  $U_Z = I_K$ , i.e., identity matrix. For LC- $K$ , the response in LNs correspond to the first  $K$  row of this matrix, multiplied by any  $K \times K$  orthogonal matrix on the left. Thus, the matrix depicted in this plot shows the potential activity in LNs for any LC- $K$  with  $K \leq 8$ .

**C**  $\{z_t\}$  for the NNC-1. The activity of the LN approximately follows the total activity.

**D**  $\{z^{(t)}\}$  for the NNC-2. One can see that the 2 LNs roughly clusters the sets of odors into those activating the top ORNs and those activating the lower ORNs.

**E-G**  $\{z^{(t)}\}$  for the NNC with  $K = 3, 4, 8$ . One observes a more sophisticated clustering of the data. As more LNs are added, LN activity increases in sparsity. The activity in the LNs for the NNC is more sparse than for the LC.

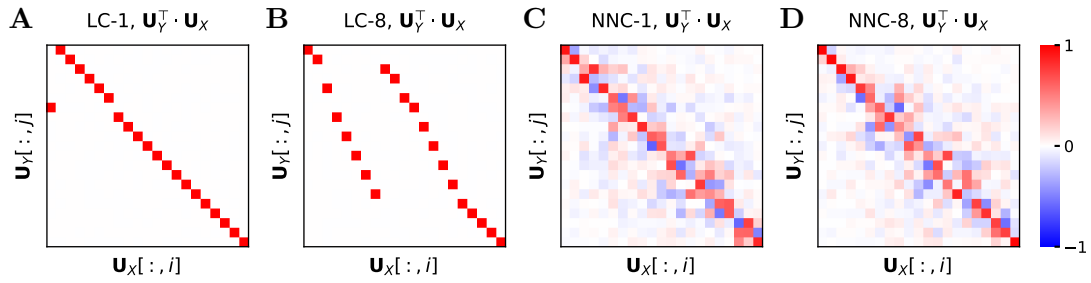

**Fig. S8. Input vs output principal directions in LC and NNC**

**A-D** Scalar product between principal directions of uncentered  $\{\mathbf{x}^{(t)}\}_{\text{data}}$  and  $\{\mathbf{y}^{(t)}\}$  for the LC and NNC for  $K = 1, 8$ . For the LC the identity of the principal directions is conserved, only their order change. For the NNC, the principal directions are slightly mixed, but conserve the approximate ordering.

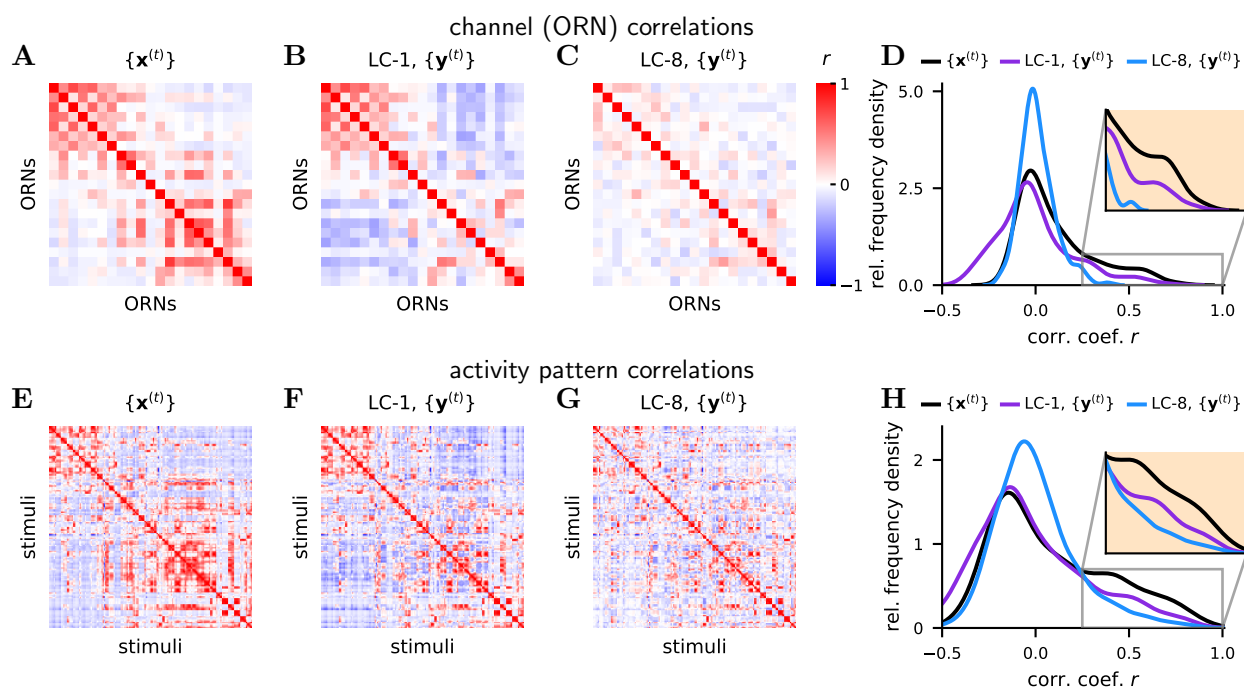

**Fig. S9. Decorrelation in the LC**

**A-H** Same as **Fig. 7J-O** for the LC.

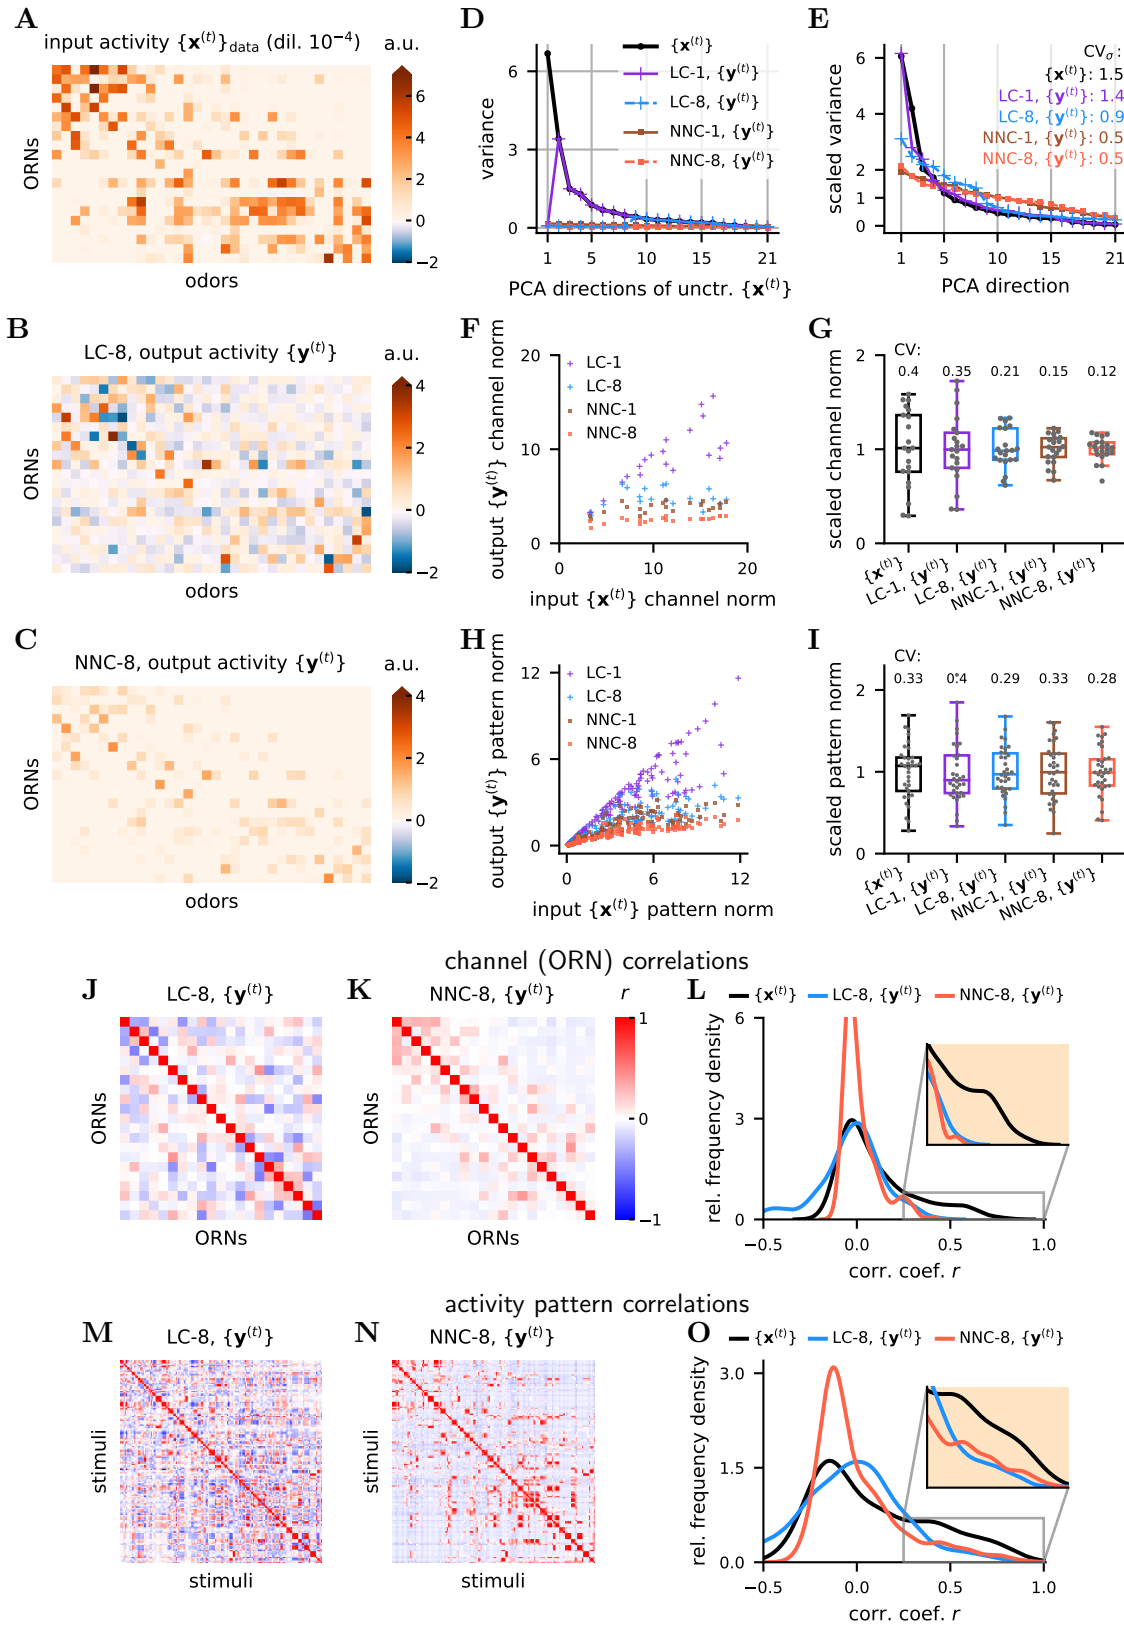

**Fig. S10. Input transformation by LC and NNC with  $\rho = 10$**

Same as **Fig. 7** for  $\rho = 10$ . Note the even stronger dampening, flattening, and decorrelation.

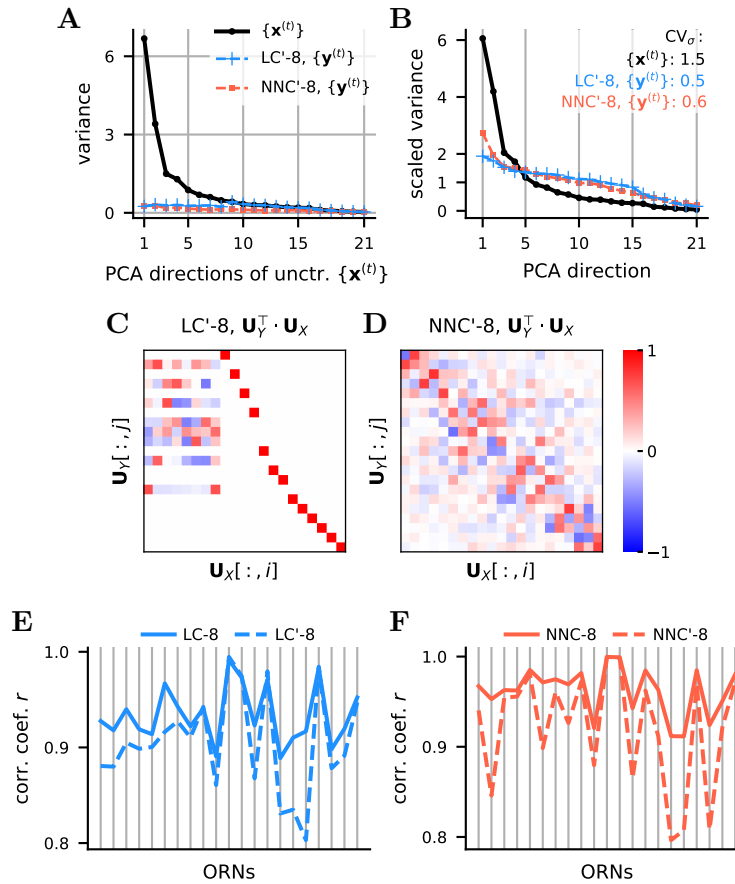

**Fig. S11. Effect of removing off-diagonal entries in  $\mathbf{M}$  for LC and NNC**

**A-B** Same as **Fig. 7D,E** for the trained LC and NNC on  $\{\mathbf{x}^{(t)}\}_{\text{data}}$ , where the off-diagonal values of  $\mathbf{M}$  are set to 0 (LC' and NNC'). Note that the values in LC' in **(A)** do not monotonically decrease as in LC.

**C-D** Same as **Fig. S8** for LC'-8 and NNC'-8. Note the increased mixture between the principal directions of  $\{\mathbf{x}^{(t)}\}_{\text{data}}$  and  $\{\mathbf{y}^{(t)}\}$ .

**E** Correlation between the input  $\{\mathbf{x}^{(t)}\}_{\text{data}}$  and output  $\{\mathbf{y}^{(t)}\}$  for each channel (i.e., ORN) for LC-8 and LC'-8. Note that in the LC-8, the output of each channel is more strongly correlated to its own input for the LC-8 than for the LC'-8.

**F** Same as **(E)** for NNC-8 and NNC'-8.

## 823 Supplementary Information

824 In this supplement, we prove statements made in the results and methods sections:

825 Section 1: we describe the objective function from equation (18), show the equivalence of scaling  
826  $\mathbf{X}$  and  $\rho$  (section 1.1) and show the resemblance of this circuit's objective function with a whitening  
827 objective function (section 1.2).

828 Section 2: we show that the objective function (18), when optimized online with or without  
829 non-negativity constraints, lead to the circuit dynamics (19) or (20), respectively, and to Hebbian  
830 learning rules (21). We then show the steady state solution to which the circuit dynamics equations  
831 (19) converge and show that the steady state is stable (section 2.2).

832 Section 3: we show that a general system of differential equations describing the circuit contains  
833 two effective parameters and can be reduced to the form found in the main text in equation (19).

834 Section 4: we analyze computation in LC and prove equations (4), (5), (6a), and (6b) in the  
835 main text from the main text. These results are proven in two ways (sections 4.1 and 4.2). Section  
836 4.3 discusses limiting cases of the computation for small and large values of  $\rho$ , and show the relation  
837 of NNC to SNMF (symmetric non-negative matrix factorization).

838 Section 5: we prove the relationship between  $\mathbf{W}$  and  $\mathbf{M}$ , equation (2) in the main text.

839 Section 6: we prove the relationship between  $\mathbf{W}$  and  $\mathbf{X}$ , equation (1) in the main text.

840 Section 7: we prove that the CV of singular values in  $\mathbf{Y}$  is smaller than in  $\mathbf{X}$  for the LC when  
841  $K = D$ .

### 842 1 Objective function

843 We postulate the following minimax objective function:

$$\mathcal{L} = \min_{\mathbf{Y}} \max_{\mathbf{Z}} \frac{1}{T^2} \left( \frac{T}{2} \|\mathbf{X} - \mathbf{Y}\|_F^2 - \frac{\rho^2}{4u^2} \left\| \mathbf{Y}^\top \mathbf{Y} - \frac{\gamma^2}{\rho^2} \mathbf{Z}^\top \mathbf{Z} \right\|_F^2 + \frac{\rho^2}{4u^2} \|\mathbf{Y}^\top \mathbf{Y}\|_F^2 \right) \quad (\text{S1})$$

844 Which can be expanded thus:

$$\mathcal{L} = \min_{\mathbf{Y}} \max_{\mathbf{Z}} \frac{1}{T^2} \text{Tr} \left[ -T \mathbf{X}^\top \mathbf{Y} + \frac{T}{2} \mathbf{Y}^\top \mathbf{Y} + \frac{\gamma^2}{2u^2} \mathbf{Y}^\top \mathbf{Y} \mathbf{Z}^\top \mathbf{Z} - \frac{\gamma^4}{4u^2 \rho^2} \mathbf{Z}^\top \mathbf{Z} \mathbf{Z}^\top \mathbf{Z} \right] \quad (\text{S2})$$

845 Where  $\mathbf{X}, \mathbf{Y} \in \mathbb{R}^{D \times T}$ ,  $\mathbf{Z} \in \mathbb{R}^{K \times T}$  with  $D$  the number of ORNs (21 for this olfactory circuit),  $K$   
846 the number of LNs,  $T$  the number of data (sample) points,  $\rho$  a positive unitless constant,  $u$  a unit  
847 with the physical dimension as  $\mathbf{X}$ ,  $\mathbf{Y}$ , and  $\mathbf{Z}$  (e.g., spikes  $\cdot s^{-1}$ ) (dropped for simplicity in the main  
848 text).  $\mathbf{X}$ ,  $\mathbf{Y}$  and  $\mathbf{Z}$  represent the activity of ORN somas, ORN axons, and LNs, respectively. We  
849 can interpret  $\mathbf{X}$  as all the discretized activity of ORNs up to a certain point in their lifetime.

850 Optimizing objective function (S2) leads to the linear circuit (LC) model. Adding the non-  
851 negativity constraints on  $\mathbf{Y}$  and  $\mathbf{Z}$  leads to the non-negative circuit (NNC) model.

## 852 1.1 Equivalence of scaling $\mathbf{X}$ and $\rho$

853 Here, we show that scaling  $\mathbf{X}$  is equivalent to scaling  $\rho$  in terms of circuit computation. It is easy  
854 to see that the transformation  $\mathbf{X} \rightarrow a\mathbf{X}$ ,  $\mathbf{Y} \rightarrow a\mathbf{Y}$  and  $\rho \rightarrow \rho/a$  (for  $a \neq 0$ ) leaves the objective  
855 function unaffected, i.e., this transformation is a symmetry of the optimization. Indeed:

$$\mathcal{L} = \min_{\mathbf{Y}} \max_{\mathbf{Z}} \frac{1}{T^2} \text{Tr} \left[ -T\mathbf{X}^\top \mathbf{Y} + \frac{T}{2} \mathbf{Y}^\top \mathbf{Y} + \frac{\gamma^2}{2u^2} \mathbf{Y}^\top \mathbf{Y} \mathbf{Z}^\top \mathbf{Z} - \frac{\gamma^4}{4u^2 \rho^2} \mathbf{Z}^\top \mathbf{Z} \mathbf{Z}^\top \mathbf{Z} \right] \quad (\text{S3})$$

$$= \min_{\mathbf{Y}} \max_{\mathbf{Z}} \frac{1}{T^2} \text{Tr} \left[ -Ta^2 \mathbf{X}^\top \mathbf{Y} + \frac{T}{2} a^2 \mathbf{Y}^\top \mathbf{Y} + \frac{a^2 \gamma^2}{2u^2} \mathbf{Y}^\top \mathbf{Y} \mathbf{Z}^\top \mathbf{Z} - \frac{a^2 \gamma^4}{4u^2 \rho^2} \mathbf{Z}^\top \mathbf{Z} \mathbf{Z}^\top \mathbf{Z} \right] \quad (\text{S4})$$

856 Let us explore the consequence of this symmetry. The output  $\mathbf{Y}$  of the optimization is a function  
857 of  $\mathbf{X}$  and  $\rho$ , thus we can define a function  $f$  such that:  $\mathbf{Y} = f(\mathbf{X}, \rho)$ :

$$\mathbf{Y} = f(\mathbf{X}, \rho) = \arg \min_{\mathbf{Y}} \max_{\mathbf{Z}} \frac{1}{T^2} \text{Tr} \left[ -T\mathbf{X}^\top \mathbf{Y} + \frac{T}{2} \mathbf{Y}^\top \mathbf{Y} + \frac{\gamma^2}{2u^2} \mathbf{Y}^\top \mathbf{Y} \mathbf{Z}^\top \mathbf{Z} - \frac{\gamma^4}{4u^2 \rho^2} \mathbf{Z}^\top \mathbf{Z} \mathbf{Z}^\top \mathbf{Z} \right] \quad (\text{S5})$$

858 The symmetry implies:

$$\mathbf{Y} = f(\mathbf{X}, \rho) \Leftrightarrow a\mathbf{Y} = f(a\mathbf{X}, \rho/a) \quad (\text{S6})$$

859 Thus:

$$f(\mathbf{X}, \rho) = \frac{1}{a} f(a\mathbf{X}, \rho/a) \quad \text{and also} \quad f(a\mathbf{X}, \rho) = a f(\mathbf{X}, a\rho) \quad (\text{S7})$$

860 This means performing an optimization with an input  $a\mathbf{X}$ , is equivalent to doing the optimization  
861 with input  $\mathbf{X}$  and parameter  $a\rho$ , and finally multiplying the obtained  $\mathbf{Y}$  by  $a$ .

862 It is worth noting though, that for a circuit with fixed  $\mathbf{W}$  and  $\mathbf{M}$ , scaling an input  $\mathbf{x}$  by a factor  
863  $a$ , simply scales the output  $\mathbf{y}$  by the same factor  $a$ , since it is a linear transformation, at least for  
864 the circuit without the non-negative constraints.

## 865 1.2 Limiting case and relation to whitening

866 For the case when  $D = K$ , the optimum for  $\mathbf{Z}$  is  $\mathbf{Z} = \frac{\rho}{\gamma} \mathbf{Y}$  and thus the middle term of the objective  
867 function (S1) drops, with and without non-negativity constraints on  $\mathbf{Y}$  and  $\mathbf{Z}$ . The objective  
868 function becomes:

$$\mathcal{L} = \min_{\mathbf{Y}} \frac{1}{T^2} \left( \frac{T}{2} \|\mathbf{X} - \mathbf{Y}\|_F^2 + \frac{\rho^2}{4u^2} \left\| \mathbf{Y}^\top \mathbf{Y} \right\|_F^2 \right) \quad (\text{S8})$$



869 This objective function closely resembles the whitening objective function:

$$\mathcal{L} = \min_{\mathbf{Y}} \|\mathbf{X} - \mathbf{Y}\|_F^2 + \lambda \left\| \mathbf{Y}\mathbf{Y}^\top - \alpha^2 \mathbf{I}_D \right\|_F^2 \quad (\text{S9})$$

$$= \min_{\mathbf{Y}} \|\mathbf{X} - \mathbf{Y}\|_F^2 + \lambda \text{Tr} \left[ \mathbf{Y}\mathbf{Y}^\top \mathbf{Y}\mathbf{Y}^\top - 2\alpha^2 \mathbf{Y}\mathbf{Y}^\top + \alpha^4 \mathbf{I}_D \right] \quad (\text{S10})$$

$$= \min_{\mathbf{Y}} \|\mathbf{X} - \mathbf{Y}\|_F^2 + \lambda \text{Tr} \left[ \mathbf{Y}^\top \mathbf{Y}\mathbf{Y}^\top \mathbf{Y} - 2\alpha^2 \mathbf{Y}^\top \mathbf{Y} \right] \quad (\text{S11})$$

$$= \min_{\mathbf{Y}} \|\mathbf{X} - \mathbf{Y}\|_F^2 - 2\alpha^2 \lambda \|\mathbf{Y}\|_F^2 + \lambda \left\| \mathbf{Y}^\top \mathbf{Y} \right\|_F^2 \quad (\text{S12})$$

870 For a fixed  $\alpha$ , increasing  $\lambda$  will eventually lead to perfect whitening. The singular values of  $\mathbf{Y}$  will  
871 then all be equal to  $\alpha$ , and the left and right singular vectors will be the same as those of  $\mathbf{X}$ .

## 872 2 Online solution

873 We show that the online algorithm to optimize the objective function (S2) can be mapped onto the  
874 architecture and neural dynamics of the olfactory neural circuit (**Fig. 1A**) with Hebbian plasticity.  
875 To find the online solution, we first introduce the unitless variables  $\mathbf{W} \in \mathbb{R}^{D \times K}$  and  $\mathbf{M} \in \mathbb{R}^{K \times K}$ :

$$\mathbf{W} = \frac{1}{Tu^2} \mathbf{Y}\mathbf{Z}^\top, \quad \mathbf{M} = \frac{1}{Tu^2} \mathbf{Z}\mathbf{Z}^\top \quad (\text{S13})$$

876 and perform the Hubbard-Stratonovich transform of (S2):

$$\begin{aligned} \mathcal{L} = \min_{\mathbf{Y}} \max_{\mathbf{Z}} \max_{\mathbf{W}} \min_{\mathbf{M}} \frac{1}{T} \text{Tr} \left[ -\mathbf{X}^\top \mathbf{Y} + \frac{1}{2} \mathbf{Y}^\top \mathbf{Y} + \gamma^2 \mathbf{Y}^\top \mathbf{W}\mathbf{Z} - \frac{\gamma^4}{2\rho^2} \mathbf{Z}^\top \mathbf{M}\mathbf{Z} \right] \\ - \frac{u^2 \gamma^2}{2} \text{Tr} \left[ \mathbf{W}^\top \mathbf{W} \right] + \frac{u^2 \gamma^4}{4\rho^2} \text{Tr} \left[ \mathbf{M}^\top \mathbf{M} \right] \quad (\text{S14}) \end{aligned}$$

877 We then rewrite (S14) in vector notation, with each sample point written out separately, and invert  
878 the order of min max (Pehlevan et al., 2018):

$$\begin{aligned} \mathcal{L} = \max_{\mathbf{W}} \min_{\mathbf{M}} \min_{\{\mathbf{y}^{(t)}\}} \max_{\{\mathbf{z}^{(t)}\}} \frac{1}{T} \sum_{t=1}^T \left( -\mathbf{x}^{(t)\top} \mathbf{y}^{(t)} + \frac{1}{2} \mathbf{y}^{(t)\top} \mathbf{y}^{(t)} + \gamma^2 \mathbf{y}^{(t)\top} \mathbf{W}\mathbf{z}^{(t)} - \frac{\gamma^4}{2\rho^2} \mathbf{z}^{(t)\top} \mathbf{M}\mathbf{z}^{(t)} \right) \\ - \frac{u^2 \gamma^2}{2} \text{Tr} \left[ \mathbf{W}^\top \mathbf{W} \right] + \frac{u^2 \gamma^4}{4\rho^2} \text{Tr} \left[ \mathbf{M}^\top \mathbf{M} \right] \quad (\text{S15}) \end{aligned}$$

879 Next we perform the optimization for each variable separately:  $\mathbf{y}^{(t)}$ ,  $\mathbf{z}^{(t)}$ ,  $\mathbf{W}$ , and  $\mathbf{M}$ . We  
880 consider the following case, which corresponds to the “online setting” for this objective function  
881 and alternate the optimization in  $\{\mathbf{y}^{(t)}, \mathbf{z}^{(t)}\}$  and in  $\{\mathbf{W}, \mathbf{M}\}$ : as a new sample (i.e., stimulus, input)  
882  $\mathbf{x}^{(t)}$  arrives, we find the values of  $\mathbf{z}^{(t)}$  and  $\mathbf{y}^{(t)}$  with the current values  $\mathbf{W}^{(t)}$  and  $\mathbf{M}^{(t)}$  and update  
883  $\mathbf{W}^{(t)}$  and  $\mathbf{M}^{(t)}$  to  $\mathbf{W}^{(t+1)}$  and  $\mathbf{M}^{(t+1)}$  before the arrival of the next sample  $\mathbf{x}^{(t+1)}$ . Biologically,  
884 this can be seen as first a convergence of neural spiking rates or neural electrical potential encoded  
885 through the variables  $\mathbf{y}^{(t)}$  and  $\mathbf{z}^{(t)}$ , and second a synaptic weight update based on those steady

886 state activity values. At a given sample index  $t$ , the minimum in  $\mathbf{y}^{(t)}$  and the maximum in  $\mathbf{z}^{(t)}$  can  
 887 be found by taking a derivative of (S15) with respect to  $\mathbf{y}^{(t)}$  and  $\mathbf{z}^{(t)}$ , respectively:

$$\begin{aligned}\frac{\partial \mathcal{L}}{\partial \mathbf{y}^{(t)}} &= \frac{1}{T} \left( -\mathbf{x}^{(t)} + \mathbf{y}^{(t)} + \gamma^2 \mathbf{W}^{(t)} \mathbf{z}^{(t)} \right) \\ \frac{\partial \mathcal{L}}{\partial \mathbf{z}^{(t)}} &= \frac{1}{T} \left( \gamma^2 \mathbf{W}^{(t)\top} \mathbf{y}^{(t)} - \frac{\gamma^4}{\rho^2} \mathbf{M}^{(t)} \mathbf{z}^{(t)} \right)\end{aligned}\tag{S16}$$

888 The minimum in  $\mathbf{y}^{(t)}$  and the maximum in  $\mathbf{z}^{(t)}$  can be reached by a gradient descent and ascent,  
 889 respectively. We can thus write a system of differential equations whose steady state correspond to  
 890 the optimum:

$$\begin{cases} \tau_y \frac{d\mathbf{y}^{(t)}(\tau)}{d\tau} = -\mathbf{y}^{(t)}(\tau) - \gamma^2 \mathbf{W}^{(t)} \mathbf{z}^{(t)}(\tau) + \mathbf{x}^{(t)} \\ \tau_z \frac{d\mathbf{z}^{(t)}(\tau)}{d\tau} = -\mathbf{M}^{(t)} \mathbf{z}^{(t)}(\tau) + \rho^2 / \gamma^2 \mathbf{W}^{(t)\top} \mathbf{y}^{(t)}(\tau) \end{cases}\tag{S17}$$

891 Where  $\tau$  is the local time evolution variable. We rearranged the parameters so that the equation  
 892 form is the same as in equations (19), which does not change the final steady state of the equations.  
 893 Thus, we obtained equations to find the optima  $\bar{\mathbf{y}}^{(t)}$  and  $\bar{\mathbf{z}}^{(t)}$  of the objective function. As explained  
 894 in the main text, these question can directly be mapped onto the dynamics of the ORN-LN neural  
 895 circuit.

896 Next, we derived the updates for the variables  $\mathbf{W}$  and  $\mathbf{M}$ . By construction, the offline solution  
 897 for  $\mathbf{W}$  and  $\mathbf{M}$  is given by (S13). Online - we compute a new  $\mathbf{W}^{(t)}$  and  $\mathbf{M}^{(t)}$  after each sample  $\mathbf{x}^{(t)}$   
 898 is presented and  $\bar{\mathbf{y}}^{(t)}$  and  $\bar{\mathbf{z}}^{(t)}$  are found. The gradient descent (respectively ascent) steps on these  
 899 variables give the following updates (e.g., Pehlevan et al., 2018):

$$\begin{aligned}\mathbf{W}^{(t+1)} &= \mathbf{W}^{(t)} + \eta^{(t)} \left( \frac{\bar{\mathbf{z}}^{(t)} \bar{\mathbf{y}}^{(t)\top}}{u^2} - \mathbf{W}^{(t)} \right) \\ \mathbf{M}^{(t+1)} &= \mathbf{M}^{(t)} + \frac{\eta^{(t)}}{2\rho^2\nu} \left( \frac{\bar{\mathbf{z}}^{(t)} \bar{\mathbf{z}}^{(t)\top}}{u^2} - \mathbf{M}^{(t)} \right)\end{aligned}\tag{S18}$$

900 where  $\eta^{(t)}$  and  $\nu$  are parameters of the gradient descent/ascent, and where  $\bar{\mathbf{y}}^{(t)}$  and  $\bar{\mathbf{z}}^{(t)}$  are the  
 901 steady states solutions of equations (S17) for given  $\mathbf{W}^{(t)}$  and  $\mathbf{M}^{(t)}$ . This indeed corresponds to a  
 902 local Hebbian synaptic update rules. Choosing  $\eta^{(t)}$  and  $\nu$  appropriately will lead to equation (21)  
 903 from the main text.

## 904 2.1 Circuit equations for the NNC

905 In the case of the NNC, where we have objective function (18) instead of (S2), we get equation  
 906 (S15) with non-negativity constraints:

$$\mathcal{L} = \max_{\mathbf{W}} \min_{\mathbf{M}} \min_{\{\mathbf{y}^{(t)} \geq 0\}} \max_{\{\mathbf{z}^{(t)} \geq 0\}} \frac{1}{T} \sum_{t=1}^T \left( -\mathbf{x}^{(t)\top} \mathbf{y}^{(t)} + \frac{1}{2} \mathbf{y}^{(t)\top} \mathbf{y}^{(t)} + \gamma^2 \mathbf{y}^{(t)\top} \mathbf{W} \mathbf{z}^{(t)} - \frac{\gamma^4}{2\rho^2} \mathbf{z}^{(t)\top} \mathbf{M} \mathbf{z}^{(t)} \right) - \frac{u^2 \gamma^2}{2} \text{Tr} [\mathbf{W}^\top \mathbf{W}] + \frac{u^2 \gamma^4}{4\rho^2} \text{Tr} [\mathbf{M}^\top \mathbf{M}] \quad (\text{S19})$$

907 Here too, we perform the optimization for each variable separately:  $\mathbf{y}^{(t)}$ ,  $\mathbf{z}^{(t)}$ ,  $\mathbf{W}$ , and  $\mathbf{M}$ .  
 908 However, because of the non-negativity constraints, the optima for  $\mathbf{y}^{(t)}$  and  $\mathbf{z}^{(t)}$  are not to be found  
 909 at where the derivatives (S16) are zeros. We can, however, reach the optima by a projected gradient  
 910 descent:

$$\begin{cases} \mathbf{y}^{(t)}(\tau + 1) = \max \left[ \mathbf{0}, \mathbf{y}^{(t)}(\tau) + \epsilon(\tau) (-\mathbf{y}^{(t)}(\tau) - \gamma^2 \mathbf{W} \mathbf{z}^{(t)}(\tau) + \mathbf{x}^{(t)}) \right] \\ \mathbf{z}^{(t)}(\tau + 1) = \max \left[ \mathbf{0}, \mathbf{z}^{(t)}(\tau) + \epsilon(\tau) (-\mathbf{M} \mathbf{z}^{(t)}(\tau) + \rho^2 / \gamma^2 \mathbf{W}^\top \mathbf{y}^{(t)}(\tau)) \right] \end{cases} \quad (\text{S20})$$

911 where the max is performed component-wise. For the NNC, the updates on  $\mathbf{W}^{(t)}$  and  $\mathbf{M}^{(t)}$  (equa-  
 912 tions (S18)) remain the same as for the LC.

## 913 2.2 Steady state solution of the circuit dynamical equations for the LC and stability

914 We can directly find the steady state solution of the circuit dynamics equations (S17) of the LC by  
 915 setting the derivatives to 0. For  $\mathbf{M}$  invertible, the steady state is (after dropping the index ( $t$ ) for  
 916 simplicity of notation):

$$\begin{cases} \bar{\mathbf{y}} = (\mathbf{I}_D + \rho^2 \mathbf{W} \mathbf{M}^{-1} \mathbf{W}^\top)^{-1} \mathbf{x} \\ \bar{\mathbf{z}} = \rho^2 / \gamma^2 \mathbf{M}^{-1} \mathbf{W}^\top \bar{\mathbf{y}} \end{cases} \quad (\text{S21})$$

917 As mentioned above, the steady state for  $\mathbf{y}$  does not depend on  $\gamma$ , whereas  $\mathbf{z}$  does depend on  $\gamma$ .  
 918 Note that the transformation from  $\mathbf{x}$  to  $\bar{\mathbf{y}}$  is symmetric: indeed, writing  $\bar{\mathbf{y}} = \mathbf{F} \mathbf{x}$ , we have that  
 919  $\mathbf{F} = \mathbf{F}^\top$ . This means that the transformation is diagonalizable. It will be shown below that this  
 920 basis in which the transformation is diagonal corresponds to the PCA basis of  $\mathbf{X}$ .

921 Here we show that the fix point of equations (S17) is stable if  $\mathbf{W}$  is maximum rank and  $\mathbf{M}$   
 922 positive definite. We first rewrite the dynamical system:

$$\begin{bmatrix} \tau_y d\mathbf{y}(\tau)/d\tau \\ \tau_y d\mathbf{z}(\tau)/d\tau \end{bmatrix} = \begin{bmatrix} \mathbf{x} \\ \mathbf{0} \end{bmatrix} - \begin{bmatrix} \mathbf{I}_D & \gamma^2 \mathbf{W} \\ -\rho^2 / \gamma^2 \mathbf{W}^\top & \mathbf{M} \end{bmatrix} \begin{bmatrix} \mathbf{y}(\tau) \\ \mathbf{z}(\tau) \end{bmatrix} = \begin{bmatrix} \mathbf{x} \\ \mathbf{0} \end{bmatrix} - \mathbf{A} \begin{bmatrix} \mathbf{y}(\tau) \\ \mathbf{z}(\tau) \end{bmatrix} \quad (\text{S22})$$

923 This system has a unique stable fix point if and only if  $\mathbf{A}$  has only positive eigenvalues. To

924 investigate under which conditions this is the case, we write the eigenvalue equations for  $\mathbf{A}$ :

$$\begin{bmatrix} \mathbf{I}_D & \gamma^2 \mathbf{W} \\ -\rho^2/\gamma^2 \mathbf{W}^\top & \mathbf{M} \end{bmatrix} \begin{bmatrix} \mathbf{y} \\ \mathbf{z} \end{bmatrix} = \lambda \begin{bmatrix} \mathbf{y} \\ \mathbf{z} \end{bmatrix} \quad (\text{S23})$$

$$\begin{cases} \mathbf{y} & + \gamma^2 \mathbf{W} \mathbf{z} = \lambda \mathbf{y} \\ -\rho^2/\gamma^2 \mathbf{W}^\top \mathbf{y} & + \mathbf{M} \mathbf{z} = \lambda \mathbf{z} \end{cases} \quad (\text{S24})$$

$$\begin{cases} \gamma^2 \mathbf{W} \mathbf{z} & = (\lambda - 1) \mathbf{y} \\ \rho^2/\gamma^2 \mathbf{W}^\top \mathbf{y} & = (\mathbf{M} - \lambda) \mathbf{z} \end{cases} \quad (\text{S25})$$

925 We consider the case when  $\lambda \neq 1$ , as we are interested to see if  $\lambda$  could potentially be negative.

$$\mathbf{y} = (\lambda - 1)^{-1} \gamma^2 \mathbf{W} \mathbf{z} \quad (\text{S26})$$

$$\implies \rho^2 \mathbf{W}^\top \mathbf{W} \mathbf{z} = (\lambda - 1)(\mathbf{M} - \lambda) \mathbf{z} \quad (\text{S27})$$

926  $\mathbf{W}^\top \mathbf{W} \in \mathbb{R}^{K \times K}$  is a positive semi-definite matrix, it is positive definite if  $\mathbf{W}$  is maximum rank (i.e.,  
927 rank  $K$ ). Assuming that  $\mathbf{W}$  is full rank, the matrix  $\mathbf{W}^\top \mathbf{W}$  on the left-hand side of the equation  
928 has only positive eigenvalues. The above equation does not have any solution  $\mathbf{z} \neq \mathbf{0}$  for  $\lambda < 0$  if  $\mathbf{M}$   
929 is positive definite (which is true when constructed as the autocorrelator of  $\mathbf{z}$ ). Thus,  $\mathbf{W}$  full rank  
930 and  $\mathbf{M}$  positive definite are sufficient conditions for the dynamical system to always converges to a  
931 stable fix point.

### 932 3 Circuit dynamics equations contains two effective parameters

933 Here we show that, in its general form, the system of differential equation describing the olfactory  
934 circuit has just two effective parameters and can be reduced to equation (19) (or (20)) from the  
935 main text. Without lack of generality the system of differential equations yields:

$$\begin{cases} \tau_1 \frac{d\mathbf{y}(\tau)}{d\tau} & = -a\mathbf{y}(\tau) - b\mathbf{W}_1 \mathbf{z}(\tau) + a\mathbf{x} \\ \tau_2 \frac{d\mathbf{z}(\tau)}{d\tau} & = -c\mathbf{M} \mathbf{z}(\tau) + d\mathbf{W}_2^\top \mathbf{y}(\tau) \end{cases} \quad (\text{S28})$$

936 Where we imposed that  $\mathbf{x} = \mathbf{y}$  in the case of no LN activity (i.e.,  $\mathbf{z} = \mathbf{0}$ ), that  $a > 0$ ,  $b > 0$ ,  $c > 0$ ,  
937  $d > 0$ , and that all ORNs have similar response properties (i.e., same coefficient in front of each  
938  $x_i$  and  $y_i$ ). To extract the effective parameters, we compute the steady state solution of equations  
939 (S28) by setting the derivatives to zero. We find, for invertible  $\mathbf{M}$ :

$$\begin{cases} \bar{\mathbf{y}} = \left( \mathbf{I}_D + \frac{bd}{ac} \mathbf{W}_1 \mathbf{M}^{-1} \mathbf{W}_2^\top \right)^{-1} \mathbf{x} \\ \bar{\mathbf{z}} = \frac{d}{c} \mathbf{M}^{-1} \mathbf{W}_2^\top \bar{\mathbf{y}} \end{cases} \quad (\text{S29})$$

940 This shows that we only have two degrees of freedom:  $\frac{bd}{ac}$  and  $\frac{d}{c}$ . We define  $\rho^2 := \frac{bd}{ac}$  and  $\gamma^2 :=$   
 941  $\frac{c}{d}\rho^2 = \frac{b}{a}$ . This gives us:

$$\begin{cases} \bar{\mathbf{y}} = \left( \mathbf{I}_D + \rho^2 \mathbf{W}_1 \mathbf{M}^{-1} \mathbf{W}_2^\top \right)^{-1} \mathbf{x} \\ \bar{\mathbf{z}} = \rho^2 / \gamma^2 \mathbf{M}^{-1} \mathbf{W}_2^\top \mathbf{y} \end{cases} \quad (\text{S30})$$

942 Now replacing these definitions into the original equations (S28) we get:

$$\begin{cases} \tau_1/a \frac{d\mathbf{y}(\tau)}{d\tau} = -\mathbf{y}(\tau) - \gamma^2 \mathbf{W}_1 \mathbf{z}(\tau) + \mathbf{x} \\ \tau_2/c \frac{d\mathbf{z}(\tau)}{d\tau} = -\mathbf{M}\mathbf{z}(\tau) + \rho^2 / \gamma^2 \mathbf{W}_2^\top \mathbf{y}(\tau) \end{cases} \quad (\text{S31})$$

943 By setting  $\tau_y := \tau_1/a$ ,  $\tau_z := \tau_2/c$  we obtain equation (19) from the main text (when  $\mathbf{W}_1 = \mathbf{W}_2$ ):

$$\begin{cases} \tau_y \frac{d\mathbf{y}(\tau)}{d\tau} = -\mathbf{y}(\tau) - \gamma^2 \mathbf{W}_1 \mathbf{z}(\tau) + \mathbf{x} \\ \tau_z \frac{d\mathbf{z}(\tau)}{d\tau} = -\mathbf{M}\mathbf{z}(\tau) + \rho^2 / \gamma^2 \mathbf{W}_2^\top \mathbf{y}(\tau) \end{cases} \quad (\text{S32})$$

944 Thus, scaling  $\mathbf{x}$ ,  $\mathbf{W}_1$ ,  $\mathbf{W}_2$  and  $\mathbf{M}$  is equivalent to controlling just two effective parameter  $\gamma$  and  
 945  $\rho$ . Scaling  $\tau_y$  and  $\tau_z$  does not influence the steady state solutions.

946 Increasing  $\rho$  increases the weight of feedforward connection, making the LN activity and the feed-  
 947 back inhibition stronger. Increasing  $\gamma$  simultaneously increases the feedback connection strength  
 948 and decreases the feedforward connection strength. Changing  $\gamma$  influences the steady state solution  
 949 of  $\mathbf{z}$  but not  $\mathbf{y}$ . Thus, a manifold of circuits lead to the same steady state output  $\mathbf{y}$ . In addition,  
 950 the same differential equations can be implemented by different circuits. For example, multiplying  
 951 a differential equation by a parameter does not alter the final steady state, but gives yet another  
 952 implementation to the circuit as a scaling of the synaptic weights and of the time constant.

## 953 4 Circuit computation

954 To understand the computation performed by the olfactory circuit, we analyzed the optimization  
 955 done by the objective function (S2), which corresponds to the linear circuit (LC). We use the  
 956 singular value decomposition (SVD) for  $\mathbf{X}$ ,  $\mathbf{Y}$ , and  $\mathbf{Z}$ :  $\mathbf{X} = \mathbf{U}_X \tilde{\mathbf{S}}_X \mathbf{V}_X^\top$ ,  $\mathbf{Y} = \mathbf{U}_Y \tilde{\mathbf{S}}_Y \mathbf{V}_Y^\top$ ,  $\mathbf{Z} =$   
 957  $\mathbf{U}_Z \tilde{\mathbf{S}}_Z \mathbf{V}_Z^\top$ , with the following convention:  $\mathbf{U}_X, \mathbf{U}_Y \in \mathbb{R}^{D \times D}$ ,  $\mathbf{U}_Z \in \mathbb{R}^{K \times K}$ ,  $\mathbf{V}_X, \mathbf{V}_Y, \mathbf{V}_Z \in \mathbb{R}^{T \times T}$ ,  
 958  $\tilde{\mathbf{S}}_X, \tilde{\mathbf{S}}_Y \in \mathbb{R}^{D \times T}$ ,  $\tilde{\mathbf{S}}_Z \in \mathbb{R}^{K \times T}$ ,  $\tilde{\mathbf{S}}_X, \tilde{\mathbf{S}}_Y, \tilde{\mathbf{S}}_Z$  only have values on the diagonal. We call  $\tilde{\mathbf{S}} \in \mathbb{R}^{T \times T}$  the  
 959 diagonal square matrix corresponding to the rectangular matrix  $\tilde{\mathbf{S}}$ , with padded zeros. Only the  
 960 first  $D$  columns in  $\mathbf{V}_X$  and  $\mathbf{V}_Y$  and the first  $K$  in  $\mathbf{V}_Z$  contain relevant information about  $\mathbf{X}$ ,  $\mathbf{Y}$ ,  
 961 and  $\mathbf{Z}$ , respectively. The left singular vectors  $\mathbf{U}_X$ ,  $\mathbf{U}_Y$ , and  $\mathbf{U}_Z$  are also the principal directions of  
 962 the uncentered PCA of  $\mathbf{X}$ ,  $\mathbf{Y}$ , and  $\mathbf{Z}$ , respectively. Whereas the values on the diagonal of  $\tilde{\mathbf{S}}_X$ ,  $\tilde{\mathbf{S}}_Y$ ,  
 963 and  $\tilde{\mathbf{S}}_Z$  are the square root of the variances of the corresponding PCA directions.



981  $s_{Z,i} = \rho/\gamma s_{Y,i}$ . The similarity matching term becomes:

$$\left\| \mathbf{Y}^\top \mathbf{Y} - \frac{\gamma^2}{\rho^2} \mathbf{Z}^\top \mathbf{Z} \right\|_F^2 = \left\| \mathbf{V}_Y \mathbf{S}_Y^2 \mathbf{V}_Y^\top - \frac{\gamma^2}{\rho^2} \mathbf{V}_Z \mathbf{S}_Z^2 \mathbf{V}_Z^\top \right\|_F^2 \quad (\text{S38})$$

$$= \left\| \mathbf{V}_Y \left( \mathbf{S}_Y^2 - \frac{\gamma^2}{\rho^2} \mathbf{S}_Z^2 \right) \mathbf{V}_Y^\top \right\|_F^2 \quad (\text{S39})$$

$$= \text{Tr} \left[ \left( \mathbf{S}_Y^2 - \frac{\gamma^2}{\rho^2} \mathbf{S}_Z^2 \right)^2 \right] \quad (\text{S40})$$

$$= \sum_{i=K+1}^D s_{Y,i}^4 \quad (\text{S41})$$

982 And thus  $\mathbf{U}_Z$  does not appear in the optimization and is a free parameter. Also  $\|\mathbf{Y}^\top \mathbf{Y}\|_F^2 =$   
 983  $\sum_{i=1}^D s_{Y,i}^4$ . Thus, the objective function (S1) becomes:

$$\mathcal{L} = \min_{\mathbf{Y}} \frac{1}{T^2} \left( \text{Tr} \left[ -T \mathbf{X}^\top \mathbf{Y} + \frac{T}{2} \mathbf{Y}^\top \mathbf{Y} \right] - \frac{\rho^2}{4u^2} \sum_{i=K+1}^D s_{Y,i}^4 + \frac{\rho^2}{4u^2} \sum_{i=1}^D s_{Y,i}^4 \right) \quad (\text{S42})$$

$$= \min_{\mathbf{Y}} \frac{1}{T^2} \left( \text{Tr} \left[ -T \mathbf{X}^\top \mathbf{Y} \right] + \frac{T}{2} \sum_{i=1}^D s_{Y,i}^2 + \frac{\rho^2}{4u^2} \sum_{i=1}^K s_{Y,i}^4 \right) \quad (\text{S43})$$

984 Thus there is a fourth order penalty on the first  $K$  singular values of  $\mathbf{Y}$ .

985 We now replace the remaining  $\mathbf{X}$  and  $\mathbf{Y}$  by their SVD:

$$\mathcal{L} = \min_{\mathbf{Y}} \frac{1}{T^2} \left( \text{Tr} \left[ -T \mathbf{V}_X \tilde{\mathbf{S}}_X \mathbf{U}_X^\top \mathbf{U}_Y \tilde{\mathbf{S}}_Y \mathbf{V}_Y \right] + \frac{T}{2} \sum_{i=1}^D s_{Y,i}^2 + \frac{\rho^2}{4u^2} \sum_{i=1}^K s_{Y,i}^4 \right) \quad (\text{S44})$$

986 Based on von Neumann trace inequality, given a fixed  $\tilde{\mathbf{S}}_Y$ , the trace term is minimized when  
 987  $\mathbf{U}_Y = \mathbf{U}_X$  and  $\mathbf{V}_Y = \mathbf{V}_X$ . We are thus left with:

$$\mathcal{L} = \min_{\{s_{Y,i}\}} \frac{1}{T^2} \left( -T \sum_{i=1}^D s_{X,i} s_{Y,i} + \frac{T}{2} \sum_{i=1}^D s_{Y,i}^2 + \frac{\rho^2}{4u^2} \sum_{i=1}^K s_{Y,i}^4 \right) \quad (\text{S45})$$

988 Each  $s_{Y,i}$  can be optimized independently. We take the derivative of (S45) with respect to  $s_{Y,i}$  and  
 989 equate it to 0. For  $i > K$ , we have  $s_{Y,i} = s_{X,i}$ . For  $i \leq K$ :

$$-T s_{X,i} + T s_{Y,i} + \frac{\rho^2}{u^2} s_{Y,i}^3 = 0 \quad (\text{S46})$$

$$s_{X,i} = s_{Y,i} \left( 1 + \frac{\rho^2}{T u^2} s_{Y,i}^2 \right) \quad (\text{S47})$$

990 This end the derivation.



## 991 4.2 Approach 2

992 We first find the stationary point of the objective function (S2) in  $\mathbf{Y}$  by taking the partial derivative  
993 of  $\mathcal{L}$  with respect to  $\mathbf{Y}$ :

$$\mathbf{Y} = \mathbf{X} \left( \mathbf{I}_T + \frac{\gamma^2}{Tu^2} \mathbf{Z}^\top \mathbf{Z} \right)^{-1} \quad (\text{S48})$$

994 where  $\mathbf{I}_T$  is the identity matrix of dimension  $T$  and replace this solution for  $\mathbf{Y}$  into the objective  
995 function  $\mathcal{L}$ :

$$\mathcal{L} = \min_{\mathbf{Z}} \frac{1}{T^2} \text{Tr} \left[ \frac{T}{2} \mathbf{X}^\top \mathbf{X} \left( \mathbf{I}_T + \frac{\gamma^2}{Tu^2} \mathbf{Z}^\top \mathbf{Z} \right)^{-1} + \frac{\gamma^4}{4u^2 \rho^2} \mathbf{Z}^\top \mathbf{Z} \mathbf{Z}^\top \mathbf{Z} \right] \quad (\text{S49})$$

996 Next we replace  $\mathbf{X}$  and  $\mathbf{Z}$  by their SVD, use the property of the trace  $\text{Tr}(\mathbf{AB}) = \text{Tr}(\mathbf{BA})$  and the  
997 property of orthogonal matrices  $\mathbf{U}\mathbf{U}^\top = \mathbf{U}^\top \mathbf{U} = \mathbf{I}$ :

$$\mathcal{L} = \min_{\mathbf{Z}} \frac{1}{T^2} \text{Tr} \left[ \frac{T}{2} \mathbf{V}_X \mathbf{S}_X^2 \mathbf{V}_X^\top \left( \mathbf{I}_T + \frac{\gamma^2}{Tu^2} \mathbf{V}_Z \mathbf{S}_Z^2 \mathbf{V}_Z^\top \right)^{-1} + \frac{\gamma^4}{4u^2 \rho^2} \mathbf{S}_Z^4 \right] \quad (\text{S50})$$

$$= \min_{\mathbf{Z}} \frac{1}{T^2} \text{Tr} \left[ \frac{T}{2} \mathbf{V}_X \mathbf{S}_X^2 \mathbf{V}_X^\top \left( \frac{\mathbf{V}_Z (Tu^2 \mathbf{I}_T + \gamma^2 \mathbf{S}_Z^2) \mathbf{V}_Z^\top}{Tu^2} \right)^{-1} + \frac{\gamma^4}{4u^2 \rho^2} \mathbf{S}_Z^4 \right] \quad (\text{S51})$$

$$= \min_{\mathbf{Z}} \text{Tr} \left[ \frac{1}{2} \mathbf{V}_X \mathbf{S}_X^2 \mathbf{V}_X^\top \mathbf{V}_Z (Tu^2 \mathbf{I}_T + \gamma^2 \mathbf{S}_Z^2)^{-1} \mathbf{V}_Z^\top + \frac{\gamma^4}{4T^2 u^4 \rho^2} \mathbf{S}_Z^4 \right] \quad (\text{S52})$$

998 Since  $\mathbf{U}_Z$  does not appear in the minimization, it is a free parameter, i.e., it can be any orthogonal  
999 matrix. For fixed  $\mathbf{S}_Z$ , only the first term in the trace needs to be minimized. One can show that  
1000 the optimal  $\mathbf{V}_Z$  is  $\mathbf{V}_Z = \mathbf{V}_X$ : based on von Neumann trace inequality, we know that  $\text{Tr}[\mathbf{AB}] \geq$   
1001  $\sum_i^N a_i b_{N-i+1}$  where  $a_i$  and  $b_i$  are the ordered singular values of  $\mathbf{A}$  and  $\mathbf{B}$ , respectively. Thus,  
1002 choosing  $\mathbf{V}_Z = \mathbf{V}_X$  will give us the lower bound of that inequality. Indeed:

$$\begin{aligned} & \text{Tr} \left[ \mathbf{V}_X \mathbf{S}_X^2 \mathbf{V}_X^\top \mathbf{V}_Z (Tu^2 \mathbf{I}_T + \gamma^2 \mathbf{S}_Z^2)^{-1} \mathbf{V}_Z^\top \right] \\ &= \text{Tr} \left[ \mathbf{S}_X^2 (Tu^2 \mathbf{I}_T + \gamma^2 \mathbf{S}_Z^2)^{-1} \right] \\ &= \sum_i^T s_{X,i}^2 \frac{1}{Tu^2 + \gamma^2 s_{Z,i}^2} \end{aligned} \quad (\text{S53})$$

1003 Where  $s_{X,i}$  and  $s_{Z,i}$  are the values on the diagonal of  $\mathbf{S}_X$  and  $\mathbf{S}_Z$ , respectively. Thus, the highest  
1004 singular values of  $\mathbf{V}_X \mathbf{S}_X^2 \mathbf{V}_X^\top$  match the lowest singular values of  $\mathbf{V}_Z (Tu^2 \mathbf{I}_T + \gamma^2 \mathbf{S}_Z^2)^{-1} \mathbf{V}_Z^\top$ , giving  
1005 us the lower bound of the von Neumann inequality. Equation (S52) can now be simplified to:

$$\mathcal{L} = \min_{\{s_{Z,i}\}} \sum_i^T \left( \frac{1}{2} s_{X,i}^2 \frac{1}{Tu^2 + \gamma^2 s_{Z,i}^2} + \frac{\gamma^4}{4T^2 u^4 \rho^2} s_{Z,i}^4 \right) \quad (\text{S54})$$

1006 Each  $s_{Z,i}$  can be minimized independently. By construction of SVD, we already have that  $s_{Z,i} = 0$   
1007 for  $i > K$ . We thus consider  $1 \leq i \leq K$ . To simplify notation, we drop the index  $i$ . We take the

1008 derivative of (S54) with respect to  $s_{Z,i}$  and equate it to 0:

$$\frac{\partial \mathcal{L}}{\partial s_Z} = 0 \quad (\text{S55})$$

$$-\frac{\gamma^2}{(Tu^2 + \gamma^2 s_Z^2)^2} s_X^2 s_Z + \frac{\gamma^4}{T^2 u^4 \rho^2} s_Z^3 = 0 \quad (\text{S56})$$

$$s_X^2 = \frac{\gamma^2 (Tu^2 + \gamma^2 s_Z^2)^2}{\rho^2 T^2 u^4} s_Z^2 \quad (\text{S57})$$

1009 Which leads to, considering that singular values are positive:

$$s_X = \frac{\gamma}{\rho} s_Z \left( 1 + \frac{\gamma^2}{Tu^2} s_Z^2 \right) \quad (\text{S58})$$

1010 We can now use the obtained solution for  $\mathbf{Z}$  to find the solution for  $\mathbf{Y}$ . We replace  $\mathbf{X}$  and  $\mathbf{Z}$  by  
1011 their SVD in relation (S48) and use that  $\mathbf{V}_X = \mathbf{V}_Z$ :

$$\mathbf{Y} = \mathbf{U}_Y \tilde{\mathbf{S}}_Y \mathbf{V}_Y^\top = \mathbf{X} \left( \mathbf{I}_T + \frac{\gamma^2}{Tu^2} \mathbf{Z}^\top \mathbf{Z} \right)^{-1} \quad (\text{S59})$$

$$= \mathbf{U}_X \tilde{\mathbf{S}}_X \mathbf{V}_X^\top \left( \mathbf{I}_T + \frac{\gamma^2}{Tu^2} \mathbf{V}_X \mathbf{S}_Z^2 \mathbf{V}_X^\top \right)^{-1} \quad (\text{S60})$$

$$= \mathbf{U}_X \tilde{\mathbf{S}}_X \mathbf{V}_X^\top \mathbf{V}_X \left( \mathbf{I}_T + \frac{\gamma^2}{Tu^2} \mathbf{S}_Z^2 \right)^{-1} \mathbf{V}_X^\top \quad (\text{S61})$$

$$\mathbf{U}_Y \tilde{\mathbf{S}}_Y \mathbf{V}_Y^\top = \mathbf{U}_X \tilde{\mathbf{S}}_X \left( \mathbf{I}_T + \frac{\gamma^2}{Tu^2} \mathbf{S}_Z^2 \right)^{-1} \mathbf{V}_X^\top \quad (\text{S62})$$

1012 Equating the SVD terms on the left and right sides we obtain  $\mathbf{U}_Y = \mathbf{U}_X$  and  $\mathbf{V}_X = \mathbf{V}_Y$  and

$$s_{Y,i} = s_{X,i} \left( 1 + \frac{\gamma^2}{Tu^2} s_{Z,i}^2 \right)^{-1} \quad (\text{S63})$$

1013 Thus, for  $i > K$ , we have  $s_{Y,i} = s_{X,i}$  (since  $s_{Z,i} = 0$ ), whereas for  $i \leq K$ :  $s_{Y,i} = \frac{\gamma}{\rho} s_{Z,i}$  (using  
1014 relation (S58) to replace  $s_X$ ). The relation analogous to (S58) is:

$$s_X = s_Y \left( 1 + \frac{\rho^2}{Tu^2} s_Y^2 \right) \quad (\text{S64})$$

1015 This ends the derivation.

### 1016 4.3 Effect of $\rho$ and relation to SNMF

1017 Having the expression for the output  $\mathbf{Y}$ , we can now describe the effect of  $\rho$  on the computation.  
1018 For  $\rho \rightarrow 0$ ,  $\mathbf{Z} \rightarrow 0$ , leading to  $\mathbf{X} = \mathbf{Y}$ , which means that the output is equal to the input and no  
1019 inhibition is taking place. On the other hand, for  $\rho \rightarrow \infty$ , the lowest  $D - K$  singular values of  $\mathbf{Y}$   
1020 remain the same, whereas top  $K$  drop to 0, i.e., the top  $K$  singular values are totally suppressed.

1021 To better understand the behavior of the circuit for small  $\rho$  we do a first order expansion in  $\rho$   
 1022 of  $\mathbf{Y}$  around  $\mathbf{X}$ , i.e.,  $\mathbf{Y} = \mathbf{X} + \rho\boldsymbol{\Xi}$ . Replacing this expression for  $\mathbf{Y}$  in the objective function (S2),  
 1023 and keeping only the leading terms in  $\rho$ , the objective function becomes:

$$\mathcal{L} = \min_{\mathbf{Z}} \left\| \gamma^2 \mathbf{Z}^\top \mathbf{Z} - \rho^2 \mathbf{X}^\top \mathbf{X} \right\|_F^2 \quad (\text{S65})$$

1024 Which corresponds to the basic similarity matching objective function (Pehlevan et al., 2018).

1025 For the non-negative objective function, for small  $\rho$  we get  $\mathbf{Y} = [\mathbf{X}]_+$  and the objective function  
 1026 simplifies to

$$\mathcal{L} = \min_{\mathbf{Z} \geq 0} \left\| \gamma^2 \mathbf{Z}^\top \mathbf{Z} - \rho^2 [\mathbf{X}]_+^\top [\mathbf{X}]_+ \right\|_F^2 \quad (\text{S66})$$

1027 Which corresponds to the symmetric non-negative matrix factorization (SNMF) objective function  
 1028 and can also be implemented online by a neural circuit (Pehlevan & Chklovskii, 2015).

## 1029 5 Relationship between $\mathbf{W}$ and $\mathbf{M}$

1030 Here we prove the relationship  $\rho^2/\gamma^2 \mathbf{W}\mathbf{W}^\top = \mathbf{M}^2$  for the LC.

1031 One way to obtain this relationship is to start from the circuit dynamics (equations (S17)). The  
 1032 steady state for  $\bar{\mathbf{z}}^{(t)}$  is:

$$\rho^2/\gamma^2 \mathbf{W}\bar{\mathbf{y}}^{(t)} = \mathbf{M}\bar{\mathbf{z}}^{(t)} \quad (\text{S67})$$

1033 Multiplying by  $\bar{\mathbf{z}}^{(t)\top}$  on both sides, taking the average over all samples  $t$ , and using the definition  
 1034 of  $\mathbf{W}$  and  $\mathbf{M}$  (equation (S13)):

$$\rho^2/\gamma^2 \mathbf{W}\mathbf{E} \left[ \bar{\mathbf{y}}^{(t)} \bar{\mathbf{z}}^{(t)\top} \right] / u^2 = \mathbf{M}\mathbf{E} \left[ \bar{\mathbf{z}}^{(t)} \bar{\mathbf{z}}^{(t)\top} \right] / u^2 \quad (\text{S68})$$

$$\rho^2/\gamma^2 \mathbf{W}\mathbf{W}^\top = \mathbf{M}^2 \quad (\text{S69})$$

1035 An alternative approach to find the above relationship is to use the definition of  $\mathbf{W}$  and  $\mathbf{M}$   
 1036 (equation (S13)) and the SVD decomposition of  $\mathbf{X}$ ,  $\mathbf{Y}$ , and  $\mathbf{Z}$ . We write out  $\mathbf{W}$  and  $\mathbf{M}$ :

$$\mathbf{W} = \frac{1}{Tu^2} \mathbf{Y}\mathbf{Z}^\top = \frac{1}{Tu^2} \mathbf{U}_Y \tilde{\mathbf{S}}_Y \mathbf{V}_Y^\top \mathbf{V}_Z \tilde{\mathbf{S}}_Z^\top \mathbf{U}_Z^\top = \frac{1}{Tu^2} \mathbf{U}_X \tilde{\mathbf{S}}_Y \tilde{\mathbf{S}}_Z^\top \mathbf{U}_Z^\top = \frac{\gamma}{Tu^2 \rho} \mathbf{U}_{X|K} \hat{\mathbf{S}}_Z^2 \mathbf{U}_Z^\top \quad (\text{S70})$$

$$\mathbf{M} = \frac{1}{Tu^2} \mathbf{Z}\mathbf{Z}^\top = \frac{1}{Tu^2} \mathbf{U}_Z \tilde{\mathbf{S}}_Z \mathbf{V}_Z^\top \mathbf{V}_Z \tilde{\mathbf{S}}_Z^\top \mathbf{U}_Z^\top = \frac{1}{Tu^2} \mathbf{U}_Z \hat{\mathbf{S}}_Z^2 \mathbf{U}_Z^\top \quad (\text{S71})$$

1037 Where we used that  $\mathbf{V}_X = \mathbf{V}_Y = \mathbf{V}_Z$  and  $\mathbf{U}_X = \mathbf{U}_Y$  are orthogonal matrices and that  $s_{Y,i} = \frac{\gamma}{\rho} s_{Z,i}$   
 1038 for  $i \leq K$  and  $s_{Z,i} = 0$  for  $i > K$ . We call  $\hat{\mathbf{S}}_Z \in \mathbb{R}^{K \times K}$  the small square submatrix of the rectangular

1039 matrix  $\mathbf{S}_Z \in \mathbb{R}^{K \times N}$ .  $\mathbf{U}_{X|K} \in \mathbb{R}^{D \times K}$  is the submatrix with the first  $K$  columns of  $\mathbf{U}_X$ . Thus:

$$\mathbf{W}^\top \mathbf{W} = \frac{\gamma^2}{T^2 u^4 \rho^2} \mathbf{U}_Z \hat{\mathbf{S}}_Z^2 \mathbf{U}_{X|K}^\top \mathbf{U}_{X|K} \hat{\mathbf{S}}_Z^2 \mathbf{U}_Z^\top \quad (\text{S72})$$

$$= \frac{\gamma^2}{T^2 u^4 \rho^2} \mathbf{U}_Z \hat{\mathbf{S}}_Z^4 \mathbf{U}_Z^\top = \frac{\gamma^2}{\rho^2} \mathbf{M}^2 \quad (\text{S73})$$

1040 Taking the square root on both sides gives the relationship (2) in the results section.

## 1041 6 Relationship between the statistics of ORN activity and ORN-LN connectivity

1042 Based on the expressions for  $\mathbf{W}$  and  $\mathbf{M}$  (equations (S70) and (S71)) we can write  $\mathbf{W}$  as:

$$\mathbf{W} = \frac{\gamma}{T u^2 \rho} \mathbf{U}_{X|K} \hat{\mathbf{S}}_Z^2 \mathbf{U}_Z^\top = \frac{\gamma}{T u^2 \rho} \mathbf{U}_{X|K} \mathbf{U}_Z^\top \mathbf{U}_Z \hat{\mathbf{S}}_Z^2 \mathbf{U}_Z^\top = \frac{\gamma}{\rho} \mathbf{U}_{X|K} \mathbf{U}_Z^\top \mathbf{M} \quad (\text{S74})$$

1043 Where we used that  $\mathbf{U}_Z^\top \mathbf{U}_Z = \mathbf{I}_K$ . Where  $\mathbf{U}_{X|K} \in \mathbb{R}^{D \times K}$  is the submatrix with the first  $K$  columns  
1044 of  $\mathbf{U}_X$ . As stated above,  $\mathbf{U}_Z$  is a free parameter and could be any orthogonal matrix.

1045 In the case of a single LN,  $\mathbf{W}$  is a column vector and corresponds to the first left eigenvector  
1046 of  $\mathbf{X}$ . For multiple LNs, the column vectors of  $\mathbf{W}$  span the same subspace as the top  $K$  loading  
1047 vectors of  $\mathbf{X}$ ,  $\mathbf{U}_{X|K}$ . However, because of the multiplication on the right by  $\mathbf{U}_Z^\top \mathbf{M}$ , the connections  
1048 vectors do not necessarily correspond to specific PCA directions and are not orthogonal, but only  
1049 span the top  $K$ -dimensional PCA subspace. Thus, this relation above gives us the relationship  
1050 between the left eigenvectors of  $\mathbf{X}$ ,  $\mathbf{W}$ , and  $\mathbf{M}$ .

## 1051 7 Decrease of the spread of the spectrum of singular values

1052 Here we show that the coefficient of variation (CV, i.e., the spread) of singular values is smaller at  
1053 the ORN output (axons) than at the input (somas) in the LC model with the number of ORNs  
1054 equal to the number of LN. In that case, we have  $s_X = s_Y \left(1 + \frac{\rho^2}{T} s_Y^2\right)$ . As we have shown, for  
1055 small  $s_X$ , we have  $s_Y \approx s_X$  and for large  $s_X$ , we have  $s_Y \approx (T/\rho^2 s_X)^{1/3}$ . We call  $X$  a positive  
1056 random variable. We will show that for a  $0 < \alpha < 1$ ,  $\text{CV}(X) \geq \text{CV}(X^\alpha)$ , which mimics the case

1057 we have.

$$\text{CV}(X) \geq \text{CV}(X^\alpha) \quad (\text{S75})$$

$$\Leftrightarrow \frac{\sigma_X}{\mathbf{E}[X]} \geq \frac{\sigma_{X^\alpha}}{\mathbf{E}[X^\alpha]} \quad (\text{S76})$$

$$\Leftrightarrow \frac{\sigma_X^2}{\mathbf{E}[X]^2} \geq \frac{\sigma_{X^\alpha}^2}{\mathbf{E}[X^\alpha]^2} \quad (\text{S77})$$

$$\Leftrightarrow \frac{\mathbf{E}[X^2] - \mathbf{E}[X]^2}{\mathbf{E}[X]^2} \geq \frac{\mathbf{E}[X^{2\alpha}] - \mathbf{E}[X^\alpha]^2}{\mathbf{E}[X^\alpha]^2} \quad (\text{S78})$$

$$\Leftrightarrow \frac{\mathbf{E}[X^2]}{\mathbf{E}[X]^2} \geq \frac{\mathbf{E}[X^{2\alpha}]}{\mathbf{E}[X^\alpha]^2} \quad (\text{S79})$$

1058 The last inequality can be proven by using Hölder's inequality twice. First:

$$\left(\mathbf{E}[X^2]\right)^{\frac{1-\alpha}{2-\alpha}} \left(\mathbf{E}[X^\alpha]\right)^{\frac{1}{2-\alpha}} \geq \mathbf{E}[X] \quad (\text{S80})$$

1059 which leads to:

$$\frac{\mathbf{E}[X^2]}{\mathbf{E}[X]^2} \geq \frac{\left(\mathbf{E}[X^2]\right)^{\frac{\alpha}{2-\alpha}}}{\left(\mathbf{E}[X^\alpha]\right)^{\frac{2}{2-\alpha}}} \quad (\text{S81})$$

1060 and second:

$$\left(\mathbf{E}[X^2]\right)^{\frac{\alpha}{2-\alpha}} \left(\mathbf{E}[X^\alpha]\right)^{\frac{2-2\alpha}{2-\alpha}} \geq \mathbf{E}[X^{2\alpha}] \quad (\text{S82})$$

1061 which leads to:

$$\frac{\left(\mathbf{E}[X^2]\right)^{\frac{\alpha}{2-\alpha}}}{\left(\mathbf{E}[X^\alpha]\right)^{\frac{2}{2-\alpha}}} \geq \frac{\mathbf{E}[X^{2\alpha}]}{\mathbf{E}[X^\alpha]^2} \quad (\text{S83})$$

1062 Combining inequalities (S81) and (S83) proves inequality (S79) and ends the proof.
